# Supplementary material for: Conserved genes in a path from commensalism to pathogenicity: comparative phylogenetic profiles of Staphylococcus epidermidis RP62A and ATCC12228
Source: PubMed Central journal article supplement (PMC1482698; doi:10.1186/1471-2164-7-112), 2006-05-10
Supplement: 1471-2164-7-112-S2.pdf [file 1471-2164-7-112-S2.pdf]

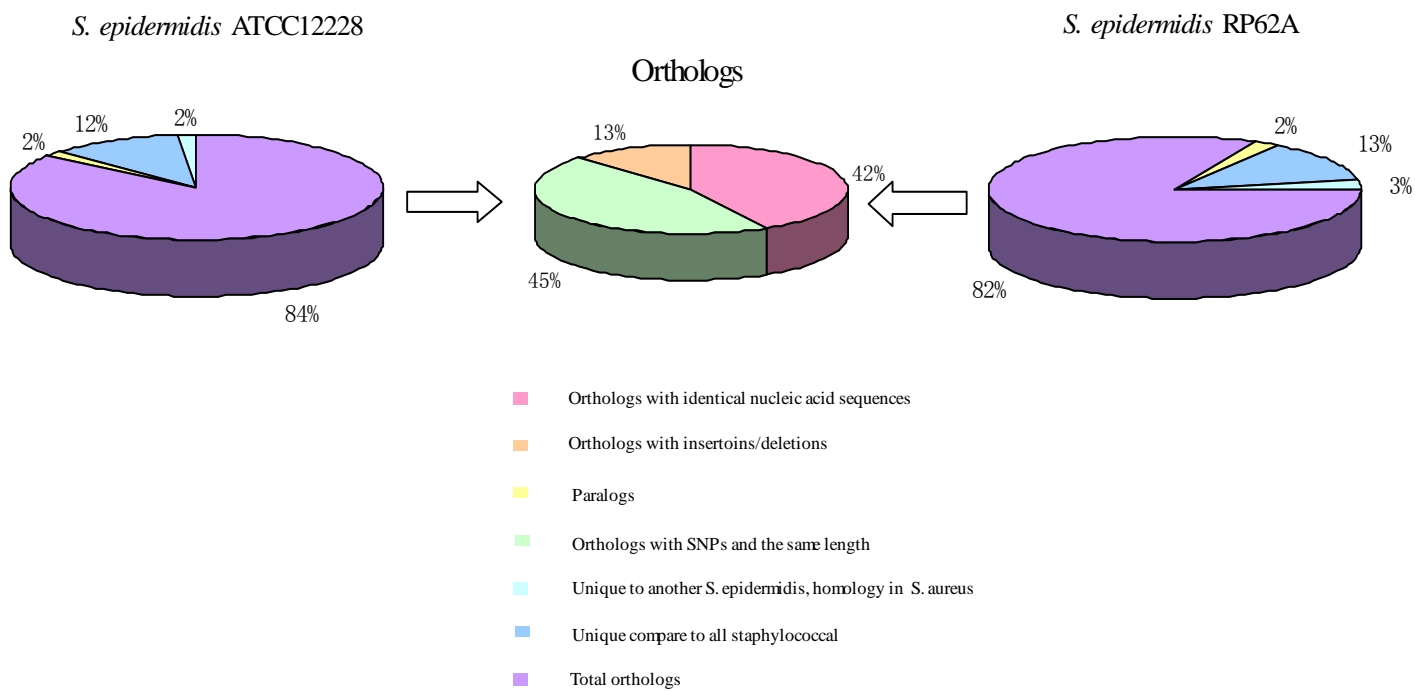

**Additional file 2.** Distribution of orthologs of two *Staphylococcus epidermidis* strains.
