# Supplementary material for: Conserved genes in a path from commensalism to pathogenicity: comparative phylogenetic profiles of Staphylococcus epidermidis RP62A and ATCC12228
Source: PubMed Central journal article supplement (PMC1482698; doi:10.1186/1471-2164-7-112), 2006-05-10
Supplement: 1471-2164-7-112-S3.pdf [file 1471-2164-7-112-S3.pdf]

**Additional file 3.** Ratios of nonsynonymous vs synonymous of orthologs with SNPs pairs of Virulence factors.

| Virulence factor                  | <i>S. epidermidis</i><br>RP62A | name  | function                                             | Compare to <i>S. epidermidis</i><br>ATCC12228 | ATCC12228 | n    | s    | dn     | ds     | dn/ds  | p value |
|-----------------------------------|--------------------------------|-------|------------------------------------------------------|-----------------------------------------------|-----------|------|------|--------|--------|--------|---------|
| Esterase                          | SERP1941                       | -     | esterase, putative                                   | identical                                     | SE1929    |      |      |        |        |        |         |
|                                   | SERP2109                       | -     | esterase, putative                                   | SNP                                           | SE2095    | 1    | 4    | 0.0014 | 0.0144 | 0.0886 | 0.9618  |
| Serine protease                   | SERP1292                       | -     | serine protease HtrA, putative                       | SNP                                           | SE1405    | 2    | 1    | 0.0023 | 0.0028 | 0.4510 | 0.5616  |
|                                   | SERP2401                       | -     | serine protease                                      | specific                                      |           |      |      |        |        |        |         |
| Serine V8 protease                | SERP1397                       | sspA  | glutamyl endopeptidase precursor SspA                | SNP                                           | SE1543    | 1    | 0    | 0.0016 | 0.0000 | 1.0000 | 0.1587  |
| Cysteine protease                 | SERP2390                       | sspB  | cysteine protease precursor SspB                     | identical                                     | SE0184    |      |      |        |        |        |         |
|                                   | SERP2391                       | sspC  | SspC protein                                         | indel                                         | SE0183    |      |      |        |        |        |         |
| Lipase                            | SERP2336                       | -     | lipase, putative                                     | SNP                                           | SE0245    | 6    | 20   | 0.0038 | 0.0336 | 0.1016 | 0.9999  |
|                                   | SERP0018                       | -     | lipase, putative                                     | SNP                                           | SE2403    | 1    | 0    | 0.0007 | 0.0000 | 1.0000 | 0.1587  |
|                                   | SERP2297                       | geh-1 | lipase                                               | SNP                                           | SE0281    | 15   | 21   | 0.0102 | 0.0369 | 0.2166 | 0.9992  |
|                                   | SERP2388                       | geh-2 | lipase                                               | SNP                                           | SE0185    | 16.5 | 16.5 | 0.0120 | 0.0310 | 0.2791 | 0.9900  |
| Lipase/esterase                   | SERP0309                       | -     | lipase/esterase, putative                            | identical                                     | SE0424    |      |      |        |        |        |         |
|                                   | SERP2252                       | sepA  | extracellular elastase precursor                     | SNP                                           | SE2219    | 1    | 1    | 0.0009 | 0.0023 | 0.2813 | 0.7146  |
| Beta hemolysin                    | SERP2544                       | hlb   | beta-hemolysin                                       | identical                                     | SE0008    |      |      |        |        |        |         |
| Delta hemolysin                   | SERP1489                       | hld   | delta-hemolysin                                      | identical                                     | SE1634    |      |      |        |        |        |         |
| Hemolysin III                     | SERP1769                       | -     | hemolysin III, putative                              | identical                                     | SE1760    |      |      |        |        |        |         |
| Hemolysin                         | SERP2258                       | -     | hemolysin, putative                                  | indel                                         | SE2226    |      |      |        |        |        |         |
| Thermonuclease                    | SERP0891                       | -     | thermonuclease precursor family protein              | indel                                         | SE1004    |      |      |        |        |        |         |
| nuclease                          | SERP1570                       | -     | Staphylococcal nuclease family protein               | specific                                      |           |      |      |        |        |        |         |
| Zinc metalloprotease              | SERP0829                       | -     | membrane-associated zinc metalloprotease, putative   | identical                                     | SE0938    |      |      |        |        |        |         |
| Clp protease, procolytic subunit  | SERP0436                       | clpP  | ATP-dependent Clp protease, proteolytic subunit ClpP | identical                                     | SE0551    |      |      |        |        |        |         |
| Clp protease, ATP binding subunit | SERP0564                       | clpB  | ATP-dependent Clp protease, ATP-binding subunit ClpB | SNP                                           | SE0674    | 2    | 0    | 0.0011 | 0.0000 | 1.0000 | 0.0846  |
| Clp protease, ATP binding subunit | SERP1238                       | clpX  | ATP-dependent Clp protease, ATP-binding subunit ClpX | identical                                     | SE1349    |      |      |        |        |        |         |
| Clp protease, ATP binding subunit | SERP0165                       | clpC  | ATP-dependent Clp protease, ATP-binding subunit ClpC | identical                                     | SE0287    |      |      |        |        |        |         |

|                           |          |     |                               |           |        |   |   |        |        |        |        |
|---------------------------|----------|-----|-------------------------------|-----------|--------|---|---|--------|--------|--------|--------|
| Phenol-soluble<br>modulin | SERP0736 | -   | phenol soluble modulin beta 1 | indel     | SE0846 |   |   |        |        |        |        |
|                           | SERP0737 | -   | phenol soluble modulin beta 1 | SNP       | SE0847 | 2 | 0 | 0.0216 | 0.0000 | 1.0000 | 0.0777 |
|                           | SERP0738 | -   | phenol soluble modulin beta 1 | paralog   |        |   |   |        |        |        |        |
|                           | SERP0739 | -   | phenol soluble modulin beta 1 | SNP       | SE0849 | 0 | 2 | 0.0000 | 0.0553 | 0.0000 | 0.9161 |
|                           | SERP2397 | -   | phenol soluble modulin beta 1 | identical | SE0177 |   |   |        |        |        |        |
|                           | SERP2400 | -   | phenol soluble modulin beta 1 | identical | SE0174 |   |   |        |        |        |        |
|                           | SERP0083 | -   | phenol soluble modulin alpha  | specific  |        |   |   |        |        |        |        |
|                           | SERP1489 | hld | delta-hemolysin               | identical | SE1634 |   |   |        |        |        |        |

---
