# Supplementary material for: Conserved genes in a path from commensalism to pathogenicity: comparative phylogenetic profiles of Staphylococcus epidermidis RP62A and ATCC12228
Source: PubMed Central journal article supplement (PMC1482698; doi:10.1186/1471-2164-7-112), 2006-05-10
Supplement: 1471-2164-7-112-S4.pdf [file 1471-2164-7-112-S4.pdf]

**Additional file 4.** Ratios of nonsynonymous vs synonymous of orthologs with SNPs pairs of Surface proteins.

| <i>S. epidermidis</i><br>RP62A | name | function                                         | Compare to<br>ATCC12228 | <i>S. epidermidis</i><br>ATCC12228 | n  | s  | dn     | ds     | dn/ds  | p value |
|--------------------------------|------|--------------------------------------------------|-------------------------|------------------------------------|----|----|--------|--------|--------|---------|
| SERP0026                       | -    | sdrF protein, truncation                         | specific                |                                    |    |    |        |        |        |         |
| SERP0207                       | -    | sdrG protein                                     | indel                   | SE0331                             |    |    |        |        |        |         |
| SERP1487                       | sdrH | sdrH protein                                     | indel                   | SE1632                             |    |    |        |        |        |         |
| SERP1316                       | -    | cell wall surface anchor family protein          | SNP                     | SE1429                             | 14 | 4  | 0.0018 | 0.0013 | 0.5806 | 0.2610  |
| SERP2162                       | -    | cell wall surface anchor family protein          | SNP                     | SE2152                             | 2  | 2  | 0.0048 | 0.0117 | 0.2909 | 0.7791  |
| SERP2264                       | -    | cell wall surface anchor family protein          | SNP                     | SE2232                             | 7  | 7  | 0.0048 | 0.0123 | 0.2807 | 0.9274  |
| SERP2392                       | bhp  | cell wall associated biofilm protein             | paralog                 |                                    |    |    |        |        |        |         |
| SERP0719                       | -    | cell wall surface anchor family protein          | indel                   | SE0828                             |    |    |        |        |        |         |
| SERP2398                       | aap  | accumulation associated protein                  | indel                   | SE0175                             |    |    |        |        |        |         |
| SERP1482                       | -    | cell wall surface anchor family protein          | specific                |                                    |    |    |        |        |        |         |
| SERP1483                       | -    | cell wall surface anchor family protein          | SNP                     | SE1628                             | 6  | 4  | 0.0078 | 0.0135 | 0.3662 | 0.7759  |
| SERP1654                       | -    | cell wall surface anchor family protein          | specific                |                                    |    |    |        |        |        |         |
|                                |      | hypothetical protein                             | specific                | SE1500                             |    |    |        |        |        |         |
|                                |      | hypothetical protein                             | specific                | SE1501                             |    |    |        |        |        |         |
| SERP1011                       | ebh  | cell wall associated fibronectin-binding protein | indel                   | SE1128                             |    |    |        |        |        |         |
| SERP1048                       | -    | elastin binding protein, putative                | indel                   | SE1169                             |    |    |        |        |        |         |
| SERP0636                       | atLE | bifunctional autolysin                           | SNP                     | SE0750                             | 1  | 1  | 0.0004 | 0.0009 | 0.3077 | 0.6942  |
| SERP0775                       | fbe  | fibronectin/fibrinogen binding protein           | SNP                     | SE0884                             | 4  | 32 | 0.0033 | 0.0709 | 0.0445 | 1.0000  |
