# Supplementary material for: Conserved genes in a path from commensalism to pathogenicity: comparative phylogenetic profiles of Staphylococcus epidermidis RP62A and ATCC12228
Source: PubMed Central journal article supplement (PMC1482698; doi:10.1186/1471-2164-7-112), 2006-05-10
Supplement: 1471-2164-7-112-S5.pdf [file 1471-2164-7-112-S5.pdf]

**Additional file 5.** Ratios of nonsynonymous vs synonymous of orthologs with all SNPs pairs.

| orthologs with<br>SNPs and same<br>length |          | R        | <i>S. epidermidis</i><br>RP62A |          | <i>S. epidermidis</i><br>ATCC12228 |          | AVERAGE  |          | <i>n</i> | <i>s</i> | <i>p<sub>n</sub></i> | <i>p<sub>s</sub></i> | <i>d<sub>n</sub></i> | <i>d<sub>s</sub></i> | <i>d<sub>n</sub>/d<sub>s</sub></i> | <i>i<sub>n</sub>/(d<sub>s</sub>+d<sub>n</sub>)</i> | Z score* | p value <sup>‡</sup> |
|-------------------------------------------|----------|----------|--------------------------------|----------|------------------------------------|----------|----------|----------|----------|----------|----------------------|----------------------|----------------------|----------------------|------------------------------------|----------------------------------------------------|----------|----------------------|
|                                           |          |          | N                              | S        | N                                  | S        | N        | S        |          |          |                      |                      |                      |                      |                                    |                                                    |          |                      |
|                                           |          |          | SE1029                         | SERP0918 | 2.330294                           | 2188.224 | 838.776  | 2187.701 |          |          |                      |                      |                      |                      |                                    |                                                    |          |                      |
| SE0231                                    | SERP2349 | 2.330294 | 310.396                        | 115.604  | 311.246                            | 114.754  | 311.909  | 114.091  | 4        | 0        | 0.0129               | 0.0000               | 0.0130               | 0.0000               | –                                  | 1.0000                                             | 2.0000   | 0.0228               |
| SE0800                                    | SERP0689 | 2.330294 | 771.377                        | 299.623  | 771.377                            | 299.623  | 772.466  | 298.534  | 3        | 0        | 0.0039               | 0.0000               | 0.0039               | 0.0000               | –                                  | 1.0000                                             | 1.7727   | 0.0381               |
| SE0265                                    | SERP2313 | 2.330294 | 74.756                         | 27.244   | 75.880                             | 26.120   | 76.406   | 25.594   | 3        | 0        | 0.0398               | 0.0000               | 0.0409               | 0.0000               | –                                  | 1.0000                                             | 1.7706   | 0.0383               |
| SE1546                                    | SERP1399 | 2.330294 | 681.315                        | 266.685  | 681.014                            | 266.986  | 682.253  | 265.747  | 3        | 0        | 0.0044               | 0.0000               | 0.0044               | 0.0000               | –                                  | 1.0000                                             | 1.7600   | 0.0392               |
| SE0378                                    | SERP0259 | 2.330294 | 79.979                         | 28.021   | 80.129                             | 27.871   | 81.142   | 26.858   | 3        | 0        | 0.0375               | 0.0000               | 0.0384               | 0.0000               | –                                  | 1.0000                                             | 1.7534   | 0.0398               |
| SE2085                                    | SERP2099 | 2.330294 | 1062.091                       | 425.909  | 1061.967                           | 426.033  | 1063.117 | 424.883  | 3        | 0        | 0.0028               | 0.0000               | 0.0028               | 0.0000               | –                                  | 1.0000                                             | 1.7500   | 0.0401               |
| SE1042                                    | SERP0931 | 2.330294 | 369.102                        | 143.898  | 369.102                            | 143.898  | 370.190  | 142.810  | 3        | 0        | 0.0081               | 0.0000               | 0.0082               | 0.0000               | –                                  | 1.0000                                             | 1.7447   | 0.0405               |
| SE0039                                    | SERP2495 | 2.330294 | 210.692                        | 83.308   | 211.469                            | 82.531   | 212.168  | 81.832   | 3        | 0        | 0.0142               | 0.0000               | 0.0143               | 0.0000               | –                                  | 1.0000                                             | 1.7439   | 0.0406               |
| SE0977                                    | SERP0866 | 2.330294 | 581.185                        | 240.815  | 580.185                            | 241.815  | 581.773  | 240.227  | 3        | 0        | 0.0052               | 0.0000               | 0.0052               | 0.0000               | –                                  | 1.0000                                             | 1.7333   | 0.0415               |
| SE1170                                    | SERP1049 | 2.330294 | 979.954                        | 397.046  | 978.954                            | 398.046  | 980.543  | 396.457  | 3        | 0        | 0.0031               | 0.0000               | 0.0031               | 0.0000               | –                                  | 1.0000                                             | 1.7222   | 0.0425               |
| SE0502                                    | SERP0385 | 2.330294 | 692.875                        | 279.125  | 692.274                            | 279.726  | 693.663  | 278.337  | 3        | 0        | 0.0043               | 0.0000               | 0.0043               | 0.0000               | –                                  | 1.0000                                             | 1.7200   | 0.0427               |
| SE0546                                    | SERP0431 | 2.330294 | 1028.104                       | 408.896  | 1028.104                           | 408.896  | 1029.192 | 407.808  | 3        | 0        | 0.0029               | 0.0000               | 0.0029               | 0.0000               | –                                  | 1.0000                                             | 1.7059   | 0.0440               |
| SE1302                                    | SERP1183 | 2.330294 | 1737.146                       | 692.854  | 1736.995                           | 693.005  | 1738.159 | 691.841  | 2        | 0        | 0.0012               | 0.0000               | 0.0012               | 0.0000               | –                                  | 1.0000                                             | 1.5000   | 0.0668               |
| SE1527                                    | SERP1382 | 2.330294 | 808.136                        | 319.864  | 810.235                            | 317.765  | 810.273  | 317.727  | 2        | 0        | 0.0025               | 0.0000               | 0.0025               | 0.0000               | –                                  | 1.0000                                             | 1.4706   | 0.0707               |
| SE2166                                    | SERP2177 | 2.330294 | 1062.813                       | 425.187  | 1062.663                           | 425.337  | 1063.826 | 424.174  | 2        | 0        | 0.0019               | 0.0000               | 0.0019               | 0.0000               | –                                  | 1.0000                                             | 1.4615   | 0.0719               |
| SE2379                                    | SERP0037 | 2.330294 | 776.000                        | 325.000  | 776.000                            | 325.000  | 777.089  | 323.911  | 2        | 0        | 0.0026               | 0.0000               | 0.0026               | 0.0000               | –                                  | 1.0000                                             | 1.4444   | 0.0743               |
| SE1828                                    | SERP1836 | 2.330294 | 1527.764                       | 605.236  | 1527.764                           | 605.236  | 1528.853 | 604.147  | 2        | 0        | 0.0013               | 0.0000               | 0.0013               | 0.0000               | –                                  | 1.0000                                             | 1.4444   | 0.0743               |
| SE1824                                    | SERP1831 | 2.330294 | 472.175                        | 187.825  | 471.476                            | 188.524  | 472.914  | 187.086  | 2        | 0        | 0.0042               | 0.0000               | 0.0043               | 0.0000               | –                                  | 1.0000                                             | 1.4333   | 0.0759               |
| SE0309                                    | SERP0186 | 2.330294 | 287.415                        | 123.585  | 287.239                            | 123.761  | 288.415  | 122.585  | 2        | 0        | 0.0070               | 0.0000               | 0.0070               | 0.0000               | –                                  | 1.0000                                             | 1.4286   | 0.0766               |
| SE0463                                    | SERP0349 | 2.330294 | 1003.008                       | 367.992  | 1002.407                           | 368.593  | 1003.796 | 367.204  | 2        | 0        | 0.0020               | 0.0000               | 0.0020               | 0.0000               | –                                  | 1.0000                                             | 1.4286   | 0.0766               |
| SE2067                                    | SERP2080 | 2.330294 | 1023.615                       | 413.385  | 1023.615                           | 413.385  | 1024.703 | 412.297  | 2        | 0        | 0.0020               | 0.0000               | 0.0020               | 0.0000               | –                                  | 1.0000                                             | 1.4286   | 0.0766               |
| SE2215                                    | SERP2247 | 2.330294 | 994.808                        | 406.192  | 994.658                            | 406.342  | 995.821  | 405.179  | 2        | 0        | 0.0020               | 0.0000               | 0.0020               | 0.0000               | –                                  | 1.0000                                             | 1.4286   | 0.0766               |
| SE0806                                    | SERP0695 | 2.330294 | 137.609                        | 51.391   | 137.759                            | 51.241   | 138.772  | 50.228   | 2        | 0        | 0.0145               | 0.0000               | 0.0147               | 0.0000               | –                                  | 1.0000                                             | 1.4272   | 0.0768               |
| SE1448                                    | SERP1335 | 2.330294 | 315.899                        | 125.101  | 315.599                            | 125.401  | 316.837  | 124.163  | 2        | 0        | 0.0063               | 0.0000               | 0.0064               | 0.0000               | –                                  | 1.0000                                             | 1.4222   | 0.0775               |
| SE0847                                    | SERP0737 | 2.330294 | 93.931                         | 38.069   | 93.931                             | 38.069   | 95.019   | 36.981   | 2        | 0        | 0.0213               | 0.0000               | 0.0216               | 0.0000               | –                                  | 1.0000                                             | 1.4211   | 0.0777               |
| SE0790                                    | SERP0679 | 2.330294 | 454.862                        | 169.138  | 455.162                            | 168.838  | 456.100  | 167.900  | 2        | 0        | 0.0044               | 0.0000               | 0.0044               | 0.0000               | –                                  | 1.0000                                             | 1.4194   | 0.0779               |
| SE2196                                    | SERP2207 | 2.330294 | 129.585                        | 47.415   | 130.035                            | 46.965   | 130.898  | 46.102   | 2        | 0        | 0.0154               | 0.0000               | 0.0156               | 0.0000               | –                                  | 1.0000                                             | 1.4182   | 0.0781               |
| SE2269                                    | SERP0153 | 2.330294 | 585.303                        | 230.697  | 584.303                            | 231.697  | 585.891  | 230.109  | 2        | 0        | 0.0034               | 0.0000               | 0.0034               | 0.0000               | –                                  | 1.0000                                             | 1.4167   | 0.0783               |
| SE0744                                    | SERP0630 | 2.330294 | 1181.679                       | 489.321  | 1182.378                           | 488.622  | 1183.117 | 487.883  | 2        | 0        | 0.0017               | 0.0000               | 0.0017               | 0.0000               | –                                  | 1.0000                                             | 1.4167   | 0.0783               |
| SE2003                                    | SERP2016 | 2.330294 | 584.037                        | 222.963  | 584.037                            | 222.963  | 585.125  | 221.875  | 2        | 0        | 0.0034               | 0.0000               | 0.0034               | 0.0000               | –                                  | 1.0000                                             | 1.4167   | 0.0783               |
| SE1247                                    | SERP1126 | 2.330294 | 491.554                        | 195.446  | 491.554                            | 195.446  | 492.643  | 194.357  | 2        | 0        | 0.0041               | 0.0000               | 0.0041               | 0.0000               | –                                  | 1.0000                                             | 1.4138   | 0.0787               |

|        |          |          |          |          |          |          |          |          |   |   |        |        |        |        |        |        |        |        |
|--------|----------|----------|----------|----------|----------|----------|----------|----------|---|---|--------|--------|--------|--------|--------|--------|--------|--------|
| SE1986 | SERP1998 | 2.330294 | 337.494  | 130.506  | 338.194  | 129.806  | 338.932  | 129.068  | 2 | 0 | 0.0059 | 0.0000 | 0.0059 | 0.0000 | -      | 1.0000 | 1.4048 | 0.0800 |
| SE0432 | SERP0317 | 2.330294 | 707.563  | 300.437  | 707.563  | 300.437  | 708.651  | 299.349  | 2 | 0 | 0.0028 | 0.0000 | 0.0028 | 0.0000 | -      | 1.0000 | 1.4000 | 0.0808 |
| SE1745 | SERP1754 | 2.330294 | 463.830  | 190.170  | 462.980  | 191.020  | 464.493  | 189.507  | 2 | 0 | 0.0043 | 0.0000 | 0.0043 | 0.0000 | -      | 1.0000 | 1.3871 | 0.0827 |
| SE0674 | SERP0564 | 2.330294 | 1860.768 | 746.232  | 1860.768 | 746.232  | 1861.856 | 745.144  | 2 | 0 | 0.0011 | 0.0000 | 0.0011 | 0.0000 | -      | 1.0000 | 1.3750 | 0.0846 |
| SE0773 | SERP0660 | 2.330294 | 601.031  | 235.969  | 601.332  | 235.668  | 602.270  | 234.730  | 2 | 0 | 0.0033 | 0.0000 | 0.0033 | 0.0000 | -      | 1.0000 | 1.3750 | 0.0846 |
| SE1608 | SERP1461 | 2.330294 | 601.546  | 241.454  | 601.696  | 241.304  | 602.709  | 240.291  | 2 | 0 | 0.0033 | 0.0000 | 0.0033 | 0.0000 | -      | 1.0000 | 1.3750 | 0.0846 |
| SE2128 | SERP2140 | 2.330294 | 1031.666 | 390.334  | 1032.366 | 389.634  | 1033.104 | 388.896  | 2 | 0 | 0.0019 | 0.0000 | 0.0019 | 0.0000 | -      | 1.0000 | 1.3571 | 0.0874 |
| SE0506 | SERP0389 | 2.330294 | 1859.618 | 747.382  | 1858.919 | 748.081  | 1860.357 | 746.643  | 7 | 1 | 0.0038 | 0.0013 | 0.0038 | 0.0013 | 2.9231 | 0.7451 | 1.3086 | 0.0953 |
| SE1371 | SERP1258 | 2.330294 | 800.387  | 318.613  | 800.687  | 318.313  | 801.625  | 317.375  | 1 | 0 | 0.0012 | 0.0000 | 0.0013 | 0.0000 | -      | 1.0000 | 1.0833 | 0.1393 |
| SE1926 | SERP1938 | 2.330294 | 690.396  | 254.604  | 689.997  | 255.003  | 691.285  | 253.715  | 1 | 0 | 0.0014 | 0.0000 | 0.0015 | 0.0000 | -      | 1.0000 | 1.0714 | 0.1420 |
| SE1792 | SERP1800 | 2.330294 | 571.242  | 229.758  | 571.942  | 229.058  | 572.680  | 228.320  | 1 | 0 | 0.0017 | 0.0000 | 0.0018 | 0.0000 | -      | 1.0000 | 1.0588 | 0.1448 |
| SE1195 | SERP1075 | 2.330294 | 308.350  | 126.650  | 308.350  | 126.650  | 309.438  | 125.562  | 1 | 0 | 0.0032 | 0.0000 | 0.0033 | 0.0000 | -      | 1.0000 | 1.0313 | 0.1512 |
| SE1256 | SERP1136 | 2.330294 | 253.319  | 100.681  | 253.319  | 100.681  | 254.407  | 99.593   | 1 | 0 | 0.0039 | 0.0000 | 0.0040 | 0.0000 | -      | 1.0000 | 1.0256 | 0.1525 |
| SE0417 | SERP0302 | 2.330294 | 100.885  | 46.115   | 100.584  | 46.416   | 101.823  | 45.177   | 1 | 0 | 0.0099 | 0.0000 | 0.0100 | 0.0000 | -      | 1.0000 | 1.0101 | 0.1562 |
| SE0246 | SERP2335 | 2.330294 | 68.005   | 24.995   | 68.306   | 24.694   | 69.244   | 23.756   | 1 | 0 | 0.0147 | 0.0000 | 0.0148 | 0.0000 | -      | 1.0000 | 1.0068 | 0.1570 |
| SE2364 | SERP0052 | 2.330294 | 421.127  | 166.873  | 421.604  | 166.396  | 422.454  | 165.546  | 6 | 1 | 0.0142 | 0.0060 | 0.0144 | 0.0060 | 2.4000 | 0.7059 | 1.0066 | 0.1571 |
| SE1189 | SERP1068 | 2.330294 | 65.756   | 27.244   | 66.456   | 26.544   | 67.194   | 25.806   | 1 | 0 | 0.0151 | 0.0000 | 0.0153 | 0.0000 | -      | 1.0000 | 1.0066 | 0.1571 |
| SE2403 | SERP0018 | 2.330294 | 1468.535 | 574.465  | 1468.535 | 574.465  | 1469.623 | 573.377  | 1 | 0 | 0.0007 | 0.0000 | 0.0007 | 0.0000 | -      | 1.0000 | 1.0000 | 0.1587 |
| SE2402 | SERP0019 | 2.330294 | 134.384  | 54.616   | 134.234  | 54.766   | 135.397  | 53.603   | 1 | 0 | 0.0074 | 0.0000 | 0.0075 | 0.0000 | -      | 1.0000 | 1.0000 | 0.1587 |
| SE2383 | SERP0033 | 2.330294 | 529.932  | 211.068  | 529.932  | 211.068  | 531.020  | 209.980  | 1 | 0 | 0.0019 | 0.0000 | 0.0019 | 0.0000 | -      | 1.0000 | 1.0000 | 0.1587 |
| SE2382 | SERP0034 | 2.330294 | 1584.792 | 659.208  | 1584.642 | 659.358  | 1585.805 | 658.195  | 1 | 0 | 0.0006 | 0.0000 | 0.0006 | 0.0000 | -      | 1.0000 | 1.0000 | 0.1587 |
| SE2360 | SERP0057 | 2.330294 | 449.738  | 171.262  | 449.738  | 171.262  | 450.826  | 170.174  | 1 | 0 | 0.0022 | 0.0000 | 0.0022 | 0.0000 | -      | 1.0000 | 1.0000 | 0.1587 |
| SE2357 | SERP0060 | 2.330294 | 402.809  | 164.191  | 402.809  | 164.191  | 403.898  | 163.102  | 1 | 0 | 0.0025 | 0.0000 | 0.0025 | 0.0000 | -      | 1.0000 | 1.0000 | 0.1587 |
| SE2352 | SERP0065 | 2.330294 | 474.857  | 188.143  | 474.857  | 188.143  | 475.946  | 187.054  | 1 | 0 | 0.0021 | 0.0000 | 0.0021 | 0.0000 | -      | 1.0000 | 1.0000 | 0.1587 |
| SE2335 | SERP0080 | 2.330294 | 851.217  | 348.783  | 851.217  | 348.783  | 852.305  | 347.695  | 1 | 0 | 0.0012 | 0.0000 | 0.0012 | 0.0000 | -      | 1.0000 | 1.0000 | 0.1587 |
| SE2333 | SERP0084 | 2.330294 | 1058.384 | 435.616  | 1058.684 | 435.316  | 1059.623 | 434.377  | 1 | 0 | 0.0009 | 0.0000 | 0.0009 | 0.0000 | -      | 1.0000 | 1.0000 | 0.1587 |
| SE2321 | SERP0098 | 2.330294 | 454.944  | 202.056  | 455.244  | 201.756  | 456.182  | 200.818  | 1 | 0 | 0.0022 | 0.0000 | 0.0022 | 0.0000 | -      | 1.0000 | 1.0000 | 0.1587 |
| SE2302 | SERP0119 | 2.330294 | 962.835  | 372.165  | 963.136  | 371.864  | 964.074  | 370.926  | 1 | 0 | 0.0010 | 0.0000 | 0.0010 | 0.0000 | -      | 1.0000 | 1.0000 | 0.1587 |
| SE2294 | SERP0127 | 2.330294 | 594.538  | 242.462  | 594.538  | 242.462  | 595.626  | 241.374  | 1 | 0 | 0.0017 | 0.0000 | 0.0017 | 0.0000 | -      | 1.0000 | 1.0000 | 0.1587 |
| SE2282 | SERP0139 | 2.330294 | 467.156  | 189.844  | 467.457  | 189.543  | 468.395  | 188.605  | 1 | 0 | 0.0021 | 0.0000 | 0.0021 | 0.0000 | -      | 1.0000 | 1.0000 | 0.1587 |
| SE2280 | SERP0141 | 2.330294 | 2498.416 | 1008.584 | 2498.416 | 1008.584 | 2499.504 | 1007.496 | 1 | 0 | 0.0004 | 0.0000 | 0.0004 | 0.0000 | -      | 1.0000 | 1.0000 | 0.1587 |
| SE0397 | SERP0281 | 2.330294 | 1689.249 | 710.751  | 1689.549 | 710.451  | 1690.487 | 709.513  | 1 | 0 | 0.0006 | 0.0000 | 0.0006 | 0.0000 | -      | 1.0000 | 1.0000 | 0.1587 |
| SE0409 | SERP0294 | 2.330294 | 521.554  | 222.446  | 520.854  | 223.146  | 522.292  | 221.708  | 1 | 0 | 0.0019 | 0.0000 | 0.0019 | 0.0000 | -      | 1.0000 | 1.0000 | 0.1587 |
| SE0418 | SERP0303 | 2.330294 | 1224.502 | 500.498  | 1224.202 | 500.798  | 1225.441 | 499.559  | 1 | 0 | 0.0008 | 0.0000 | 0.0008 | 0.0000 | -      | 1.0000 | 1.0000 | 0.1587 |
| SE0451 | SERP0336 | 2.330294 | 320.888  | 126.112  | 320.888  | 126.112  | 321.976  | 125.024  | 1 | 0 | 0.0031 | 0.0000 | 0.0031 | 0.0000 | -      | 1.0000 | 1.0000 | 0.1587 |
| SE0526 | SERP0411 | 2.330294 | 349.465  | 142.535  | 349.465  | 142.535  | 350.553  | 141.447  | 1 | 0 | 0.0029 | 0.0000 | 0.0029 | 0.0000 | -      | 1.0000 | 1.0000 | 0.1587 |
| SE0533 | SERP0418 | 2.330294 | 483.096  | 188.904  | 483.397  | 188.603  | 484.335  | 187.665  | 1 | 0 | 0.0021 | 0.0000 | 0.0021 | 0.0000 | -      | 1.0000 | 1.0000 | 0.1587 |
| SE0538 | SERP0423 | 2.330294 | 461.228  | 177.772  | 461.228  | 177.772  | 462.317  | 176.683  | 1 | 0 | 0.0022 | 0.0000 | 0.0022 | 0.0000 | -      | 1.0000 | 1.0000 | 0.1587 |
| SE0576 | SERP0463 | 2.330294 | 361.268  | 139.732  | 361.268  | 139.732  | 362.356  | 138.644  | 1 | 0 | 0.0028 | 0.0000 | 0.0028 | 0.0000 | -      | 1.0000 | 1.0000 | 0.1587 |

|        |          |          |          |         |          |         |          |         |   |   |        |        |        |        |   |        |        |        |
|--------|----------|----------|----------|---------|----------|---------|----------|---------|---|---|--------|--------|--------|--------|---|--------|--------|--------|
| SE0585 | SERP0474 | 2.330294 | 142.611  | 58.389  | 142.611  | 58.389  | 143.700  | 57.300  | 1 | 0 | 0.0070 | 0.0000 | 0.0070 | 0.0000 | - | 1.0000 | 1.0000 | 0.1587 |
| SE0596 | SERP0485 | 2.330294 | 271.271  | 106.729 | 271.121  | 106.879 | 272.284  | 105.716 | 1 | 0 | 0.0037 | 0.0000 | 0.0037 | 0.0000 | - | 1.0000 | 1.0000 | 0.1587 |
| SE0597 | SERP0486 | 2.330294 | 64.908   | 25.092  | 63.908   | 26.092  | 65.497   | 24.503  | 1 | 0 | 0.0155 | 0.0000 | 0.0157 | 0.0000 | - | 1.0000 | 1.0000 | 0.1587 |
| SE0608 | SERP0498 | 2.330294 | 886.178  | 352.822 | 886.178  | 352.822 | 887.266  | 351.734 | 1 | 0 | 0.0011 | 0.0000 | 0.0011 | 0.0000 | - | 1.0000 | 1.0000 | 0.1587 |
| SE0643 | SERP0535 | 2.330294 | 1040.061 | 453.939 | 1039.761 | 454.239 | 1040.999 | 453.001 | 1 | 0 | 0.0010 | 0.0000 | 0.0010 | 0.0000 | - | 1.0000 | 1.0000 | 0.1587 |
| SE0650 | SERP0542 | 2.330294 | 803.792  | 321.208 | 803.616  | 321.384 | 804.792  | 320.208 | 1 | 0 | 0.0012 | 0.0000 | 0.0012 | 0.0000 | - | 1.0000 | 1.0000 | 0.1587 |
| SE0680 | SERP0570 | 2.330294 | 647.337  | 276.663 | 647.337  | 276.663 | 648.425  | 275.575 | 1 | 0 | 0.0015 | 0.0000 | 0.0015 | 0.0000 | - | 1.0000 | 1.0000 | 0.1587 |
| SE0724 | SERP0612 | 2.330294 | 960.553  | 395.447 | 960.553  | 395.447 | 961.641  | 394.359 | 1 | 0 | 0.0010 | 0.0000 | 0.0010 | 0.0000 | - | 1.0000 | 1.0000 | 0.1587 |
| SE0740 | SERP0626 | 2.330294 | 398.027  | 156.973 | 398.027  | 156.973 | 399.116  | 155.884 | 1 | 0 | 0.0025 | 0.0000 | 0.0025 | 0.0000 | - | 1.0000 | 1.0000 | 0.1587 |
| SE0747 | SERP0633 | 2.330294 | 836.284  | 345.716 | 836.584  | 345.416 | 837.522  | 344.478 | 1 | 0 | 0.0012 | 0.0000 | 0.0012 | 0.0000 | - | 1.0000 | 1.0000 | 0.1587 |
| SE0754 | SERP0641 | 2.330294 | 858.953  | 341.047 | 859.254  | 340.746 | 860.192  | 339.808 | 1 | 0 | 0.0012 | 0.0000 | 0.0012 | 0.0000 | - | 1.0000 | 1.0000 | 0.1587 |
| SE0761 | SERP0648 | 2.330294 | 606.341  | 251.659 | 605.641  | 252.359 | 607.079  | 250.921 | 1 | 0 | 0.0017 | 0.0000 | 0.0017 | 0.0000 | - | 1.0000 | 1.0000 | 0.1587 |
| SE0762 | SERP0649 | 2.330294 | 345.620  | 134.380 | 345.620  | 134.380 | 346.708  | 133.292 | 1 | 0 | 0.0029 | 0.0000 | 0.0029 | 0.0000 | - | 1.0000 | 1.0000 | 0.1587 |
| SE0763 | SERP0650 | 2.330294 | 805.782  | 319.218 | 805.782  | 319.218 | 806.870  | 318.130 | 1 | 0 | 0.0012 | 0.0000 | 0.0012 | 0.0000 | - | 1.0000 | 1.0000 | 0.1587 |
| SE0767 | SERP0654 | 2.330294 | 1551.626 | 635.374 | 1551.325 | 635.675 | 1552.564 | 634.436 | 1 | 0 | 0.0006 | 0.0000 | 0.0006 | 0.0000 | - | 1.0000 | 1.0000 | 0.1587 |
| SE0779 | SERP0667 | 2.330294 | 830.675  | 339.325 | 830.675  | 339.325 | 831.763  | 338.237 | 1 | 0 | 0.0012 | 0.0000 | 0.0012 | 0.0000 | - | 1.0000 | 1.0000 | 0.1587 |
| SE0793 | SERP0682 | 2.330294 | 926.086  | 372.914 | 926.086  | 372.914 | 927.174  | 371.826 | 1 | 0 | 0.0011 | 0.0000 | 0.0011 | 0.0000 | - | 1.0000 | 1.0000 | 0.1587 |
| SE0797 | SERP0686 | 2.330294 | 783.804  | 308.196 | 784.104  | 307.896 | 785.042  | 306.958 | 1 | 0 | 0.0013 | 0.0000 | 0.0013 | 0.0000 | - | 1.0000 | 1.0000 | 0.1587 |
| SE0798 | SERP0687 | 2.330294 | 570.457  | 230.543 | 570.457  | 230.543 | 571.546  | 229.454 | 1 | 0 | 0.0018 | 0.0000 | 0.0018 | 0.0000 | - | 1.0000 | 1.0000 | 0.1587 |
| SE0911 | SERP0802 | 2.330294 | 232.416  | 97.584  | 233.116  | 96.884  | 233.854  | 96.146  | 1 | 0 | 0.0043 | 0.0000 | 0.0043 | 0.0000 | - | 1.0000 | 1.0000 | 0.1587 |
| SE0924 | SERP0814 | 2.330294 | 644.413  | 261.587 | 645.112  | 260.888 | 645.851  | 260.149 | 1 | 0 | 0.0016 | 0.0000 | 0.0016 | 0.0000 | - | 1.0000 | 1.0000 | 0.1587 |
| SE0942 | SERP0833 | 2.330294 | 863.097  | 357.903 | 862.397  | 358.603 | 863.835  | 357.165 | 1 | 0 | 0.0012 | 0.0000 | 0.0012 | 0.0000 | - | 1.0000 | 1.0000 | 0.1587 |
| SE0990 | SERP0879 | 2.330294 | 971.031  | 372.969 | 971.031  | 372.969 | 972.119  | 371.881 | 1 | 0 | 0.0010 | 0.0000 | 0.0010 | 0.0000 | - | 1.0000 | 1.0000 | 0.1587 |
| SE1023 | SERP0910 | 2.330294 | 169.139  | 61.861  | 168.989  | 62.011  | 170.152  | 60.848  | 1 | 0 | 0.0059 | 0.0000 | 0.0059 | 0.0000 | - | 1.0000 | 1.0000 | 0.1587 |
| SE1025 | SERP0912 | 2.330294 | 1412.937 | 573.063 | 1412.937 | 573.063 | 1414.025 | 571.975 | 1 | 0 | 0.0007 | 0.0000 | 0.0007 | 0.0000 | - | 1.0000 | 1.0000 | 0.1587 |
| SE1032 | SERP0921 | 2.330294 | 1908.027 | 794.973 | 1907.727 | 795.273 | 1908.965 | 794.035 | 1 | 0 | 0.0005 | 0.0000 | 0.0005 | 0.0000 | - | 1.0000 | 1.0000 | 0.1587 |
| SE1035 | SERP0924 | 2.330294 | 429.973  | 176.027 | 429.973  | 176.027 | 431.061  | 174.939 | 1 | 0 | 0.0023 | 0.0000 | 0.0023 | 0.0000 | - | 1.0000 | 1.0000 | 0.1587 |
| SE1038 | SERP0927 | 2.330294 | 1033.453 | 421.547 | 1033.453 | 421.547 | 1034.541 | 420.459 | 1 | 0 | 0.0010 | 0.0000 | 0.0010 | 0.0000 | - | 1.0000 | 1.0000 | 0.1587 |
| SE1048 | SERP0937 | 2.330294 | 1007.393 | 396.607 | 1007.393 | 396.607 | 1008.481 | 395.519 | 1 | 0 | 0.0010 | 0.0000 | 0.0010 | 0.0000 | - | 1.0000 | 1.0000 | 0.1587 |
| SE1058 | SERP0947 | 2.330294 | 894.313  | 356.687 | 895.013  | 355.987 | 895.751  | 355.249 | 1 | 0 | 0.0011 | 0.0000 | 0.0011 | 0.0000 | - | 1.0000 | 1.0000 | 0.1587 |
| SE1113 | SERP0996 | 2.330294 | 1059.924 | 413.076 | 1059.774 | 413.226 | 1060.938 | 412.062 | 1 | 0 | 0.0009 | 0.0000 | 0.0009 | 0.0000 | - | 1.0000 | 1.0000 | 0.1587 |
| SE1153 | SERP1034 | 2.330294 | 927.751  | 371.249 | 927.451  | 371.549 | 928.689  | 370.311 | 1 | 0 | 0.0011 | 0.0000 | 0.0011 | 0.0000 | - | 1.0000 | 1.0000 | 0.1587 |
| SE1171 | SERP1050 | 2.330294 | 687.200  | 272.800 | 686.900  | 273.100 | 688.138  | 271.862 | 1 | 0 | 0.0015 | 0.0000 | 0.0015 | 0.0000 | - | 1.0000 | 1.0000 | 0.1587 |
| SE1187 | SERP1066 | 2.330294 | 658.165  | 259.835 | 659.165  | 258.835 | 659.754  | 258.246 | 1 | 0 | 0.0015 | 0.0000 | 0.0015 | 0.0000 | - | 1.0000 | 1.0000 | 0.1587 |
| SE1191 | SERP1070 | 2.330294 | 1208.553 | 444.447 | 1208.703 | 444.297 | 1209.716 | 443.284 | 1 | 0 | 0.0008 | 0.0000 | 0.0008 | 0.0000 | - | 1.0000 | 1.0000 | 0.1587 |
| SE1193 | SERP1072 | 2.330294 | 804.873  | 317.127 | 804.697  | 317.303 | 805.873  | 316.127 | 1 | 0 | 0.0012 | 0.0000 | 0.0012 | 0.0000 | - | 1.0000 | 1.0000 | 0.1587 |
| SE1202 | SERP1082 | 2.330294 | 627.745  | 251.255 | 629.144  | 249.856 | 629.533  | 249.467 | 1 | 0 | 0.0016 | 0.0000 | 0.0016 | 0.0000 | - | 1.0000 | 1.0000 | 0.1587 |
| SE1212 | SERP1092 | 2.330294 | 727.894  | 295.106 | 726.795  | 296.205 | 728.433  | 294.567 | 1 | 0 | 0.0014 | 0.0000 | 0.0014 | 0.0000 | - | 1.0000 | 1.0000 | 0.1587 |
| SE1213 | SERP1093 | 2.330294 | 394.497  | 160.503 | 394.497  | 160.503 | 395.586  | 159.414 | 1 | 0 | 0.0025 | 0.0000 | 0.0025 | 0.0000 | - | 1.0000 | 1.0000 | 0.1587 |

|        |          |          |          |         |          |         |          |         |   |   |        |        |        |        |   |        |        |        |
|--------|----------|----------|----------|---------|----------|---------|----------|---------|---|---|--------|--------|--------|--------|---|--------|--------|--------|
| SE1218 | SERP1098 | 2.330294 | 275.164  | 108.836 | 275.164  | 108.836 | 276.253  | 107.747 | 1 | 0 | 0.0036 | 0.0000 | 0.0036 | 0.0000 | - | 1.0000 | 1.0000 | 0.1587 |
| SE1246 | SERP1125 | 2.330294 | 793.561  | 304.439 | 793.261  | 304.739 | 794.499  | 303.501 | 1 | 0 | 0.0013 | 0.0000 | 0.0013 | 0.0000 | - | 1.0000 | 1.0000 | 0.1587 |
| SE1254 | SERP1134 | 2.330294 | 653.323  | 243.677 | 653.323  | 243.677 | 654.412  | 242.588 | 1 | 0 | 0.0015 | 0.0000 | 0.0015 | 0.0000 | - | 1.0000 | 1.0000 | 0.1587 |
| SE1257 | SERP1137 | 2.330294 | 335.077  | 129.923 | 335.777  | 129.223 | 336.515  | 128.485 | 1 | 0 | 0.0030 | 0.0000 | 0.0030 | 0.0000 | - | 1.0000 | 1.0000 | 0.1587 |
| SE1270 | SERP1151 | 2.330294 | 804.926  | 317.074 | 804.926  | 317.074 | 806.014  | 315.986 | 1 | 0 | 0.0012 | 0.0000 | 0.0012 | 0.0000 | - | 1.0000 | 1.0000 | 0.1587 |
| SE1278 | SERP1159 | 2.330294 | 254.742  | 96.258  | 254.742  | 96.258  | 255.830  | 95.170  | 1 | 0 | 0.0039 | 0.0000 | 0.0039 | 0.0000 | - | 1.0000 | 1.0000 | 0.1587 |
| SE1291 | SERP1172 | 2.330294 | 528.854  | 200.146 | 528.854  | 200.146 | 529.942  | 199.058 | 1 | 0 | 0.0019 | 0.0000 | 0.0019 | 0.0000 | - | 1.0000 | 1.0000 | 0.1587 |
| SE1306 | SERP1187 | 2.330294 | 702.417  | 290.583 | 702.417  | 290.583 | 703.506  | 289.494 | 1 | 0 | 0.0014 | 0.0000 | 0.0014 | 0.0000 | - | 1.0000 | 1.0000 | 0.1587 |
| SE1313 | SERP1194 | 2.330294 | 623.910  | 249.090 | 623.910  | 249.090 | 624.998  | 248.002 | 1 | 0 | 0.0016 | 0.0000 | 0.0016 | 0.0000 | - | 1.0000 | 1.0000 | 0.1587 |
| SE1320 | SERP1201 | 2.330294 | 1614.827 | 674.173 | 1615.127 | 673.873 | 1616.065 | 672.935 | 1 | 0 | 0.0006 | 0.0000 | 0.0006 | 0.0000 | - | 1.0000 | 1.0000 | 0.1587 |
| SE1327 | SERP1208 | 2.330294 | 914.910  | 375.090 | 914.511  | 375.489 | 915.799  | 374.201 | 1 | 0 | 0.0011 | 0.0000 | 0.0011 | 0.0000 | - | 1.0000 | 1.0000 | 0.1587 |
| SE1337 | SERP1226 | 2.330294 | 502.642  | 205.358 | 501.642  | 206.358 | 503.231  | 204.769 | 1 | 0 | 0.0020 | 0.0000 | 0.0020 | 0.0000 | - | 1.0000 | 1.0000 | 0.1587 |
| SE1346 | SERP1235 | 2.330294 | 577.988  | 232.012 | 577.688  | 232.312 | 578.926  | 231.074 | 1 | 0 | 0.0017 | 0.0000 | 0.0017 | 0.0000 | - | 1.0000 | 1.0000 | 0.1587 |
| SE1347 | SERP1236 | 2.330294 | 951.237  | 392.763 | 951.237  | 392.763 | 952.325  | 391.675 | 1 | 0 | 0.0011 | 0.0000 | 0.0011 | 0.0000 | - | 1.0000 | 1.0000 | 0.1587 |
| SE1352 | SERP1241 | 2.330294 | 441.704  | 167.296 | 441.404  | 167.596 | 442.642  | 166.358 | 1 | 0 | 0.0023 | 0.0000 | 0.0023 | 0.0000 | - | 1.0000 | 1.0000 | 0.1587 |
| SE1357 | SERP1246 | 2.330294 | 1392.464 | 542.536 | 1392.464 | 542.536 | 1393.552 | 541.448 | 1 | 0 | 0.0007 | 0.0000 | 0.0007 | 0.0000 | - | 1.0000 | 1.0000 | 0.1587 |
| SE1365 | SERP1252 | 2.330294 | 439.454  | 169.546 | 439.454  | 169.546 | 440.542  | 168.458 | 1 | 0 | 0.0023 | 0.0000 | 0.0023 | 0.0000 | - | 1.0000 | 1.0000 | 0.1587 |
| SE1388 | SERP1276 | 2.330294 | 674.076  | 270.924 | 674.376  | 270.624 | 675.314  | 269.686 | 1 | 0 | 0.0015 | 0.0000 | 0.0015 | 0.0000 | - | 1.0000 | 1.0000 | 0.1587 |
| SE1393 | SERP1281 | 2.330294 | 1213.423 | 478.577 | 1213.247 | 478.753 | 1214.423 | 477.577 | 1 | 0 | 0.0008 | 0.0000 | 0.0008 | 0.0000 | - | 1.0000 | 1.0000 | 0.1587 |
| SE1446 | SERP1333 | 2.330294 | 341.751  | 135.249 | 341.574  | 135.426 | 342.751  | 134.249 | 1 | 0 | 0.0029 | 0.0000 | 0.0029 | 0.0000 | - | 1.0000 | 1.0000 | 0.1587 |
| SE1465 | SERP1359 | 2.330294 | 101.236  | 42.764  | 102.236  | 41.764  | 102.824  | 41.176  | 1 | 0 | 0.0098 | 0.0000 | 0.0099 | 0.0000 | - | 1.0000 | 1.0000 | 0.1587 |
| SE1519 | SERP1374 | 2.330294 | 266.669  | 102.331 | 266.669  | 102.331 | 267.757  | 101.243 | 1 | 0 | 0.0037 | 0.0000 | 0.0038 | 0.0000 | - | 1.0000 | 1.0000 | 0.1587 |
| SE1526 | SERP1381 | 2.330294 | 252.196  | 89.804  | 252.196  | 89.804  | 253.285  | 88.715  | 1 | 0 | 0.0040 | 0.0000 | 0.0040 | 0.0000 | - | 1.0000 | 1.0000 | 0.1587 |
| SE1530 | SERP1385 | 2.330294 | 806.130  | 324.870 | 805.830  | 325.170 | 807.068  | 323.932 | 1 | 0 | 0.0012 | 0.0000 | 0.0012 | 0.0000 | - | 1.0000 | 1.0000 | 0.1587 |
| SE1541 | SERP1395 | 2.330294 | 1040.239 | 414.761 | 1039.939 | 415.061 | 1041.177 | 413.823 | 1 | 0 | 0.0010 | 0.0000 | 0.0010 | 0.0000 | - | 1.0000 | 1.0000 | 0.1587 |
| SE1543 | SERP1397 | 2.330294 | 609.828  | 236.172 | 609.828  | 236.172 | 610.916  | 235.084 | 1 | 0 | 0.0016 | 0.0000 | 0.0016 | 0.0000 | - | 1.0000 | 1.0000 | 0.1587 |
| SE1547 | SERP1400 | 2.330294 | 331.548  | 124.452 | 330.848  | 125.152 | 332.286  | 123.714 | 1 | 0 | 0.0030 | 0.0000 | 0.0030 | 0.0000 | - | 1.0000 | 1.0000 | 0.1587 |
| SE1553 | SERP1407 | 2.330294 | 697.163  | 274.837 | 697.463  | 274.537 | 698.401  | 273.599 | 1 | 0 | 0.0014 | 0.0000 | 0.0014 | 0.0000 | - | 1.0000 | 1.0000 | 0.1587 |
| SE1565 | SERP1418 | 2.330294 | 157.408  | 55.592  | 157.108  | 55.892  | 158.346  | 54.654  | 1 | 0 | 0.0064 | 0.0000 | 0.0064 | 0.0000 | - | 1.0000 | 1.0000 | 0.1587 |
| SE1568 | SERP1421 | 2.330294 | 833.530  | 342.470 | 833.530  | 342.470 | 834.618  | 341.382 | 1 | 0 | 0.0012 | 0.0000 | 0.0012 | 0.0000 | - | 1.0000 | 1.0000 | 0.1587 |
| SE1578 | SERP1431 | 2.330294 | 356.780  | 141.220 | 357.080  | 140.920 | 358.018  | 139.982 | 1 | 0 | 0.0028 | 0.0000 | 0.0028 | 0.0000 | - | 1.0000 | 1.0000 | 0.1587 |
| SE1590 | SERP1443 | 2.330294 | 1575.717 | 611.283 | 1575.717 | 611.283 | 1576.805 | 610.195 | 1 | 0 | 0.0006 | 0.0000 | 0.0006 | 0.0000 | - | 1.0000 | 1.0000 | 0.1587 |
| SE1600 | SERP1453 | 2.330294 | 787.576  | 307.424 | 787.876  | 307.124 | 788.814  | 306.186 | 1 | 0 | 0.0013 | 0.0000 | 0.0013 | 0.0000 | - | 1.0000 | 1.0000 | 0.1587 |
| SE1601 | SERP1454 | 2.330294 | 395.205  | 156.795 | 395.205  | 156.795 | 396.293  | 155.707 | 1 | 0 | 0.0025 | 0.0000 | 0.0025 | 0.0000 | - | 1.0000 | 1.0000 | 0.1587 |
| SE1602 | SERP1455 | 2.330294 | 662.297  | 264.703 | 661.997  | 265.003 | 663.235  | 263.765 | 1 | 0 | 0.0015 | 0.0000 | 0.0015 | 0.0000 | - | 1.0000 | 1.0000 | 0.1587 |
| SE1631 | SERP1486 | 2.330294 | 529.855  | 208.145 | 529.855  | 208.145 | 530.943  | 207.057 | 1 | 0 | 0.0019 | 0.0000 | 0.0019 | 0.0000 | - | 1.0000 | 1.0000 | 0.1587 |
| SE1644 | SERP1498 | 2.330294 | 895.974  | 352.026 | 895.974  | 352.026 | 897.062  | 350.938 | 1 | 0 | 0.0011 | 0.0000 | 0.0011 | 0.0000 | - | 1.0000 | 1.0000 | 0.1587 |
| SE1647 | SERP1657 | 2.330294 | 452.701  | 180.299 | 452.002  | 180.998 | 453.440  | 179.560 | 1 | 0 | 0.0022 | 0.0000 | 0.0022 | 0.0000 | - | 1.0000 | 1.0000 | 0.1587 |
| SE1649 | SERP1660 | 2.330294 | 1157.285 | 456.715 | 1157.162 | 456.838 | 1158.312 | 455.688 | 1 | 0 | 0.0009 | 0.0000 | 0.0009 | 0.0000 | - | 1.0000 | 1.0000 | 0.1587 |

|        |          |          |          |         |          |         |          |         |   |   |        |        |        |        |   |        |        |        |
|--------|----------|----------|----------|---------|----------|---------|----------|---------|---|---|--------|--------|--------|--------|---|--------|--------|--------|
| SE1659 | SERP1670 | 2.330294 | 729.525  | 311.475 | 729.525  | 311.475 | 730.614  | 310.386 | 1 | 0 | 0.0014 | 0.0000 | 0.0014 | 0.0000 | - | 1.0000 | 1.0000 | 0.1587 |
| SE1678 | SERP1687 | 2.330294 | 339.669  | 137.331 | 339.669  | 137.331 | 340.757  | 136.243 | 1 | 0 | 0.0029 | 0.0000 | 0.0029 | 0.0000 | - | 1.0000 | 1.0000 | 0.1587 |
| SE1689 | SERP1697 | 2.330294 | 631.222  | 238.778 | 631.222  | 238.778 | 632.310  | 237.690 | 1 | 0 | 0.0016 | 0.0000 | 0.0016 | 0.0000 | - | 1.0000 | 1.0000 | 0.1587 |
| SE1695 | SERP1703 | 2.330294 | 286.692  | 106.308 | 286.843  | 106.157 | 287.856  | 105.144 | 1 | 0 | 0.0035 | 0.0000 | 0.0035 | 0.0000 | - | 1.0000 | 1.0000 | 0.1587 |
| SE1699 | SERP1708 | 2.330294 | 285.961  | 116.039 | 285.961  | 116.039 | 287.049  | 114.951 | 1 | 0 | 0.0035 | 0.0000 | 0.0035 | 0.0000 | - | 1.0000 | 1.0000 | 0.1587 |
| SE1722 | SERP1731 | 2.330294 | 892.726  | 364.274 | 892.903  | 364.097 | 893.902  | 363.098 | 1 | 0 | 0.0011 | 0.0000 | 0.0011 | 0.0000 | - | 1.0000 | 1.0000 | 0.1587 |
| SE1733 | SERP1742 | 2.330294 | 241.211  | 106.789 | 241.061  | 106.939 | 242.224  | 105.776 | 1 | 0 | 0.0041 | 0.0000 | 0.0042 | 0.0000 | - | 1.0000 | 1.0000 | 0.1587 |
| SE1738 | SERP1748 | 2.330294 | 322.175  | 121.825 | 322.175  | 121.825 | 323.263  | 120.737 | 1 | 0 | 0.0031 | 0.0000 | 0.0031 | 0.0000 | - | 1.0000 | 1.0000 | 0.1587 |
| SE1761 | SERP1770 | 2.330294 | 846.640  | 338.360 | 846.640  | 338.360 | 847.729  | 337.271 | 1 | 0 | 0.0012 | 0.0000 | 0.0012 | 0.0000 | - | 1.0000 | 1.0000 | 0.1587 |
| SE1770 | SERP1779 | 2.330294 | 1256.811 | 498.189 | 1256.961 | 498.039 | 1257.974 | 497.026 | 1 | 0 | 0.0008 | 0.0000 | 0.0008 | 0.0000 | - | 1.0000 | 1.0000 | 0.1587 |
| SE1777 | SERP1785 | 2.330294 | 723.623  | 284.377 | 723.623  | 284.377 | 724.711  | 283.289 | 1 | 0 | 0.0014 | 0.0000 | 0.0014 | 0.0000 | - | 1.0000 | 1.0000 | 0.1587 |
| SE1789 | SERP1797 | 2.330294 | 530.915  | 207.085 | 530.614  | 207.386 | 531.853  | 206.147 | 1 | 0 | 0.0019 | 0.0000 | 0.0019 | 0.0000 | - | 1.0000 | 1.0000 | 0.1587 |
| SE1830 | SERP1839 | 2.330294 | 570.006  | 218.994 | 570.307  | 218.693 | 571.245  | 217.755 | 1 | 0 | 0.0018 | 0.0000 | 0.0018 | 0.0000 | - | 1.0000 | 1.0000 | 0.1587 |
| SE1832 | SERP1841 | 2.330294 | 119.361  | 48.639  | 119.061  | 48.939  | 120.299  | 47.701  | 1 | 0 | 0.0084 | 0.0000 | 0.0084 | 0.0000 | - | 1.0000 | 1.0000 | 0.1587 |
| SE1836 | SERP1845 | 2.330294 | 549.383  | 209.617 | 549.683  | 209.317 | 550.621  | 208.379 | 1 | 0 | 0.0018 | 0.0000 | 0.0018 | 0.0000 | - | 1.0000 | 1.0000 | 0.1587 |
| SE1857 | SERP1865 | 2.330294 | 671.570  | 267.430 | 671.720  | 267.280 | 672.733  | 266.267 | 1 | 0 | 0.0015 | 0.0000 | 0.0015 | 0.0000 | - | 1.0000 | 1.0000 | 0.1587 |
| SE1865 | SERP1873 | 2.330294 | 495.659  | 191.341 | 495.659  | 191.341 | 496.747  | 190.253 | 1 | 0 | 0.0020 | 0.0000 | 0.0020 | 0.0000 | - | 1.0000 | 1.0000 | 0.1587 |
| SE1884 | SERP1894 | 2.330294 | 588.660  | 224.340 | 588.660  | 224.340 | 589.748  | 223.252 | 1 | 0 | 0.0017 | 0.0000 | 0.0017 | 0.0000 | - | 1.0000 | 1.0000 | 0.1587 |
| SE1891 | SERP1901 | 2.330294 | 617.396  | 252.604 | 617.396  | 252.604 | 618.484  | 251.516 | 1 | 0 | 0.0016 | 0.0000 | 0.0016 | 0.0000 | - | 1.0000 | 1.0000 | 0.1587 |
| SE1895 | SERP1907 | 2.330294 | 452.936  | 180.064 | 452.936  | 180.064 | 454.024  | 178.976 | 1 | 0 | 0.0022 | 0.0000 | 0.0022 | 0.0000 | - | 1.0000 | 1.0000 | 0.1587 |
| SE1914 | SERP1927 | 2.330294 | 1154.297 | 453.703 | 1153.996 | 454.004 | 1155.235 | 452.765 | 1 | 0 | 0.0009 | 0.0000 | 0.0009 | 0.0000 | - | 1.0000 | 1.0000 | 0.1587 |
| SE1920 | SERP1932 | 2.330294 | 581.418  | 219.582 | 581.268  | 219.732 | 582.431  | 218.569 | 1 | 0 | 0.0017 | 0.0000 | 0.0017 | 0.0000 | - | 1.0000 | 1.0000 | 0.1587 |
| SE1976 | SERP1988 | 2.330294 | 662.172  | 270.828 | 662.172  | 270.828 | 663.260  | 269.740 | 1 | 0 | 0.0015 | 0.0000 | 0.0015 | 0.0000 | - | 1.0000 | 1.0000 | 0.1587 |
| SE1979 | SERP1992 | 2.330294 | 512.304  | 204.696 | 512.304  | 204.696 | 513.393  | 203.607 | 1 | 0 | 0.0020 | 0.0000 | 0.0020 | 0.0000 | - | 1.0000 | 1.0000 | 0.1587 |
| SE1993 | SERP2005 | 2.330294 | 561.913  | 224.087 | 561.913  | 224.087 | 563.001  | 222.999 | 1 | 0 | 0.0018 | 0.0000 | 0.0018 | 0.0000 | - | 1.0000 | 1.0000 | 0.1587 |
| SE1995 | SERP2007 | 2.330294 | 484.083  | 199.917 | 484.383  | 199.617 | 485.321  | 198.679 | 1 | 0 | 0.0021 | 0.0000 | 0.0021 | 0.0000 | - | 1.0000 | 1.0000 | 0.1587 |
| SE2015 | SERP2028 | 2.330294 | 488.001  | 204.999 | 487.701  | 205.299 | 488.939  | 204.061 | 1 | 0 | 0.0020 | 0.0000 | 0.0021 | 0.0000 | - | 1.0000 | 1.0000 | 0.1587 |
| SE2045 | SERP2058 | 2.330294 | 1098.445 | 440.555 | 1098.745 | 440.255 | 1099.683 | 439.317 | 1 | 0 | 0.0009 | 0.0000 | 0.0009 | 0.0000 | - | 1.0000 | 1.0000 | 0.1587 |
| SE2051 | SERP2064 | 2.330294 | 656.352  | 258.648 | 656.175  | 258.825 | 657.351  | 257.649 | 1 | 0 | 0.0015 | 0.0000 | 0.0015 | 0.0000 | - | 1.0000 | 1.0000 | 0.1587 |
| SE2060 | SERP2073 | 2.330294 | 537.186  | 227.814 | 537.186  | 227.814 | 538.274  | 226.726 | 1 | 0 | 0.0019 | 0.0000 | 0.0019 | 0.0000 | - | 1.0000 | 1.0000 | 0.1587 |
| SE2073 | SERP2086 | 2.330294 | 475.381  | 184.619 | 475.682  | 184.318 | 476.620  | 183.380 | 1 | 0 | 0.0021 | 0.0000 | 0.0021 | 0.0000 | - | 1.0000 | 1.0000 | 0.1587 |
| SE2090 | SERP2104 | 2.330294 | 123.660  | 50.340  | 123.960  | 50.040  | 124.898  | 49.102  | 1 | 0 | 0.0081 | 0.0000 | 0.0081 | 0.0000 | - | 1.0000 | 1.0000 | 0.1587 |
| SE2110 | SERP2122 | 2.330294 | 833.730  | 330.270 | 833.430  | 330.570 | 834.668  | 329.332 | 1 | 0 | 0.0012 | 0.0000 | 0.0012 | 0.0000 | - | 1.0000 | 1.0000 | 0.1587 |
| SE2121 | SERP2133 | 2.330294 | 710.616  | 285.384 | 710.316  | 285.684 | 711.554  | 284.446 | 1 | 0 | 0.0014 | 0.0000 | 0.0014 | 0.0000 | - | 1.0000 | 1.0000 | 0.1587 |
| SE2125 | SERP2137 | 2.330294 | 1293.172 | 512.828 | 1293.172 | 512.828 | 1294.260 | 511.740 | 1 | 0 | 0.0008 | 0.0000 | 0.0008 | 0.0000 | - | 1.0000 | 1.0000 | 0.1587 |
| SE2129 | SERP2141 | 2.330294 | 751.211  | 304.789 | 751.911  | 304.089 | 752.649  | 303.351 | 1 | 0 | 0.0013 | 0.0000 | 0.0013 | 0.0000 | - | 1.0000 | 1.0000 | 0.1587 |
| SE2131 | SERP2143 | 2.330294 | 613.459  | 241.541 | 613.609  | 241.391 | 614.622  | 240.378 | 1 | 0 | 0.0016 | 0.0000 | 0.0016 | 0.0000 | - | 1.0000 | 1.0000 | 0.1587 |
| SE2135 | SERP2147 | 2.330294 | 517.221  | 196.779 | 517.221  | 196.779 | 518.309  | 195.691 | 1 | 0 | 0.0019 | 0.0000 | 0.0019 | 0.0000 | - | 1.0000 | 1.0000 | 0.1587 |
| SE2165 | SERP2176 | 2.330294 | 1226.208 | 489.792 | 1226.058 | 489.942 | 1227.221 | 488.779 | 1 | 0 | 0.0008 | 0.0000 | 0.0008 | 0.0000 | - | 1.0000 | 1.0000 | 0.1587 |

|        |          |          |          |          |          |          |          |          |     |     |        |        |        |        |        |        |         |        |
|--------|----------|----------|----------|----------|----------|----------|----------|----------|-----|-----|--------|--------|--------|--------|--------|--------|---------|--------|
| SE2174 | SERP2185 | 2.330294 | 427.575  | 169.425  | 427.875  | 169.125  | 428.813  | 168.187  | 1   | 0   | 0.0023 | 0.0000 | 0.0023 | 0.0000 | -      | 1.0000 | 1.0000  | 0.1587 |
| SE2179 | SERP2190 | 2.330294 | 1228.258 | 487.742  | 1228.258 | 487.742  | 1229.346 | 486.654  | 1   | 0   | 0.0008 | 0.0000 | 0.0008 | 0.0000 | -      | 1.0000 | 1.0000  | 0.1587 |
| SE2180 | SERP2191 | 2.330294 | 1314.062 | 527.938  | 1313.912 | 528.088  | 1315.075 | 526.925  | 1   | 0   | 0.0008 | 0.0000 | 0.0008 | 0.0000 | -      | 1.0000 | 1.0000  | 0.1587 |
| SE2181 | SERP2192 | 2.330294 | 524.643  | 204.357  | 524.643  | 204.357  | 525.731  | 203.269  | 1   | 0   | 0.0019 | 0.0000 | 0.0019 | 0.0000 | -      | 1.0000 | 1.0000  | 0.1587 |
| SE2240 | SERP2272 | 2.330294 | 342.679  | 134.321  | 342.679  | 134.321  | 343.767  | 133.233  | 1   | 0   | 0.0029 | 0.0000 | 0.0029 | 0.0000 | -      | 1.0000 | 1.0000  | 0.1587 |
| SE2243 | SERP2275 | 2.330294 | 1077.919 | 428.081  | 1077.919 | 428.081  | 1079.007 | 426.993  | 1   | 0   | 0.0009 | 0.0000 | 0.0009 | 0.0000 | -      | 1.0000 | 1.0000  | 0.1587 |
| SE2253 | SERP2283 | 2.330294 | 575.284  | 237.716  | 574.434  | 238.566  | 575.947  | 237.053  | 1   | 0   | 0.0017 | 0.0000 | 0.0017 | 0.0000 | -      | 1.0000 | 1.0000  | 0.1587 |
| SE0261 | SERP2317 | 2.330294 | 454.230  | 181.770  | 453.530  | 182.470  | 454.968  | 181.032  | 1   | 0   | 0.0022 | 0.0000 | 0.0022 | 0.0000 | -      | 1.0000 | 1.0000  | 0.1587 |
| SE0228 | SERP2352 | 2.330294 | 657.696  | 272.304  | 657.696  | 272.304  | 658.784  | 271.216  | 1   | 0   | 0.0015 | 0.0000 | 0.0015 | 0.0000 | -      | 1.0000 | 1.0000  | 0.1587 |
| SE0011 | SERP2541 | 2.330294 | 682.245  | 283.755  | 681.945  | 284.055  | 683.183  | 282.817  | 1   | 0   | 0.0015 | 0.0000 | 0.0015 | 0.0000 | -      | 1.0000 | 1.0000  | 0.1587 |
| SE1206 | SERP1086 | 2.330294 | 256.442  | 103.558  | 256.141  | 103.859  | 256.792  | 103.208  | 2   | 0   | 0.0078 | 0.0000 | 0.0078 | 0.0000 | -      | 1.0000 | 0.9873  | 0.1617 |
| SE1998 | SERP2010 | 2.330294 | 1064.360 | 405.640  | 1063.811 | 406.189  | 1065.174 | 404.826  | 6   | 1   | 0.0056 | 0.0025 | 0.0057 | 0.0025 | 2.2800 | 0.6951 | 0.9420  | 0.1731 |
| SE2163 | SERP2174 | 2.330294 | 154.088  | 61.912   | 152.565  | 63.435   | 154.415  | 61.585   | 5   | 1   | 0.0326 | 0.0160 | 0.0333 | 0.0161 | 2.0683 | 0.6741 | 0.7941  | 0.2136 |
| SE1730 | SERP1739 | 2.330294 | 847.384  | 340.616  | 848.184  | 339.816  | 848.872  | 339.128  | 5   | 1   | 0.0059 | 0.0029 | 0.0059 | 0.0029 | 2.0345 | 0.6705 | 0.7702  | 0.2206 |
| SE1378 | SERP1266 | 2.330294 | 2291.086 | 903.914  | 2291.387 | 903.613  | 2292.325 | 902.675  | 5   | 1   | 0.0022 | 0.0011 | 0.0022 | 0.0011 | 2.0000 | 0.6667 | 0.7399  | 0.2297 |
| SE1020 | SERP0907 | 2.330294 | 736.021  | 286.979  | 738.447  | 284.553  | 738.322  | 284.678  | 5   | 1   | 0.0068 | 0.0035 | 0.0068 | 0.0035 | 1.9429 | 0.6602 | 0.7159  | 0.2370 |
| SE1429 | SERP1316 | 2.330294 | 7983.041 | 3092.959 | 7984.041 | 3091.959 | 7984.629 | 3091.371 | 14  | 4   | 0.0018 | 0.0013 | 0.0018 | 0.0013 | 1.3846 | 0.5806 | 0.6402  | 0.2610 |
| SE0601 | SERP0490 | 2.330294 | 485.697  | 207.303  | 486.148  | 206.852  | 487.011  | 205.989  | 4   | 1   | 0.0082 | 0.0048 | 0.0083 | 0.0048 | 1.7292 | 0.6336 | 0.5544  | 0.2896 |
| SE2097 | SERP2111 | 2.330294 | 234.267  | 89.733   | 234.868  | 89.132   | 234.567  | 89.433   | 2.5 | 0.5 | 0.0107 | 0.0056 | 0.0107 | 0.0056 | 1.9107 | 0.6564 | 0.5357  | 0.2961 |
| SE2415 | SERP0005 | 2.330294 | 507.535  | 209.465  | 506.835  | 210.165  | 508.273  | 208.727  | 4   | 1   | 0.0079 | 0.0048 | 0.0079 | 0.0048 | 1.6458 | 0.6220 | 0.5012  | 0.3081 |
| SE2408 | SERP0013 | 2.330294 | 451.202  | 175.798  | 451.301  | 175.699  | 452.340  | 174.660  | 4   | 1   | 0.0089 | 0.0057 | 0.0089 | 0.0057 | 1.5614 | 0.6096 | 0.4444  | 0.3284 |
| SE2013 | SERP2026 | 2.330294 | 317.426  | 138.574  | 318.126  | 137.874  | 318.864  | 137.136  | 3   | 1   | 0.0094 | 0.0072 | 0.0095 | 0.0073 | 1.3014 | 0.5655 | 0.2407  | 0.4049 |
| SE1514 | SERP1369 | 2.330294 | 356.152  | 144.848  | 355.675  | 145.325  | 357.002  | 143.998  | 3   | 1   | 0.0084 | 0.0069 | 0.0085 | 0.0069 | 1.2319 | 0.5519 | 0.1891  | 0.4250 |
| SE2186 | SERP2197 | 2.330294 | 540.390  | 206.610  | 540.089  | 206.911  | 541.328  | 205.672  | 6   | 2   | 0.0111 | 0.0097 | 0.0112 | 0.0097 | 1.1546 | 0.5359 | 0.1821  | 0.4278 |
| SE1963 | SERP1974 | 2.330294 | 259.343  | 88.657   | 259.193  | 88.807   | 260.356  | 87.644   | 3   | 1   | 0.0116 | 0.0113 | 0.0117 | 0.0114 | 1.0263 | 0.5065 | 0.0227  | 0.4909 |
| SE2007 | SERP2019 | 2.330294 | 1085.077 | 429.923  | 1084.677 | 430.323  | 1085.965 | 429.035  | 5   | 2   | 0.0046 | 0.0046 | 0.0046 | 0.0047 | 0.9787 | 0.4946 | -0.0256 | 0.5102 |
| SE1598 | SERP1451 | 2.330294 | 767.049  | 297.951  | 767.499  | 297.501  | 767.274  | 297.726  | 5   | 2   | 0.0065 | 0.0067 | 0.0065 | 0.0067 | 0.9701 | 0.4924 | -0.0337 | 0.5134 |
| SE2338 | SERP0077 | 2.330294 | 83.753   | 30.247   | 84.103   | 29.897   | 85.016   | 28.984   | 5   | 2   | 0.0596 | 0.0665 | 0.0621 | 0.0696 | 0.8922 | 0.4715 | -0.1333 | 0.5530 |
| SE1011 | SERP0899 | 2.330294 | 648.610  | 269.390  | 648.911  | 269.089  | 649.849  | 268.151  | 2   | 1   | 0.0031 | 0.0037 | 0.0031 | 0.0037 | 0.8378 | 0.4559 | -0.1394 | 0.5554 |
| SE0653 | SERP0545 | 2.330294 | 836.559  | 351.441  | 836.859  | 351.141  | 837.797  | 350.203  | 2   | 1   | 0.0024 | 0.0028 | 0.0024 | 0.0029 | 0.8276 | 0.4528 | -0.1487 | 0.5591 |
| SE0573 | SERP0460 | 2.330294 | 242.663  | 99.337   | 242.363  | 99.637   | 243.601  | 98.399   | 2   | 1   | 0.0082 | 0.0101 | 0.0083 | 0.0101 | 0.8218 | 0.4511 | -0.1545 | 0.5614 |
| SE1405 | SERP1292 | 2.330294 | 883.725  | 352.275  | 883.124  | 352.876  | 884.512  | 351.488  | 2   | 1   | 0.0023 | 0.0028 | 0.0023 | 0.0028 | 0.8214 | 0.4510 | -0.1550 | 0.5616 |
| SE2086 | SERP2100 | 2.330294 | 654.620  | 266.380  | 655.719  | 265.281  | 656.258  | 264.742  | 2   | 1   | 0.0031 | 0.0038 | 0.0031 | 0.0038 | 0.8158 | 0.4493 | -0.1594 | 0.5633 |
| SE0203 | SERP2373 | 2.330294 | 915.791  | 374.209  | 917.014  | 372.986  | 917.491  | 372.509  | 2   | 1   | 0.0022 | 0.0027 | 0.0022 | 0.0027 | 0.8148 | 0.4490 | -0.1619 | 0.5643 |
| SE0391 | SERP0275 | 2.330294 | 676.998  | 274.002  | 676.698  | 274.302  | 677.936  | 273.064  | 2   | 1   | 0.0030 | 0.0036 | 0.0030 | 0.0037 | 0.8108 | 0.4478 | -0.1645 | 0.5653 |
| SE1204 | SERP1084 | 2.330294 | 956.714  | 378.286  | 956.714  | 378.286  | 957.802  | 377.198  | 2   | 1   | 0.0021 | 0.0026 | 0.0021 | 0.0026 | 0.8077 | 0.4468 | -0.1666 | 0.5661 |
| SE0470 | SERP0357 | 2.330294 | 538.312  | 217.688  | 538.312  | 217.688  | 539.400  | 216.600  | 2   | 1   | 0.0037 | 0.0046 | 0.0037 | 0.0046 | 0.8043 | 0.4458 | -0.1703 | 0.5676 |
| SE1984 | SERP1996 | 2.330294 | 381.323  | 152.677  | 381.323  | 152.677  | 382.411  | 151.589  | 2   | 1   | 0.0052 | 0.0065 | 0.0053 | 0.0066 | 0.8030 | 0.4454 | -0.1718 | 0.5682 |
| SE1978 | SERP1990 | 2.330294 | 1714.292 | 688.708  | 1713.991 | 689.009  | 1715.230 | 687.770  | 2   | 1   | 0.0012 | 0.0015 | 0.0012 | 0.0015 | 0.8000 | 0.4444 | -0.1765 | 0.5700 |

|        |          |          |          |          |          |          |          |          |   |   |        |        |        |        |        |        |         |        |
|--------|----------|----------|----------|----------|----------|----------|----------|----------|---|---|--------|--------|--------|--------|--------|--------|---------|--------|
| SE0040 | SERP2494 | 2.330294 | 758.909  | 285.091  | 758.732  | 285.268  | 758.820  | 285.180  | 7 | 3 | 0.0092 | 0.0105 | 0.0093 | 0.0106 | 0.8774 | 0.4673 | -0.1782 | 0.5707 |
| SE1997 | SERP2009 | 2.330294 | 275.090  | 108.910  | 275.090  | 108.910  | 276.179  | 107.821  | 2 | 1 | 0.0073 | 0.0092 | 0.0073 | 0.0092 | 0.7935 | 0.4424 | -0.1783 | 0.5708 |
| SE0090 | SERP2526 | 2.330294 | 481.608  | 190.392  | 480.807  | 191.193  | 482.296  | 189.704  | 2 | 1 | 0.0042 | 0.0052 | 0.0042 | 0.0053 | 0.7925 | 0.4421 | -0.1821 | 0.5722 |
| SE1198 | SERP1078 | 2.330294 | 714.567  | 281.433  | 715.067  | 280.933  | 715.905  | 280.095  | 2 | 1 | 0.0028 | 0.0036 | 0.0028 | 0.0036 | 0.7778 | 0.4375 | -0.1943 | 0.5770 |
| SE1466 | SERP1360 | 2.330294 | 476.856  | 186.144  | 476.856  | 186.144  | 477.944  | 185.056  | 2 | 1 | 0.0042 | 0.0054 | 0.0042 | 0.0054 | 0.7778 | 0.4375 | -0.1943 | 0.5770 |
| SE2410 | SERP0011 | 2.330294 | 389.074  | 147.926  | 389.074  | 147.926  | 390.162  | 146.838  | 2 | 1 | 0.0051 | 0.0068 | 0.0052 | 0.0068 | 0.7647 | 0.4333 | -0.2080 | 0.5824 |
| SE0413 | SERP0298 | 2.330294 | 787.949  | 301.051  | 787.399  | 301.601  | 788.762  | 300.238  | 2 | 1 | 0.0025 | 0.0033 | 0.0025 | 0.0033 | 0.7576 | 0.4310 | -0.2128 | 0.5843 |
| SE1727 | SERP1736 | 2.330294 | 610.972  | 247.028  | 611.122  | 246.878  | 612.135  | 245.865  | 4 | 2 | 0.0065 | 0.0081 | 0.0066 | 0.0081 | 0.8148 | 0.4490 | -0.2248 | 0.5889 |
| SE0166 | SERP2405 | 2.330294 | 1097.445 | 438.555  | 1098.895 | 437.105  | 1099.258 | 436.742  | 8 | 4 | 0.0073 | 0.0091 | 0.0073 | 0.0092 | 0.7935 | 0.4424 | -0.3596 | 0.6404 |
| SE2254 | SERP2284 | 2.330294 | 561.086  | 236.914  | 561.086  | 236.914  | 562.174  | 235.826  | 3 | 2 | 0.0053 | 0.0084 | 0.0054 | 0.0085 | 0.6353 | 0.3885 | -0.4590 | 0.6769 |
| SE1051 | SERP0940 | 2.330294 | 554.396  | 231.604  | 555.646  | 230.354  | 556.109  | 229.891  | 3 | 2 | 0.0054 | 0.0087 | 0.0054 | 0.0087 | 0.6207 | 0.3830 | -0.4761 | 0.6830 |
| SE1037 | SERP0926 | 2.330294 | 1709.536 | 690.464  | 1709.713 | 690.287  | 1710.713 | 689.287  | 1 | 1 | 0.0006 | 0.0014 | 0.0006 | 0.0014 | 0.4286 | 0.3000 | -0.4952 | 0.6898 |
| SE2381 | SERP0035 | 2.330294 | 1294.941 | 541.059  | 1294.641 | 541.359  | 1295.879 | 540.121  | 1 | 1 | 0.0008 | 0.0018 | 0.0008 | 0.0018 | 0.4444 | 0.3077 | -0.5077 | 0.6942 |
| SE0750 | SERP0636 | 2.330294 | 2845.868 | 1159.132 | 2846.568 | 1158.432 | 2847.306 | 1157.694 | 1 | 1 | 0.0004 | 0.0009 | 0.0004 | 0.0009 | 0.4444 | 0.3077 | -0.5077 | 0.6942 |
| SE1804 | SERP1812 | 2.330294 | 303.794  | 134.206  | 304.494  | 133.506  | 305.232  | 132.768  | 1 | 1 | 0.0033 | 0.0075 | 0.0033 | 0.0075 | 0.4400 | 0.3056 | -0.5126 | 0.6959 |
| SE1194 | SERP1074 | 2.330294 | 688.756  | 286.244  | 688.456  | 286.544  | 689.694  | 285.306  | 1 | 1 | 0.0015 | 0.0035 | 0.0015 | 0.0035 | 0.4286 | 0.3000 | -0.5252 | 0.7003 |
| SE0151 | SERP2419 | 2.330294 | 132.232  | 50.768   | 133.333  | 49.667   | 132.783  | 50.217   | 3 | 2 | 0.0226 | 0.0398 | 0.0229 | 0.0409 | 0.5599 | 0.3589 | -0.5333 | 0.7031 |
| SE2172 | SERP2183 | 2.330294 | 1313.650 | 534.350  | 1313.350 | 534.650  | 1314.588 | 533.412  | 1 | 1 | 0.0008 | 0.0019 | 0.0008 | 0.0019 | 0.4211 | 0.2963 | -0.5336 | 0.7032 |
| SE0784 | SERP0672 | 2.330294 | 968.402  | 384.598  | 969.351  | 383.649  | 969.965  | 383.035  | 5 | 3 | 0.0052 | 0.0078 | 0.0052 | 0.0079 | 0.6582 | 0.3969 | -0.5343 | 0.7034 |
| SE1728 | SERP1737 | 2.330294 | 561.058  | 233.942  | 561.058  | 233.942  | 562.146  | 232.854  | 1 | 1 | 0.0018 | 0.0043 | 0.0018 | 0.0043 | 0.4186 | 0.2951 | -0.5363 | 0.7041 |
| SE2010 | SERP2023 | 2.330294 | 974.909  | 423.091  | 975.059  | 422.941  | 976.072  | 421.928  | 1 | 1 | 0.0010 | 0.0024 | 0.0010 | 0.0024 | 0.4167 | 0.2941 | -0.5385 | 0.7049 |
| SE2183 | SERP2194 | 2.330294 | 336.981  | 137.019  | 337.282  | 136.718  | 338.220  | 135.780  | 1 | 1 | 0.0030 | 0.0073 | 0.0030 | 0.0073 | 0.4110 | 0.2913 | -0.5385 | 0.7049 |
| SE1456 | SERP1350 | 2.330294 | 602.855  | 231.145  | 602.405  | 231.595  | 602.630  | 231.370  | 3 | 2 | 0.0050 | 0.0086 | 0.0050 | 0.0087 | 0.5747 | 0.3650 | -0.5406 | 0.7056 |
| SE0745 | SERP0631 | 2.330294 | 570.591  | 230.409  | 570.891  | 230.109  | 571.829  | 229.171  | 1 | 1 | 0.0018 | 0.0043 | 0.0018 | 0.0044 | 0.4091 | 0.2903 | -0.5469 | 0.7078 |
| SE1691 | SERP1699 | 2.330294 | 555.890  | 230.110  | 556.191  | 229.809  | 557.129  | 228.871  | 1 | 1 | 0.0018 | 0.0043 | 0.0018 | 0.0044 | 0.4091 | 0.2903 | -0.5469 | 0.7078 |
| SE0504 | SERP0387 | 2.330294 | 741.778  | 311.222  | 741.602  | 311.398  | 742.778  | 310.222  | 1 | 1 | 0.0013 | 0.0032 | 0.0013 | 0.0032 | 0.4063 | 0.2889 | -0.5501 | 0.7089 |
| SE1868 | SERP1876 | 2.330294 | 243.520  | 98.480   | 243.520  | 98.480   | 244.608  | 97.392   | 1 | 1 | 0.0041 | 0.0102 | 0.0041 | 0.0102 | 0.4020 | 0.2867 | -0.5502 | 0.7089 |
| SE1883 | SERP1893 | 2.330294 | 679.663  | 268.337  | 678.263  | 269.737  | 680.051  | 267.949  | 1 | 1 | 0.0015 | 0.0037 | 0.0015 | 0.0037 | 0.4054 | 0.2885 | -0.5510 | 0.7092 |
| SE0544 | SERP0429 | 2.330294 | 600.427  | 236.573  | 599.027  | 237.973  | 600.815  | 236.185  | 1 | 1 | 0.0017 | 0.0042 | 0.0017 | 0.0042 | 0.4048 | 0.2881 | -0.5518 | 0.7094 |
| SE1596 | SERP1449 | 2.330294 | 585.487  | 239.513  | 585.487  | 239.513  | 586.575  | 238.425  | 1 | 1 | 0.0017 | 0.0042 | 0.0017 | 0.0042 | 0.4048 | 0.2881 | -0.5518 | 0.7094 |
| SE0610 | SERP0500 | 2.330294 | 999.816  | 395.184  | 1000.117 | 394.883  | 1001.055 | 393.945  | 1 | 1 | 0.0010 | 0.0025 | 0.0010 | 0.0025 | 0.4000 | 0.2857 | -0.5571 | 0.7113 |
| SE1453 | SERP0544 | 2.330294 | 725.375  | 285.625  | 725.375  | 285.625  | 726.463  | 284.537  | 1 | 1 | 0.0014 | 0.0035 | 0.0014 | 0.0035 | 0.4000 | 0.2857 | -0.5571 | 0.7113 |
| SE1197 | SERP1077 | 2.330294 | 693.493  | 287.507  | 693.493  | 287.507  | 694.581  | 286.419  | 1 | 1 | 0.0014 | 0.0035 | 0.0014 | 0.0035 | 0.4000 | 0.2857 | -0.5571 | 0.7113 |
| SE1361 | SERP1250 | 2.330294 | 733.866  | 289.134  | 733.566  | 289.434  | 734.804  | 288.196  | 1 | 1 | 0.0014 | 0.0035 | 0.0014 | 0.0035 | 0.4000 | 0.2857 | -0.5571 | 0.7113 |
| SE1784 | SERP1792 | 2.330294 | 690.904  | 284.096  | 691.081  | 283.919  | 692.080  | 282.920  | 1 | 1 | 0.0014 | 0.0035 | 0.0014 | 0.0035 | 0.4000 | 0.2857 | -0.5571 | 0.7113 |
| SE1975 | SERP1987 | 2.330294 | 2653.185 | 1027.815 | 2653.185 | 1027.815 | 2654.274 | 1026.726 | 1 | 1 | 0.0004 | 0.0010 | 0.0004 | 0.0010 | 0.4000 | 0.2857 | -0.5571 | 0.7113 |
| SE2244 | SERP2276 | 2.330294 | 1711.663 | 676.337  | 1711.963 | 676.037  | 1712.901 | 675.099  | 1 | 1 | 0.0006 | 0.0015 | 0.0006 | 0.0015 | 0.4000 | 0.2857 | -0.5571 | 0.7113 |
| SE0647 | SERP0539 | 2.330294 | 269.245  | 108.755  | 269.245  | 108.755  | 270.333  | 107.667  | 1 | 1 | 0.0037 | 0.0092 | 0.0037 | 0.0093 | 0.3978 | 0.2846 | -0.5595 | 0.7121 |
| SE1711 | SERP1720 | 2.330294 | 374.648  | 147.352  | 374.798  | 147.202  | 375.811  | 146.189  | 1 | 1 | 0.0027 | 0.0068 | 0.0027 | 0.0068 | 0.3971 | 0.2842 | -0.5604 | 0.7124 |

|        |          |          |          |         |          |         |          |         |      |     |        |        |        |        |        |        |         |        |
|--------|----------|----------|----------|---------|----------|---------|----------|---------|------|-----|--------|--------|--------|--------|--------|--------|---------|--------|
| SE0602 | SERP0491 | 2.330294 | 574.474  | 235.526 | 574.474  | 235.526 | 575.562  | 234.438 | 1    | 1   | 0.0017 | 0.0042 | 0.0017 | 0.0043 | 0.3953 | 0.2833 | -0.5623 | 0.7130 |
| SE0746 | SERP0632 | 2.330294 | 580.210  | 235.790 | 580.910  | 235.090 | 581.648  | 234.352 | 1    | 1   | 0.0017 | 0.0042 | 0.0017 | 0.0043 | 0.3953 | 0.2833 | -0.5623 | 0.7130 |
| SE0209 | SERP2369 | 2.330294 | 580.342  | 232.658 | 579.642  | 233.358 | 581.080  | 231.920 | 1    | 1   | 0.0017 | 0.0043 | 0.0017 | 0.0043 | 0.3953 | 0.2833 | -0.5623 | 0.7130 |
| SE0414 | SERP0299 | 2.330294 | 762.345  | 299.655 | 762.646  | 299.354 | 763.584  | 298.416 | 1    | 1   | 0.0013 | 0.0033 | 0.0013 | 0.0033 | 0.3939 | 0.2826 | -0.5639 | 0.7136 |
| SE1010 | SERP0898 | 2.330294 | 756.820  | 305.180 | 756.121  | 305.879 | 757.559  | 304.441 | 1    | 1   | 0.0013 | 0.0033 | 0.0013 | 0.0033 | 0.3939 | 0.2826 | -0.5639 | 0.7136 |
| SE2098 | SERP2112 | 2.330294 | 742.308  | 307.692 | 743.707  | 306.293 | 744.095  | 305.905 | 1    | 1   | 0.0013 | 0.0033 | 0.0013 | 0.0033 | 0.3939 | 0.2826 | -0.5639 | 0.7136 |
| SE2347 | SERP0070 | 2.330294 | 1100.299 | 438.701 | 1099.749 | 439.251 | 1101.112 | 437.888 | 1    | 1   | 0.0009 | 0.0023 | 0.0009 | 0.0023 | 0.3913 | 0.2813 | -0.5668 | 0.7146 |
| SE1014 | SERP0901 | 2.330294 | 224.338  | 87.662  | 224.639  | 87.361  | 225.577  | 86.423  | 1    | 1   | 0.0045 | 0.0114 | 0.0045 | 0.0115 | 0.3913 | 0.2813 | -0.5668 | 0.7146 |
| SE1220 | SERP1100 | 2.330294 | 1073.890 | 432.110 | 1073.890 | 432.110 | 1074.979 | 431.021 | 1    | 1   | 0.0009 | 0.0023 | 0.0009 | 0.0023 | 0.3913 | 0.2813 | -0.5668 | 0.7146 |
| SE1679 | SERP1688 | 2.330294 | 1094.357 | 432.643 | 1094.357 | 432.643 | 1095.445 | 431.555 | 1    | 1   | 0.0009 | 0.0023 | 0.0009 | 0.0023 | 0.3913 | 0.2813 | -0.5668 | 0.7146 |
| SE2198 | SERP2209 | 2.330294 | 1101.113 | 440.887 | 1101.413 | 440.587 | 1102.351 | 439.649 | 1    | 1   | 0.0009 | 0.0023 | 0.0009 | 0.0023 | 0.3913 | 0.2813 | -0.5668 | 0.7146 |
| SE2219 | SERP2252 | 2.330294 | 1087.242 | 433.758 | 1087.242 | 433.758 | 1088.330 | 432.670 | 1    | 1   | 0.0009 | 0.0023 | 0.0009 | 0.0023 | 0.3913 | 0.2813 | -0.5668 | 0.7146 |
| SE1612 | SERP1465 | 2.330294 | 1464.447 | 560.553 | 1463.897 | 561.103 | 1465.260 | 559.740 | 1    | 1   | 0.0007 | 0.0018 | 0.0007 | 0.0018 | 0.3889 | 0.2800 | -0.5696 | 0.7155 |
| SE0156 | SERP2413 | 2.330294 | 696.045  | 281.955 | 696.045  | 281.955 | 697.133  | 280.867 | 1    | 1   | 0.0014 | 0.0035 | 0.0014 | 0.0036 | 0.3889 | 0.2800 | -0.5696 | 0.7155 |
| SE0505 | SERP0388 | 2.330294 | 390.423  | 146.577 | 390.122  | 146.878 | 391.361  | 145.639 | 1    | 1   | 0.0026 | 0.0068 | 0.0026 | 0.0068 | 0.3824 | 0.2766 | -0.5696 | 0.7155 |
| SE0825 | SERP0716 | 2.330294 | 807.532  | 323.468 | 807.532  | 323.468 | 808.621  | 322.379 | 1    | 1   | 0.0012 | 0.0031 | 0.0012 | 0.0031 | 0.3871 | 0.2791 | -0.5716 | 0.7162 |
| SE1985 | SERP1997 | 2.330294 | 589.743  | 229.257 | 589.743  | 229.257 | 590.831  | 228.169 | 1    | 1   | 0.0017 | 0.0044 | 0.0017 | 0.0044 | 0.3864 | 0.2787 | -0.5724 | 0.7165 |
| SE0110 | SERP2220 | 2.330294 | 308.369  | 120.631 | 308.369  | 120.631 | 309.457  | 119.543 | 1    | 1   | 0.0032 | 0.0083 | 0.0032 | 0.0083 | 0.3855 | 0.2783 | -0.5733 | 0.7168 |
| SE2299 | SERP0122 | 2.330294 | 666.800  | 257.200 | 666.800  | 257.200 | 667.888  | 256.112 | 1    | 1   | 0.0015 | 0.0039 | 0.0015 | 0.0039 | 0.3846 | 0.2778 | -0.5744 | 0.7171 |
| SE1372 | SERP1260 | 2.330294 | 965.851  | 390.149 | 965.851  | 390.149 | 966.939  | 389.061 | 1    | 1   | 0.0010 | 0.0026 | 0.0010 | 0.0026 | 0.3846 | 0.2778 | -0.5744 | 0.7171 |
| SE1660 | SERP1671 | 2.330294 | 980.835  | 387.165 | 980.835  | 387.165 | 981.924  | 386.076 | 1    | 1   | 0.0010 | 0.0026 | 0.0010 | 0.0026 | 0.3846 | 0.2778 | -0.5744 | 0.7171 |
| SE0251 | SERP2330 | 2.330294 | 649.922  | 259.078 | 649.222  | 259.778 | 650.661  | 258.339 | 1    | 1   | 0.0015 | 0.0039 | 0.0015 | 0.0039 | 0.3846 | 0.2778 | -0.5744 | 0.7171 |
| SE1949 | SERP1961 | 2.330294 | 388.694  | 148.306 | 388.571  | 148.429 | 389.721  | 147.279 | 1    | 1   | 0.0026 | 0.0067 | 0.0026 | 0.0068 | 0.3824 | 0.2766 | -0.5769 | 0.7180 |
| SE2091 | SERP2105 | 2.330294 | 772.900  | 298.100 | 772.577  | 298.423 | 773.827  | 297.173 | 1    | 1   | 0.0013 | 0.0034 | 0.0013 | 0.0034 | 0.3824 | 0.2766 | -0.5769 | 0.7180 |
| SE0786 | SERP0674 | 2.330294 | 473.548  | 183.452 | 473.548  | 183.452 | 474.636  | 182.364 | 1    | 1   | 0.0021 | 0.0055 | 0.0021 | 0.0055 | 0.3818 | 0.2763 | -0.5775 | 0.7182 |
| SE1196 | SERP1076 | 2.330294 | 950.617  | 366.383 | 950.740  | 366.260 | 951.767  | 365.233 | 7    | 4   | 0.0074 | 0.0109 | 0.0074 | 0.0110 | 0.6727 | 0.4022 | -0.5833 | 0.7202 |
| SE1188 | SERP1067 | 2.330294 | 1065.695 | 416.305 | 1065.695 | 416.305 | 1066.784 | 415.216 | 1    | 1   | 0.0009 | 0.0024 | 0.0009 | 0.0024 | 0.3750 | 0.2727 | -0.5852 | 0.7208 |
| SE1552 | SERP1406 | 2.330294 | 755.650  | 285.350 | 755.650  | 285.350 | 756.739  | 284.261 | 1    | 1   | 0.0013 | 0.0035 | 0.0013 | 0.0035 | 0.3714 | 0.2708 | -0.5892 | 0.7221 |
| SE0574 | SERP0461 | 2.330294 | 302.675  | 111.325 | 302.675  | 111.325 | 303.763  | 110.237 | 1    | 1   | 0.0033 | 0.0090 | 0.0033 | 0.0090 | 0.3667 | 0.2683 | -0.5946 | 0.7240 |
| SE1432 | SERP1319 | 2.330294 | 875.903  | 336.097 | 875.603  | 336.397 | 876.841  | 335.159 | 1    | 1   | 0.0011 | 0.0030 | 0.0011 | 0.0030 | 0.3667 | 0.2683 | -0.5946 | 0.7240 |
| SE2201 | SERP2212 | 2.330294 | 946.144  | 388.856 | 948.044  | 386.956 | 947.094  | 387.906 | 15.5 | 8.5 | 0.0164 | 0.0219 | 0.0165 | 0.0222 | 0.7432 | 0.4264 | -0.6528 | 0.7430 |
| SE0181 | SERP2394 | 2.330294 | 805.211  | 325.789 | 805.785  | 325.215 | 805.498  | 325.502 | 15.5 | 8.5 | 0.0192 | 0.0261 | 0.0195 | 0.0266 | 0.7331 | 0.4230 | -0.6798 | 0.7517 |
| SE2239 | SERP2271 | 2.330294 | 243.947  | 110.053 | 243.947  | 110.053 | 245.035  | 108.965 | 2    | 2   | 0.0082 | 0.0182 | 0.0082 | 0.0184 | 0.4457 | 0.3083 | -0.7120 | 0.7618 |
| SE1464 | SERP1358 | 2.330294 | 1013.025 | 408.975 | 1014.025 | 407.975 | 1014.613 | 407.387 | 6    | 4   | 0.0059 | 0.0098 | 0.0059 | 0.0099 | 0.5960 | 0.3734 | -0.7331 | 0.7683 |
| SE1459 | SERP1353 | 2.330294 | 1137.876 | 452.124 | 1140.126 | 449.874 | 1140.089 | 449.911 | 4    | 3   | 0.0035 | 0.0067 | 0.0035 | 0.0067 | 0.5224 | 0.3431 | -0.7450 | 0.7719 |
| SE0003 | SERP2550 | 2.330294 | 785.684  | 327.316 | 786.484  | 326.516 | 787.172  | 325.828 | 2    | 2   | 0.0025 | 0.0061 | 0.0025 | 0.0061 | 0.4098 | 0.2907 | -0.7573 | 0.7756 |
| SE1628 | SERP1483 | 2.330294 | 772.850  | 298.150 | 773.099  | 297.901 | 774.063  | 296.937 | 6    | 4   | 0.0078 | 0.0134 | 0.0078 | 0.0135 | 0.5778 | 0.3662 | -0.7585 | 0.7759 |
| SE1437 | SERP1324 | 2.330294 | 720.889  | 278.111 | 720.340  | 278.660 | 721.703  | 277.297 | 4    | 3   | 0.0056 | 0.0108 | 0.0056 | 0.0109 | 0.5138 | 0.3394 | -0.7688 | 0.7790 |
| SE2152 | SERP2162 | 2.330294 | 415.503  | 172.497 | 414.703  | 173.297 | 415.103  | 172.897 | 2    | 2   | 0.0048 | 0.0116 | 0.0048 | 0.0117 | 0.4103 | 0.2909 | -0.7693 | 0.7791 |



|        |          |          |          |         |          |         |          |         |   |   |        |        |        |        |        |        |         |        |
|--------|----------|----------|----------|---------|----------|---------|----------|---------|---|---|--------|--------|--------|--------|--------|--------|---------|--------|
| SE1589 | SERP1442 | 2.330294 | 1418.042 | 576.958 | 1418.418 | 576.582 | 1419.318 | 575.682 | 2 | 2 | 0.0014 | 0.0035 | 0.0014 | 0.0035 | 0.4000 | 0.2857 | -0.7799 | 0.7823 |
| SE0616 | SERP0510 | 2.330294 | 939.635  | 377.365 | 939.935  | 377.065 | 940.873  | 376.127 | 2 | 2 | 0.0021 | 0.0053 | 0.0021 | 0.0053 | 0.3962 | 0.2838 | -0.7833 | 0.7833 |
| SE0226 | SERP2354 | 2.330294 | 546.508  | 218.492 | 546.808  | 218.192 | 547.746  | 217.254 | 2 | 2 | 0.0037 | 0.0092 | 0.0037 | 0.0092 | 0.4022 | 0.2868 | -0.7856 | 0.7840 |
| SE1427 | SERP1313 | 2.330294 | 1175.731 | 483.269 | 1176.181 | 482.819 | 1177.044 | 481.956 | 2 | 2 | 0.0017 | 0.0041 | 0.0017 | 0.0042 | 0.4048 | 0.2881 | -0.7966 | 0.7871 |
| SE2087 | SERP2101 | 2.330294 | 287.898  | 114.102 | 287.022  | 114.978 | 288.548  | 113.452 | 2 | 2 | 0.0070 | 0.0175 | 0.0070 | 0.0177 | 0.3955 | 0.2834 | -0.7970 | 0.7873 |
| SE1434 | SERP1321 | 2.330294 | 403.434  | 157.566 | 403.611  | 157.389 | 404.611  | 156.389 | 2 | 2 | 0.0050 | 0.0127 | 0.0050 | 0.0128 | 0.3906 | 0.2809 | -0.8000 | 0.7881 |
| SE1439 | SERP1326 | 2.330294 | 851.801  | 327.199 | 851.978  | 327.022 | 852.978  | 326.022 | 2 | 2 | 0.0023 | 0.0061 | 0.0024 | 0.0061 | 0.3934 | 0.2824 | -0.8002 | 0.7882 |
| SE2373 | SERP0043 | 2.330294 | 580.209  | 226.791 | 580.209  | 226.791 | 581.298  | 225.702 | 2 | 2 | 0.0034 | 0.0088 | 0.0035 | 0.0089 | 0.3933 | 0.2823 | -0.8010 | 0.7884 |
| SE0679 | SERP0569 | 2.330294 | 265.990  | 103.010 | 265.690  | 103.310 | 266.928  | 102.072 | 2 | 2 | 0.0075 | 0.0194 | 0.0076 | 0.0196 | 0.3878 | 0.2794 | -0.8016 | 0.7886 |
| SE1461 | SERP1355 | 2.330294 | 340.749  | 133.251 | 340.625  | 133.375 | 341.775  | 132.225 | 2 | 2 | 0.0059 | 0.0150 | 0.0059 | 0.0152 | 0.3882 | 0.2796 | -0.8091 | 0.7908 |
| SE0921 | SERP0811 | 2.330294 | 622.310  | 238.690 | 622.460  | 238.540 | 623.473  | 237.527 | 2 | 2 | 0.0032 | 0.0084 | 0.0032 | 0.0084 | 0.3810 | 0.2759 | -0.8092 | 0.7908 |
| SE1987 | SERP1999 | 2.330294 | 431.713  | 162.287 | 431.112  | 162.888 | 432.501  | 161.499 | 2 | 2 | 0.0046 | 0.0123 | 0.0047 | 0.0124 | 0.3790 | 0.2749 | -0.8193 | 0.7937 |
| SE0154 | SERP2414 | 2.330294 | 260.569  | 96.431  | 260.268  | 96.732  | 261.507  | 95.493  | 2 | 2 | 0.0077 | 0.0207 | 0.0077 | 0.0210 | 0.3667 | 0.2683 | -0.8392 | 0.7993 |
| SE1938 | SERP1950 | 2.330294 | 679.493  | 274.507 | 679.943  | 274.057 | 680.806  | 273.194 | 5 | 4 | 0.0074 | 0.0146 | 0.0074 | 0.0147 | 0.5034 | 0.3348 | -0.9010 | 0.8162 |
| SE2177 | SERP2188 | 2.330294 | 431.631  | 177.369 | 430.932  | 178.068 | 432.370  | 176.630 | 3 | 3 | 0.0070 | 0.0169 | 0.0070 | 0.0171 | 0.4094 | 0.2905 | -0.9459 | 0.8279 |
| SE1550 | SERP1403 | 2.330294 | 1227.671 | 506.329 | 1227.097 | 506.903 | 1228.472 | 505.528 | 3 | 3 | 0.0024 | 0.0059 | 0.0024 | 0.0059 | 0.4068 | 0.2892 | -0.9519 | 0.8294 |
| SE0818 | SERP0709 | 2.330294 | 307.775  | 124.225 | 308.625  | 123.375 | 309.288  | 122.712 | 3 | 3 | 0.0097 | 0.0242 | 0.0098 | 0.0246 | 0.3984 | 0.2849 | -0.9579 | 0.8309 |
| SE1274 | SERP1155 | 2.330294 | 1575.316 | 638.684 | 1577.715 | 636.285 | 1577.604 | 636.396 | 3 | 3 | 0.0019 | 0.0047 | 0.0019 | 0.0047 | 0.4043 | 0.2879 | -0.9604 | 0.8316 |
| SE1345 | SERP1234 | 2.330294 | 656.573  | 267.427 | 656.573  | 267.427 | 657.661  | 266.339 | 0 | 1 | 0.0000 | 0.0037 | 0.0000 | 0.0037 | 0.0000 | 0.0000 | -0.9737 | 0.8349 |
| SE0715 | SERP0604 | 2.330294 | 363.151  | 143.849 | 363.701  | 143.299 | 364.514  | 142.486 | 3 | 3 | 0.0083 | 0.0209 | 0.0083 | 0.0212 | 0.3915 | 0.2814 | -0.9770 | 0.8357 |
| SE0205 | SERP2372 | 2.330294 | 1140.231 | 455.769 | 1140.231 | 455.769 | 1141.319 | 454.681 | 3 | 3 | 0.0026 | 0.0066 | 0.0026 | 0.0066 | 0.3939 | 0.2826 | -0.9791 | 0.8362 |
| SE0620 | SERP0514 | 2.330294 | 310.422  | 121.578 | 309.422  | 122.578 | 309.922  | 122.078 | 3 | 3 | 0.0097 | 0.0246 | 0.0097 | 0.0250 | 0.3880 | 0.2795 | -0.9843 | 0.8375 |
| SE2092 | SERP2106 | 2.330294 | 316.821  | 133.179 | 316.821  | 133.179 | 317.909  | 132.091 | 0 | 1 | 0.0000 | 0.0075 | 0.0000 | 0.0075 | 0.0000 | 0.0000 | -0.9868 | 0.8381 |
| SE1790 | SERP1798 | 2.330294 | 269.442  | 120.558 | 269.442  | 120.558 | 270.530  | 119.470 | 0 | 1 | 0.0000 | 0.0083 | 0.0000 | 0.0083 | 0.0000 | 0.0000 | -0.9881 | 0.8384 |
| SE2418 | SERP0002 | 2.330294 | 250.182  | 94.818  | 250.182  | 94.818  | 251.270  | 93.730  | 0 | 1 | 0.0000 | 0.0105 | 0.0000 | 0.0106 | 0.0000 | 0.0000 | -0.9907 | 0.8391 |
| SE1812 | SERP1820 | 2.330294 | 224.815  | 90.185  | 225.365  | 89.635  | 226.178  | 88.822  | 0 | 1 | 0.0000 | 0.0111 | 0.0000 | 0.0112 | 0.0000 | 0.0000 | -0.9912 | 0.8392 |
| SE1450 | SERP1337 | 2.330294 | 221.188  | 84.812  | 220.639  | 85.361  | 222.002  | 83.998  | 0 | 1 | 0.0000 | 0.0118 | 0.0000 | 0.0118 | 0.0000 | 0.0000 | -0.9916 | 0.8393 |
| SE1882 | SERP1892 | 2.330294 | 193.212  | 79.788  | 193.212  | 79.788  | 194.300  | 78.700  | 0 | 1 | 0.0000 | 0.0125 | 0.0000 | 0.0126 | 0.0000 | 0.0000 | -0.9921 | 0.8394 |
| SE0626 | SERP0520 | 2.330294 | 167.563  | 66.437  | 167.563  | 66.437  | 168.651  | 65.349  | 0 | 1 | 0.0000 | 0.0151 | 0.0000 | 0.0152 | 0.0000 | 0.0000 | -0.9935 | 0.8398 |
| SE1775 | SERP1783 | 2.330294 | 171.263  | 65.737  | 171.263  | 65.737  | 172.351  | 64.649  | 0 | 1 | 0.0000 | 0.0152 | 0.0000 | 0.0154 | 0.0000 | 0.0000 | -0.9935 | 0.8398 |
| SE1024 | SERP0911 | 2.330294 | 171.734  | 62.266  | 171.734  | 62.266  | 172.822  | 61.178  | 0 | 1 | 0.0000 | 0.0161 | 0.0000 | 0.0162 | 0.0000 | 0.0000 | -0.9939 | 0.8399 |
| SE0230 | SERP2350 | 2.330294 | 160.338  | 61.662  | 160.338  | 61.662  | 161.427  | 60.573  | 0 | 1 | 0.0000 | 0.0162 | 0.0000 | 0.0164 | 0.0000 | 0.0000 | -0.9939 | 0.8399 |
| SE0783 | SERP0671 | 2.330294 | 172.866  | 61.134  | 172.866  | 61.134  | 173.954  | 60.046  | 0 | 1 | 0.0000 | 0.0164 | 0.0000 | 0.0165 | 0.0000 | 0.0000 | -0.9940 | 0.8399 |
| SE1742 | SERP1751 | 2.330294 | 164.580  | 60.420  | 164.580  | 60.420  | 165.668  | 59.332  | 0 | 1 | 0.0000 | 0.0166 | 0.0000 | 0.0167 | 0.0000 | 0.0000 | -0.9940 | 0.8399 |
| SE1003 | SERP0890 | 2.330294 | 131.258  | 54.742  | 131.258  | 54.742  | 132.346  | 53.654  | 0 | 1 | 0.0000 | 0.0183 | 0.0000 | 0.0185 | 0.0000 | 0.0000 | -0.9946 | 0.8400 |
| SE0297 | SERP0175 | 2.330294 | 99.710   | 41.290  | 99.710   | 41.290  | 100.798  | 40.202  | 0 | 1 | 0.0000 | 0.0242 | 0.0000 | 0.0246 | 0.0000 | 0.0000 | -0.9960 | 0.8404 |
| SE2359 | SERP0058 | 2.330294 | 97.054   | 28.946  | 97.054   | 28.946  | 98.142   | 27.858  | 0 | 1 | 0.0000 | 0.0345 | 0.0000 | 0.0354 | 0.0000 | 0.0000 | -0.9972 | 0.8407 |
| SE2411 | SERP0010 | 2.330294 | 284.290  | 108.710 | 284.290  | 108.710 | 285.378  | 107.622 | 0 | 1 | 0.0000 | 0.0092 | 0.0000 | 0.0093 | 0.0000 | 0.0000 | -1.0000 | 0.8413 |
| SE2406 | SERP0015 | 2.330294 | 487.736  | 196.264 | 488.436  | 195.564 | 489.174  | 194.826 | 0 | 1 | 0.0000 | 0.0051 | 0.0000 | 0.0051 | 0.0000 | 0.0000 | -1.0000 | 0.8413 |

|        |          |          |          |          |          |          |          |          |   |   |        |        |        |        |        |        |         |        |
|--------|----------|----------|----------|----------|----------|----------|----------|----------|---|---|--------|--------|--------|--------|--------|--------|---------|--------|
| SE2405 | SERP0016 | 2.330294 | 855.377  | 338.623  | 855.377  | 338.623  | 856.466  | 337.534  | 0 | 1 | 0.0000 | 0.0030 | 0.0000 | 0.0030 | 0.0000 | 0.0000 | -1.0000 | 0.8413 |
| SE2401 | SERP0020 | 2.330294 | 1351.233 | 526.767  | 1351.233 | 526.767  | 1352.321 | 525.679  | 0 | 1 | 0.0000 | 0.0019 | 0.0000 | 0.0019 | 0.0000 | 0.0000 | -1.0000 | 0.8413 |
| SE2371 | SERP0045 | 2.330294 | 358.424  | 148.576  | 358.924  | 148.076  | 359.762  | 147.238  | 0 | 1 | 0.0000 | 0.0067 | 0.0000 | 0.0068 | 0.0000 | 0.0000 | -1.0000 | 0.8413 |
| SE2349 | SERP0068 | 2.330294 | 889.951  | 376.049  | 889.951  | 376.049  | 891.040  | 374.960  | 0 | 1 | 0.0000 | 0.0027 | 0.0000 | 0.0027 | 0.0000 | 0.0000 | -1.0000 | 0.8413 |
| SE2341 | SERP0074 | 2.330294 | 446.982  | 168.018  | 446.982  | 168.018  | 448.070  | 166.930  | 0 | 1 | 0.0000 | 0.0060 | 0.0000 | 0.0060 | 0.0000 | 0.0000 | -1.0000 | 0.8413 |
| SE2323 | SERP0095 | 2.330294 | 805.470  | 337.530  | 805.470  | 337.530  | 806.559  | 336.441  | 0 | 1 | 0.0000 | 0.0030 | 0.0000 | 0.0030 | 0.0000 | 0.0000 | -1.0000 | 0.8413 |
| SE2322 | SERP0097 | 2.330294 | 733.079  | 289.921  | 733.379  | 289.621  | 734.318  | 288.682  | 0 | 1 | 0.0000 | 0.0035 | 0.0000 | 0.0035 | 0.0000 | 0.0000 | -1.0000 | 0.8413 |
| SE2306 | SERP0115 | 2.330294 | 232.266  | 82.734   | 232.266  | 82.734   | 233.354  | 81.646   | 0 | 1 | 0.0000 | 0.0121 | 0.0000 | 0.0122 | 0.0000 | 0.0000 | -1.0000 | 0.8413 |
| SE2298 | SERP0123 | 2.330294 | 568.549  | 232.451  | 568.549  | 232.451  | 569.638  | 231.362  | 0 | 1 | 0.0000 | 0.0043 | 0.0000 | 0.0043 | 0.0000 | 0.0000 | -1.0000 | 0.8413 |
| SE2271 | SERP0151 | 2.330294 | 626.538  | 252.462  | 626.538  | 252.462  | 627.627  | 251.373  | 0 | 1 | 0.0000 | 0.0040 | 0.0000 | 0.0040 | 0.0000 | 0.0000 | -1.0000 | 0.8413 |
| SE0307 | SERP0184 | 2.330294 | 2565.305 | 1055.695 | 2565.305 | 1055.695 | 2566.394 | 1054.606 | 0 | 1 | 0.0000 | 0.0009 | 0.0000 | 0.0009 | 0.0000 | 0.0000 | -1.0000 | 0.8413 |
| SE0421 | SERP0306 | 2.330294 | 561.167  | 233.833  | 561.167  | 233.833  | 562.255  | 232.745  | 0 | 1 | 0.0000 | 0.0043 | 0.0000 | 0.0043 | 0.0000 | 0.0000 | -1.0000 | 0.8413 |
| SE0503 | SERP0386 | 2.330294 | 1073.556 | 438.444  | 1073.556 | 438.444  | 1074.644 | 437.356  | 0 | 1 | 0.0000 | 0.0023 | 0.0000 | 0.0023 | 0.0000 | 0.0000 | -1.0000 | 0.8413 |
| SE0515 | SERP0400 | 2.330294 | 679.743  | 292.257  | 679.443  | 292.557  | 680.681  | 291.319  | 0 | 1 | 0.0000 | 0.0034 | 0.0000 | 0.0034 | 0.0000 | 0.0000 | -1.0000 | 0.8413 |
| SE0525 | SERP0410 | 2.330294 | 880.985  | 355.015  | 880.985  | 355.015  | 882.074  | 353.926  | 0 | 1 | 0.0000 | 0.0028 | 0.0000 | 0.0028 | 0.0000 | 0.0000 | -1.0000 | 0.8413 |
| SE0550 | SERP0435 | 2.330294 | 676.890  | 265.110  | 676.890  | 265.110  | 677.978  | 264.022  | 0 | 1 | 0.0000 | 0.0038 | 0.0000 | 0.0038 | 0.0000 | 0.0000 | -1.0000 | 0.8413 |
| SE0564 | SERP0449 | 2.330294 | 529.610  | 208.390  | 529.610  | 208.390  | 530.698  | 207.302  | 0 | 1 | 0.0000 | 0.0048 | 0.0000 | 0.0048 | 0.0000 | 0.0000 | -1.0000 | 0.8413 |
| SE0571 | SERP0458 | 2.330294 | 919.581  | 385.419  | 919.581  | 385.419  | 920.669  | 384.331  | 0 | 1 | 0.0000 | 0.0026 | 0.0000 | 0.0026 | 0.0000 | 0.0000 | -1.0000 | 0.8413 |
| SE0598 | SERP0487 | 2.330294 | 279.770  | 104.230  | 279.770  | 104.230  | 280.858  | 103.142  | 0 | 1 | 0.0000 | 0.0096 | 0.0000 | 0.0097 | 0.0000 | 0.0000 | -1.0000 | 0.8413 |
| SE0646 | SERP0538 | 2.330294 | 1686.313 | 716.687  | 1686.313 | 716.687  | 1687.401 | 715.599  | 0 | 1 | 0.0000 | 0.0014 | 0.0000 | 0.0014 | 0.0000 | 0.0000 | -1.0000 | 0.8413 |
| SE0657 | SERP0549 | 2.330294 | 852.458  | 350.542  | 852.458  | 350.542  | 853.546  | 349.454  | 0 | 1 | 0.0000 | 0.0029 | 0.0000 | 0.0029 | 0.0000 | 0.0000 | -1.0000 | 0.8413 |
| SE0673 | SERP0563 | 2.330294 | 1292.278 | 528.722  | 1291.579 | 529.421  | 1293.017 | 527.983  | 0 | 1 | 0.0000 | 0.0019 | 0.0000 | 0.0019 | 0.0000 | 0.0000 | -1.0000 | 0.8413 |
| SE0677 | SERP0567 | 2.330294 | 677.177  | 261.823  | 677.177  | 261.823  | 678.266  | 260.734  | 0 | 1 | 0.0000 | 0.0038 | 0.0000 | 0.0038 | 0.0000 | 0.0000 | -1.0000 | 0.8413 |
| SE0712 | SERP0601 | 2.330294 | 539.112  | 228.888  | 539.112  | 228.888  | 540.201  | 227.799  | 0 | 1 | 0.0000 | 0.0044 | 0.0000 | 0.0044 | 0.0000 | 0.0000 | -1.0000 | 0.8413 |
| SE0714 | SERP0603 | 2.330294 | 540.038  | 212.962  | 540.038  | 212.962  | 541.126  | 211.874  | 0 | 1 | 0.0000 | 0.0047 | 0.0000 | 0.0047 | 0.0000 | 0.0000 | -1.0000 | 0.8413 |
| SE0728 | SERP0616 | 2.330294 | 718.670  | 265.330  | 718.670  | 265.330  | 719.758  | 264.242  | 0 | 1 | 0.0000 | 0.0038 | 0.0000 | 0.0038 | 0.0000 | 0.0000 | -1.0000 | 0.8413 |
| SE0774 | SERP0661 | 2.330294 | 994.552  | 406.448  | 994.552  | 406.448  | 995.640  | 405.360  | 0 | 1 | 0.0000 | 0.0025 | 0.0000 | 0.0025 | 0.0000 | 0.0000 | -1.0000 | 0.8413 |
| SE0789 | SERP0678 | 2.330294 | 392.800  | 156.200  | 392.800  | 156.200  | 393.888  | 155.112  | 0 | 1 | 0.0000 | 0.0064 | 0.0000 | 0.0064 | 0.0000 | 0.0000 | -1.0000 | 0.8413 |
| SE0791 | SERP0680 | 2.330294 | 789.493  | 320.507  | 789.493  | 320.507  | 790.582  | 319.418  | 0 | 1 | 0.0000 | 0.0031 | 0.0000 | 0.0031 | 0.0000 | 0.0000 | -1.0000 | 0.8413 |
| SE0899 | SERP0790 | 2.330294 | 132.904  | 53.096   | 132.904  | 53.096   | 133.992  | 52.008   | 0 | 1 | 0.0000 | 0.0188 | 0.0000 | 0.0191 | 0.0000 | 0.0000 | -1.0000 | 0.8413 |
| SE0913 | SERP0804 | 2.330294 | 192.012  | 80.988   | 192.012  | 80.988   | 193.100  | 79.900   | 0 | 1 | 0.0000 | 0.0123 | 0.0000 | 0.0125 | 0.0000 | 0.0000 | -1.0000 | 0.8413 |
| SE0923 | SERP0813 | 2.330294 | 819.010  | 344.990  | 819.010  | 344.990  | 820.098  | 343.902  | 0 | 1 | 0.0000 | 0.0029 | 0.0000 | 0.0029 | 0.0000 | 0.0000 | -1.0000 | 0.8413 |
| SE1016 | SERP0903 | 2.330294 | 1088.590 | 423.410  | 1088.590 | 423.410  | 1089.678 | 422.322  | 0 | 1 | 0.0000 | 0.0024 | 0.0000 | 0.0024 | 0.0000 | 0.0000 | -1.0000 | 0.8413 |
| SE1036 | SERP0925 | 2.330294 | 1421.639 | 576.361  | 1421.639 | 576.361  | 1422.727 | 575.273  | 0 | 1 | 0.0000 | 0.0017 | 0.0000 | 0.0017 | 0.0000 | 0.0000 | -1.0000 | 0.8413 |
| SE1046 | SERP0935 | 2.330294 | 900.131  | 359.869  | 900.131  | 359.869  | 901.220  | 358.780  | 0 | 1 | 0.0000 | 0.0028 | 0.0000 | 0.0028 | 0.0000 | 0.0000 | -1.0000 | 0.8413 |
| SE1049 | SERP0938 | 2.330294 | 402.983  | 161.017  | 402.983  | 161.017  | 404.072  | 159.928  | 0 | 1 | 0.0000 | 0.0062 | 0.0000 | 0.0062 | 0.0000 | 0.0000 | -1.0000 | 0.8413 |
| SE1052 | SERP0941 | 2.330294 | 453.002  | 167.998  | 453.551  | 167.449  | 454.364  | 166.636  | 0 | 1 | 0.0000 | 0.0060 | 0.0000 | 0.0060 | 0.0000 | 0.0000 | -1.0000 | 0.8413 |
| SE1054 | SERP0943 | 2.330294 | 523.932  | 205.068  | 523.932  | 205.068  | 525.020  | 203.980  | 0 | 1 | 0.0000 | 0.0049 | 0.0000 | 0.0049 | 0.0000 | 0.0000 | -1.0000 | 0.8413 |
| SE1123 | SERP1006 | 2.330294 | 316.397  | 118.603  | 316.397  | 118.603  | 317.485  | 117.515  | 0 | 1 | 0.0000 | 0.0084 | 0.0000 | 0.0085 | 0.0000 | 0.0000 | -1.0000 | 0.8413 |

|        |          |          |          |         |          |         |          |         |   |   |        |        |        |        |        |        |         |        |
|--------|----------|----------|----------|---------|----------|---------|----------|---------|---|---|--------|--------|--------|--------|--------|--------|---------|--------|
| SE1138 | SERP1020 | 2.330294 | 1593.075 | 635.925 | 1593.075 | 635.925 | 1594.164 | 634.836 | 0 | 1 | 0.0000 | 0.0016 | 0.0000 | 0.0016 | 0.0000 | 0.0000 | -1.0000 | 0.8413 |
| SE1144 | SERP1026 | 2.330294 | 703.466  | 265.534 | 703.466  | 265.534 | 704.554  | 264.446 | 0 | 1 | 0.0000 | 0.0038 | 0.0000 | 0.0038 | 0.0000 | 0.0000 | -1.0000 | 0.8413 |
| SE1159 | SERP1040 | 2.330294 | 410.856  | 165.144 | 410.856  | 165.144 | 411.944  | 164.056 | 0 | 1 | 0.0000 | 0.0061 | 0.0000 | 0.0061 | 0.0000 | 0.0000 | -1.0000 | 0.8413 |
| SE1180 | SERP1059 | 2.330294 | 374.129  | 147.871 | 374.129  | 147.871 | 375.217  | 146.783 | 0 | 1 | 0.0000 | 0.0068 | 0.0000 | 0.0068 | 0.0000 | 0.0000 | -1.0000 | 0.8413 |
| SE1182 | SERP1061 | 2.330294 | 316.678  | 130.322 | 316.678  | 130.322 | 317.766  | 129.234 | 0 | 1 | 0.0000 | 0.0077 | 0.0000 | 0.0077 | 0.0000 | 0.0000 | -1.0000 | 0.8413 |
| SE1184 | SERP1063 | 2.330294 | 643.950  | 262.050 | 643.950  | 262.050 | 645.038  | 260.962 | 0 | 1 | 0.0000 | 0.0038 | 0.0000 | 0.0038 | 0.0000 | 0.0000 | -1.0000 | 0.8413 |
| SE1185 | SERP1064 | 2.330294 | 543.057  | 212.943 | 543.057  | 212.943 | 544.145  | 211.855 | 0 | 1 | 0.0000 | 0.0047 | 0.0000 | 0.0047 | 0.0000 | 0.0000 | -1.0000 | 0.8413 |
| SE1215 | SERP1095 | 2.330294 | 418.207  | 157.793 | 417.658  | 158.342 | 419.021  | 156.979 | 0 | 1 | 0.0000 | 0.0063 | 0.0000 | 0.0064 | 0.0000 | 0.0000 | -1.0000 | 0.8413 |
| SE1227 | SERP1106 | 2.330294 | 321.624  | 125.376 | 321.624  | 125.376 | 322.713  | 124.287 | 0 | 1 | 0.0000 | 0.0080 | 0.0000 | 0.0080 | 0.0000 | 0.0000 | -1.0000 | 0.8413 |
| SE1231 | SERP1110 | 2.330294 | 443.584  | 177.416 | 443.584  | 177.416 | 444.672  | 176.328 | 0 | 1 | 0.0000 | 0.0056 | 0.0000 | 0.0057 | 0.0000 | 0.0000 | -1.0000 | 0.8413 |
| SE1252 | SERP1132 | 2.330294 | 1009.445 | 379.555 | 1009.445 | 379.555 | 1010.534 | 378.466 | 0 | 1 | 0.0000 | 0.0026 | 0.0000 | 0.0026 | 0.0000 | 0.0000 | -1.0000 | 0.8413 |
| SE1253 | SERP1133 | 2.330294 | 543.439  | 215.561 | 543.439  | 215.561 | 544.527  | 214.473 | 0 | 1 | 0.0000 | 0.0046 | 0.0000 | 0.0047 | 0.0000 | 0.0000 | -1.0000 | 0.8413 |
| SE1255 | SERP1135 | 2.330294 | 289.273  | 112.727 | 289.273  | 112.727 | 290.361  | 111.639 | 0 | 1 | 0.0000 | 0.0089 | 0.0000 | 0.0089 | 0.0000 | 0.0000 | -1.0000 | 0.8413 |
| SE1264 | SERP1145 | 2.330294 | 551.665  | 207.335 | 551.665  | 207.335 | 552.754  | 206.246 | 0 | 1 | 0.0000 | 0.0048 | 0.0000 | 0.0048 | 0.0000 | 0.0000 | -1.0000 | 0.8413 |
| SE1269 | SERP1150 | 2.330294 | 700.022  | 274.978 | 699.322  | 275.678 | 700.760  | 274.240 | 0 | 1 | 0.0000 | 0.0036 | 0.0000 | 0.0036 | 0.0000 | 0.0000 | -1.0000 | 0.8413 |
| SE1299 | SERP1180 | 2.330294 | 307.441  | 118.559 | 307.441  | 118.559 | 308.529  | 117.471 | 0 | 1 | 0.0000 | 0.0084 | 0.0000 | 0.0085 | 0.0000 | 0.0000 | -1.0000 | 0.8413 |
| SE1315 | SERP1196 | 2.330294 | 1574.316 | 612.684 | 1574.316 | 612.684 | 1575.405 | 611.595 | 0 | 1 | 0.0000 | 0.0016 | 0.0000 | 0.0016 | 0.0000 | 0.0000 | -1.0000 | 0.8413 |
| SE1318 | SERP1199 | 2.330294 | 1632.863 | 638.137 | 1632.863 | 638.137 | 1633.951 | 637.049 | 0 | 1 | 0.0000 | 0.0016 | 0.0000 | 0.0016 | 0.0000 | 0.0000 | -1.0000 | 0.8413 |
| SE1350 | SERP1239 | 2.330294 | 932.694  | 366.306 | 932.694  | 366.306 | 933.782  | 365.218 | 0 | 1 | 0.0000 | 0.0027 | 0.0000 | 0.0027 | 0.0000 | 0.0000 | -1.0000 | 0.8413 |
| SE1355 | SERP1244 | 2.330294 | 379.679  | 145.321 | 379.679  | 145.321 | 380.767  | 144.233 | 0 | 1 | 0.0000 | 0.0069 | 0.0000 | 0.0069 | 0.0000 | 0.0000 | -1.0000 | 0.8413 |
| SE1381 | SERP1269 | 2.330294 | 286.919  | 124.081 | 286.919  | 124.081 | 288.007  | 122.993 | 0 | 1 | 0.0000 | 0.0081 | 0.0000 | 0.0081 | 0.0000 | 0.0000 | -1.0000 | 0.8413 |
| SE1387 | SERP1275 | 2.330294 | 892.048  | 358.952 | 892.048  | 358.952 | 893.137  | 357.863 | 0 | 1 | 0.0000 | 0.0028 | 0.0000 | 0.0028 | 0.0000 | 0.0000 | -1.0000 | 0.8413 |
| SE1391 | SERP1279 | 2.330294 | 879.546  | 341.454 | 879.546  | 341.454 | 880.634  | 340.366 | 0 | 1 | 0.0000 | 0.0029 | 0.0000 | 0.0029 | 0.0000 | 0.0000 | -1.0000 | 0.8413 |
| SE1404 | SERP1291 | 2.330294 | 442.607  | 178.393 | 442.607  | 178.393 | 443.695  | 177.305 | 0 | 1 | 0.0000 | 0.0056 | 0.0000 | 0.0056 | 0.0000 | 0.0000 | -1.0000 | 0.8413 |
| SE1436 | SERP1323 | 2.330294 | 597.482  | 227.518 | 597.482  | 227.518 | 598.571  | 226.429 | 0 | 1 | 0.0000 | 0.0044 | 0.0000 | 0.0044 | 0.0000 | 0.0000 | -1.0000 | 0.8413 |
| SE1443 | SERP1330 | 2.330294 | 616.015  | 232.985 | 616.315  | 232.685 | 617.254  | 231.746 | 0 | 1 | 0.0000 | 0.0043 | 0.0000 | 0.0043 | 0.0000 | 0.0000 | -1.0000 | 0.8413 |
| SE1451 | SERP1338 | 2.330294 | 252.515  | 110.485 | 252.515  | 110.485 | 253.603  | 109.397 | 0 | 1 | 0.0000 | 0.0091 | 0.0000 | 0.0091 | 0.0000 | 0.0000 | -1.0000 | 0.8413 |
| SE1518 | SERP1373 | 2.330294 | 309.692  | 113.308 | 309.692  | 113.308 | 310.781  | 112.219 | 0 | 1 | 0.0000 | 0.0088 | 0.0000 | 0.0089 | 0.0000 | 0.0000 | -1.0000 | 0.8413 |
| SE1524 | SERP1379 | 2.330294 | 2110.506 | 826.494 | 2110.506 | 826.494 | 2111.594 | 825.406 | 0 | 1 | 0.0000 | 0.0012 | 0.0000 | 0.0012 | 0.0000 | 0.0000 | -1.0000 | 0.8413 |
| SE1529 | SERP1384 | 2.330294 | 444.004  | 176.996 | 444.004  | 176.996 | 445.092  | 175.908 | 0 | 1 | 0.0000 | 0.0056 | 0.0000 | 0.0057 | 0.0000 | 0.0000 | -1.0000 | 0.8413 |
| SE1554 | SERP1408 | 2.330294 | 594.963  | 233.037 | 594.963  | 233.037 | 596.051  | 231.949 | 0 | 1 | 0.0000 | 0.0043 | 0.0000 | 0.0043 | 0.0000 | 0.0000 | -1.0000 | 0.8413 |
| SE1566 | SERP1419 | 2.330294 | 336.947  | 125.053 | 336.947  | 125.053 | 338.035  | 123.965 | 0 | 1 | 0.0000 | 0.0080 | 0.0000 | 0.0080 | 0.0000 | 0.0000 | -1.0000 | 0.8413 |
| SE1569 | SERP1422 | 2.330294 | 451.426  | 175.574 | 451.426  | 175.574 | 452.514  | 174.486 | 0 | 1 | 0.0000 | 0.0057 | 0.0000 | 0.0057 | 0.0000 | 0.0000 | -1.0000 | 0.8413 |
| SE1572 | SERP1425 | 2.330294 | 284.343  | 108.657 | 284.343  | 108.657 | 285.431  | 107.569 | 0 | 1 | 0.0000 | 0.0092 | 0.0000 | 0.0093 | 0.0000 | 0.0000 | -1.0000 | 0.8413 |
| SE1586 | SERP1439 | 2.330294 | 214.792  | 85.208  | 214.792  | 85.208  | 215.880  | 84.120  | 0 | 1 | 0.0000 | 0.0117 | 0.0000 | 0.0118 | 0.0000 | 0.0000 | -1.0000 | 0.8413 |
| SE1593 | SERP1446 | 2.330294 | 924.474  | 368.526 | 924.474  | 368.526 | 925.563  | 367.437 | 0 | 1 | 0.0000 | 0.0027 | 0.0000 | 0.0027 | 0.0000 | 0.0000 | -1.0000 | 0.8413 |
| SE1606 | SERP1459 | 2.330294 | 278.268  | 99.732  | 277.768  | 100.232 | 279.106  | 98.894  | 0 | 1 | 0.0000 | 0.0100 | 0.0000 | 0.0101 | 0.0000 | 0.0000 | -1.0000 | 0.8413 |
| SE1637 | SERP1492 | 2.330294 | 924.959  | 362.041 | 925.659  | 361.341 | 926.397  | 360.603 | 0 | 1 | 0.0000 | 0.0028 | 0.0000 | 0.0028 | 0.0000 | 0.0000 | -1.0000 | 0.8413 |
| SE1654 | SERP1665 | 2.330294 | 1197.057 | 488.943 | 1196.507 | 489.493 | 1197.870 | 488.130 | 0 | 1 | 0.0000 | 0.0020 | 0.0000 | 0.0020 | 0.0000 | 0.0000 | -1.0000 | 0.8413 |

|        |          |          |          |         |          |         |          |         |    |   |        |        |        |        |        |        |         |        |
|--------|----------|----------|----------|---------|----------|---------|----------|---------|----|---|--------|--------|--------|--------|--------|--------|---------|--------|
| SE1698 | SERP1706 | 2.330294 | 892.072  | 370.928 | 891.522  | 371.478 | 892.885  | 370.115 | 0  | 1 | 0.0000 | 0.0027 | 0.0000 | 0.0027 | 0.0000 | 0.0000 | -1.0000 | 0.8413 |
| SE1701 | SERP1710 | 2.330294 | 618.732  | 245.268 | 618.732  | 245.268 | 619.821  | 244.179 | 0  | 1 | 0.0000 | 0.0041 | 0.0000 | 0.0041 | 0.0000 | 0.0000 | -1.0000 | 0.8413 |
| SE1729 | SERP1738 | 2.330294 | 482.581  | 180.419 | 482.581  | 180.419 | 483.669  | 179.331 | 0  | 1 | 0.0000 | 0.0055 | 0.0000 | 0.0056 | 0.0000 | 0.0000 | -1.0000 | 0.8413 |
| SE1739 | SERP1749 | 2.330294 | 292.671  | 115.329 | 292.671  | 115.329 | 293.759  | 114.241 | 0  | 1 | 0.0000 | 0.0087 | 0.0000 | 0.0087 | 0.0000 | 0.0000 | -1.0000 | 0.8413 |
| SE1781 | SERP1789 | 2.330294 | 1018.138 | 391.862 | 1018.138 | 391.862 | 1019.226 | 390.774 | 0  | 1 | 0.0000 | 0.0026 | 0.0000 | 0.0026 | 0.0000 | 0.0000 | -1.0000 | 0.8413 |
| SE1802 | SERP1810 | 2.330294 | 462.057  | 182.943 | 462.057  | 182.943 | 463.145  | 181.855 | 0  | 1 | 0.0000 | 0.0055 | 0.0000 | 0.0055 | 0.0000 | 0.0000 | -1.0000 | 0.8413 |
| SE1811 | SERP1819 | 2.330294 | 380.524  | 156.476 | 380.524  | 156.476 | 381.612  | 155.388 | 0  | 1 | 0.0000 | 0.0064 | 0.0000 | 0.0064 | 0.0000 | 0.0000 | -1.0000 | 0.8413 |
| SE1823 | SERP1830 | 2.330294 | 436.524  | 184.476 | 435.824  | 185.176 | 437.262  | 183.738 | 0  | 1 | 0.0000 | 0.0054 | 0.0000 | 0.0054 | 0.0000 | 0.0000 | -1.0000 | 0.8413 |
| SE1834 | SERP1843 | 2.330294 | 2249.922 | 903.078 | 2249.922 | 903.078 | 2251.010 | 901.990 | 0  | 1 | 0.0000 | 0.0011 | 0.0000 | 0.0011 | 0.0000 | 0.0000 | -1.0000 | 0.8413 |
| SE1890 | SERP1900 | 2.330294 | 999.059  | 422.941 | 999.059  | 422.941 | 1000.147 | 421.853 | 0  | 1 | 0.0000 | 0.0024 | 0.0000 | 0.0024 | 0.0000 | 0.0000 | -1.0000 | 0.8413 |
| SE1935 | SERP1947 | 2.330294 | 850.345  | 358.655 | 850.372  | 358.628 | 851.447  | 357.553 | 0  | 1 | 0.0000 | 0.0028 | 0.0000 | 0.0028 | 0.0000 | 0.0000 | -1.0000 | 0.8413 |
| SE1952 | SERP1964 | 2.330294 | 291.044  | 122.956 | 291.744  | 122.256 | 292.482  | 121.518 | 0  | 1 | 0.0000 | 0.0082 | 0.0000 | 0.0082 | 0.0000 | 0.0000 | -1.0000 | 0.8413 |
| SE1960 | SERP1969 | 2.330294 | 266.372  | 108.628 | 266.372  | 108.628 | 267.460  | 107.540 | 0  | 1 | 0.0000 | 0.0092 | 0.0000 | 0.0093 | 0.0000 | 0.0000 | -1.0000 | 0.8413 |
| SE1967 | SERP1979 | 2.330294 | 313.227  | 130.773 | 313.227  | 130.773 | 314.315  | 129.685 | 0  | 1 | 0.0000 | 0.0076 | 0.0000 | 0.0077 | 0.0000 | 0.0000 | -1.0000 | 0.8413 |
| SE1977 | SERP1989 | 2.330294 | 224.420  | 87.580  | 224.420  | 87.580  | 225.508  | 86.492  | 0  | 1 | 0.0000 | 0.0114 | 0.0000 | 0.0115 | 0.0000 | 0.0000 | -1.0000 | 0.8413 |
| SE1991 | SERP2003 | 2.330294 | 523.233  | 205.767 | 523.233  | 205.767 | 524.321  | 204.679 | 0  | 1 | 0.0000 | 0.0049 | 0.0000 | 0.0049 | 0.0000 | 0.0000 | -1.0000 | 0.8413 |
| SE2018 | SERP2031 | 2.330294 | 895.513  | 358.487 | 895.513  | 358.487 | 896.601  | 357.399 | 0  | 1 | 0.0000 | 0.0028 | 0.0000 | 0.0028 | 0.0000 | 0.0000 | -1.0000 | 0.8413 |
| SE2024 | SERP2037 | 2.330294 | 542.580  | 231.420 | 542.580  | 231.420 | 543.669  | 230.331 | 0  | 1 | 0.0000 | 0.0043 | 0.0000 | 0.0043 | 0.0000 | 0.0000 | -1.0000 | 0.8413 |
| SE2029 | SERP2042 | 2.330294 | 337.750  | 127.250 | 337.750  | 127.250 | 338.838  | 126.162 | 0  | 1 | 0.0000 | 0.0079 | 0.0000 | 0.0079 | 0.0000 | 0.0000 | -1.0000 | 0.8413 |
| SE2071 | SERP2084 | 2.330294 | 1055.273 | 435.727 | 1055.273 | 435.727 | 1056.361 | 434.639 | 0  | 1 | 0.0000 | 0.0023 | 0.0000 | 0.0023 | 0.0000 | 0.0000 | -1.0000 | 0.8413 |
| SE2102 | SERP2114 | 2.330294 | 1431.092 | 593.908 | 1431.092 | 593.908 | 1432.181 | 592.819 | 0  | 1 | 0.0000 | 0.0017 | 0.0000 | 0.0017 | 0.0000 | 0.0000 | -1.0000 | 0.8413 |
| SE2106 | SERP2118 | 2.330294 | 636.548  | 245.452 | 636.548  | 245.452 | 637.636  | 244.364 | 0  | 1 | 0.0000 | 0.0041 | 0.0000 | 0.0041 | 0.0000 | 0.0000 | -1.0000 | 0.8413 |
| SE2116 | SERP2128 | 2.330294 | 1098.969 | 443.031 | 1098.969 | 443.031 | 1100.057 | 441.943 | 0  | 1 | 0.0000 | 0.0023 | 0.0000 | 0.0023 | 0.0000 | 0.0000 | -1.0000 | 0.8413 |
| SE2119 | SERP2131 | 2.330294 | 1689.040 | 692.960 | 1689.040 | 692.960 | 1690.128 | 691.872 | 0  | 1 | 0.0000 | 0.0014 | 0.0000 | 0.0014 | 0.0000 | 0.0000 | -1.0000 | 0.8413 |
| SE2145 | SERP2156 | 2.330294 | 666.291  | 281.709 | 666.591  | 281.409 | 667.529  | 280.471 | 0  | 1 | 0.0000 | 0.0036 | 0.0000 | 0.0036 | 0.0000 | 0.0000 | -1.0000 | 0.8413 |
| SE2210 | SERP2242 | 2.330294 | 1174.949 | 472.051 | 1175.498 | 471.502 | 1176.312 | 470.688 | 0  | 1 | 0.0000 | 0.0021 | 0.0000 | 0.0021 | 0.0000 | 0.0000 | -1.0000 | 0.8413 |
| SE2212 | SERP2244 | 2.330294 | 841.258  | 322.742 | 841.258  | 322.742 | 842.346  | 321.654 | 0  | 1 | 0.0000 | 0.0031 | 0.0000 | 0.0031 | 0.0000 | 0.0000 | -1.0000 | 0.8413 |
| SE2238 | SERP2270 | 2.330294 | 825.006  | 344.994 | 825.006  | 344.994 | 826.094  | 343.906 | 0  | 1 | 0.0000 | 0.0029 | 0.0000 | 0.0029 | 0.0000 | 0.0000 | -1.0000 | 0.8413 |
| SE0264 | SERP2314 | 2.330294 | 372.677  | 140.323 | 372.677  | 140.323 | 373.765  | 139.235 | 0  | 1 | 0.0000 | 0.0071 | 0.0000 | 0.0072 | 0.0000 | 0.0000 | -1.0000 | 0.8413 |
| SE0255 | SERP2325 | 2.330294 | 733.296  | 304.704 | 733.296  | 304.704 | 734.384  | 303.616 | 0  | 1 | 0.0000 | 0.0033 | 0.0000 | 0.0033 | 0.0000 | 0.0000 | -1.0000 | 0.8413 |
| SE0160 | SERP2411 | 2.330294 | 545.102  | 219.898 | 545.102  | 219.898 | 546.190  | 218.810 | 0  | 1 | 0.0000 | 0.0045 | 0.0000 | 0.0046 | 0.0000 | 0.0000 | -1.0000 | 0.8413 |
| SE0623 | SERP0517 | 2.330294 | 102.308  | 41.692  | 102.308  | 41.692  | 103.397  | 40.603  | 0  | 1 | 0.0000 | 0.0240 | 0.0000 | 0.0244 | 0.0000 | 0.0000 | -1.0167 | 0.8453 |
| SE0412 | SERP0297 | 2.330294 | 579.307  | 230.693 | 579.607  | 230.393 | 580.545  | 229.455 | 0  | 1 | 0.0000 | 0.0043 | 0.0000 | 0.0044 | 0.0000 | 0.0000 | -1.0233 | 0.8469 |
| SE0188 | SERP2386 | 2.330294 | 624.553  | 254.447 | 624.853  | 254.147 | 624.703  | 254.297 | 4  | 4 | 0.0064 | 0.0157 | 0.0064 | 0.0159 | 0.4025 | 0.2870 | -1.0674 | 0.8571 |
| SE0258 | SERP2321 | 2.330294 | 361.848  | 148.152 | 361.998  | 148.002 | 363.011  | 146.989 | 1  | 2 | 0.0028 | 0.0135 | 0.0028 | 0.0136 | 0.2059 | 0.1707 | -1.0697 | 0.8576 |
| SE1015 | SERP0902 | 2.330294 | 1023.723 | 422.277 | 1023.900 | 422.100 | 1024.900 | 421.100 | 1  | 2 | 0.0010 | 0.0047 | 0.0010 | 0.0048 | 0.2083 | 0.1724 | -1.0722 | 0.8582 |
| SE0870 | SERP0761 | 2.330294 | 345.845  | 122.155 | 345.145  | 122.855 | 345.495  | 122.505 | 11 | 7 | 0.0318 | 0.0571 | 0.0325 | 0.0594 | 0.5471 | 0.3536 | -1.0737 | 0.8585 |
| SE0615 | SERP0509 | 2.330294 | 578.601  | 246.399 | 579.300  | 245.700 | 580.039  | 244.961 | 1  | 2 | 0.0017 | 0.0081 | 0.0017 | 0.0082 | 0.2073 | 0.1717 | -1.0754 | 0.8589 |
| SE0210 | SERP2368 | 2.330294 | 530.396  | 216.604 | 529.996  | 217.004 | 531.284  | 215.716 | 1  | 2 | 0.0019 | 0.0092 | 0.0019 | 0.0093 | 0.2043 | 0.1696 | -1.0775 | 0.8594 |

|        |          |          |          |         |          |         |          |         |    |   |        |        |        |        |        |        |         |        |
|--------|----------|----------|----------|---------|----------|---------|----------|---------|----|---|--------|--------|--------|--------|--------|--------|---------|--------|
| SE2114 | SERP2126 | 2.330294 | 1417.387 | 574.613 | 1417.387 | 574.613 | 1418.475 | 573.525 | 1  | 2 | 0.0007 | 0.0035 | 0.0007 | 0.0035 | 0.2000 | 0.1667 | -1.0785 | 0.8596 |
| SE0667 | SERP0558 | 2.330294 | 725.225  | 285.775 | 725.198  | 285.802 | 726.299  | 284.701 | 1  | 2 | 0.0014 | 0.0070 | 0.0014 | 0.0070 | 0.2000 | 0.1667 | -1.0785 | 0.8596 |
| SE1941 | SERP1953 | 2.330294 | 478.833  | 193.167 | 478.533  | 193.467 | 479.771  | 192.229 | 1  | 2 | 0.0021 | 0.0103 | 0.0021 | 0.0104 | 0.2019 | 0.1680 | -1.0790 | 0.8597 |
| SE1460 | SERP1354 | 2.330294 | 562.397  | 220.603 | 562.397  | 220.603 | 563.486  | 219.514 | 1  | 2 | 0.0018 | 0.0091 | 0.0018 | 0.0091 | 0.1978 | 0.1651 | -1.0823 | 0.8604 |
| SE1457 | SERP1351 | 2.330294 | 646.873  | 259.127 | 646.174  | 259.826 | 647.612  | 258.388 | 1  | 2 | 0.0015 | 0.0077 | 0.0015 | 0.0077 | 0.1948 | 0.1630 | -1.0876 | 0.8616 |
| SE0270 | SERP2307 | 2.330294 | 583.137  | 226.863 | 581.787  | 228.213 | 583.550  | 226.450 | 6  | 5 | 0.0103 | 0.0220 | 0.0104 | 0.0223 | 0.4664 | 0.3180 | -1.0879 | 0.8617 |
| SE1512 | SERP1367 | 2.330294 | 657.896  | 263.104 | 658.047  | 262.953 | 659.060  | 261.940 | 1  | 2 | 0.0015 | 0.0076 | 0.0015 | 0.0076 | 0.1974 | 0.1648 | -1.0884 | 0.8618 |
| SE2132 | SERP2144 | 2.330294 | 749.261  | 312.739 | 749.261  | 312.739 | 750.349  | 311.651 | 1  | 2 | 0.0013 | 0.0064 | 0.0013 | 0.0064 | 0.2031 | 0.1688 | -1.0888 | 0.8619 |
| SE2112 | SERP2124 | 2.330294 | 328.400  | 133.600 | 328.674  | 133.326 | 329.625  | 132.375 | 1  | 2 | 0.0030 | 0.0150 | 0.0030 | 0.0151 | 0.1987 | 0.1657 | -1.0889 | 0.8619 |
| SE1876 | SERP1884 | 2.330294 | 336.444  | 134.556 | 336.744  | 134.256 | 337.682  | 133.318 | 1  | 2 | 0.0030 | 0.0149 | 0.0030 | 0.0150 | 0.2000 | 0.1667 | -1.0893 | 0.8620 |
| SE1791 | SERP1799 | 2.330294 | 308.245  | 126.755 | 308.545  | 126.455 | 309.483  | 125.517 | 1  | 2 | 0.0032 | 0.0158 | 0.0032 | 0.0160 | 0.2000 | 0.1667 | -1.0899 | 0.8621 |
| SE1517 | SERP1372 | 2.330294 | 526.958  | 211.042 | 526.334  | 211.666 | 527.734  | 210.266 | 1  | 2 | 0.0019 | 0.0095 | 0.0019 | 0.0095 | 0.2000 | 0.1667 | -1.0913 | 0.8624 |
| SE1961 | SERP1972 | 2.330294 | 1501.552 | 601.448 | 1502.651 | 600.349 | 1503.190 | 599.810 | 6  | 5 | 0.0040 | 0.0083 | 0.0040 | 0.0084 | 0.4762 | 0.3226 | -1.0915 | 0.8625 |
| SE1440 | SERP1327 | 2.330294 | 453.048  | 176.952 | 452.898  | 177.102 | 454.061  | 175.939 | 1  | 2 | 0.0022 | 0.0113 | 0.0022 | 0.0114 | 0.1930 | 0.1618 | -1.0961 | 0.8635 |
| SE0026 | SERP2470 | 2.330294 | 355.652  | 139.348 | 355.652  | 139.348 | 356.741  | 138.259 | 1  | 2 | 0.0028 | 0.0144 | 0.0028 | 0.0145 | 0.1931 | 0.1618 | -1.0961 | 0.8635 |
| SE2004 | SERP2017 | 2.330294 | 970.627  | 403.373 | 970.777  | 403.223 | 971.791  | 402.209 | 1  | 2 | 0.0010 | 0.0050 | 0.0010 | 0.0050 | 0.2000 | 0.1667 | -1.0989 | 0.8641 |
| SE0826 | SERP0717 | 2.330294 | 399.277  | 152.723 | 398.977  | 153.023 | 400.215  | 151.785 | 1  | 2 | 0.0025 | 0.0131 | 0.0025 | 0.0132 | 0.1894 | 0.1592 | -1.1001 | 0.8643 |
| SE1968 | SERP1980 | 2.330294 | 818.802  | 342.198 | 818.802  | 342.198 | 819.890  | 341.110 | 1  | 2 | 0.0012 | 0.0058 | 0.0012 | 0.0059 | 0.2034 | 0.1690 | -1.1002 | 0.8644 |
| SE1433 | SERP1320 | 2.330294 | 689.372  | 261.628 | 689.372  | 261.628 | 690.460  | 260.540 | 1  | 2 | 0.0015 | 0.0076 | 0.0015 | 0.0077 | 0.1948 | 0.1630 | -1.1063 | 0.8657 |
| SE0221 | SERP2359 | 2.330294 | 354.226  | 131.774 | 354.226  | 131.774 | 355.314  | 130.686 | 1  | 2 | 0.0028 | 0.0152 | 0.0028 | 0.0153 | 0.1830 | 0.1547 | -1.1107 | 0.8667 |
| SE1648 | SERP1658 | 2.330294 | 1396.397 | 535.603 | 1396.697 | 535.303 | 1397.635 | 534.365 | 1  | 2 | 0.0007 | 0.0037 | 0.0007 | 0.0037 | 0.1892 | 0.1591 | -1.1142 | 0.8674 |
| SE1951 | SERP1963 | 2.330294 | 290.543  | 108.457 | 290.543  | 108.457 | 291.631  | 107.369 | 1  | 2 | 0.0034 | 0.0184 | 0.0034 | 0.0187 | 0.1818 | 0.1538 | -1.1225 | 0.8692 |
| SE0152 | SERP2418 | 2.330294 | 295.872  | 112.128 | 295.545  | 112.455 | 295.708  | 112.292 | 10 | 7 | 0.0338 | 0.0623 | 0.0346 | 0.0651 | 0.5315 | 0.3470 | -1.1276 | 0.8702 |
| SE1368 | SERP1255 | 2.330294 | 1212.323 | 482.677 | 1212.623 | 482.377 | 1213.561 | 481.439 | 1  | 2 | 0.0008 | 0.0041 | 0.0008 | 0.0042 | 0.1905 | 0.1600 | -1.1302 | 0.8708 |
| SE2213 | SERP2245 | 2.330294 | 543.457  | 212.543 | 543.457  | 212.543 | 544.546  | 211.454 | 4  | 4 | 0.0074 | 0.0188 | 0.0074 | 0.0191 | 0.3874 | 0.2792 | -1.1476 | 0.8744 |
| SE1002 | SERP0889 | 2.330294 | 433.323  | 166.677 | 434.023  | 165.977 | 434.762  | 165.238 | 4  | 4 | 0.0092 | 0.0240 | 0.0093 | 0.0244 | 0.3811 | 0.2760 | -1.1499 | 0.8749 |
| SE0886 | SERP0777 | 2.330294 | 146.757  | 63.243  | 146.757  | 63.243  | 147.845  | 62.155  | 2  | 3 | 0.0136 | 0.0474 | 0.0138 | 0.0490 | 0.2816 | 0.2197 | -1.1583 | 0.8766 |
| SE2019 | SERP2032 | 2.330294 | 736.547  | 313.453 | 737.246  | 312.754 | 737.985  | 312.015 | 2  | 3 | 0.0027 | 0.0096 | 0.0027 | 0.0096 | 0.2813 | 0.2195 | -1.1668 | 0.8784 |
| SE1516 | SERP1371 | 2.330294 | 862.977  | 358.023 | 863.377  | 357.623 | 864.265  | 356.735 | 2  | 3 | 0.0023 | 0.0084 | 0.0023 | 0.0084 | 0.2738 | 0.2150 | -1.1834 | 0.8817 |
| SE0785 | SERP0673 | 2.330294 | 715.919  | 298.081 | 717.069  | 296.931 | 717.582  | 296.418 | 2  | 3 | 0.0028 | 0.0101 | 0.0028 | 0.0102 | 0.2745 | 0.2154 | -1.1878 | 0.8826 |
| SE0456 | SERP0341 | 2.330294 | 1205.250 | 486.750 | 1204.700 | 487.300 | 1206.063 | 485.937 | 7  | 6 | 0.0058 | 0.0123 | 0.0058 | 0.0124 | 0.4677 | 0.3187 | -1.1883 | 0.8826 |
| SE0814 | SERP0705 | 2.330294 | 640.360  | 265.640 | 639.360  | 266.640 | 640.948  | 265.052 | 2  | 3 | 0.0031 | 0.0113 | 0.0031 | 0.0114 | 0.2719 | 0.2138 | -1.1930 | 0.8836 |
| SE0263 | SERP2315 | 2.330294 | 692.874  | 282.126 | 692.874  | 282.126 | 693.962  | 281.038 | 2  | 3 | 0.0029 | 0.0106 | 0.0029 | 0.0107 | 0.2710 | 0.2132 | -1.1973 | 0.8844 |
| SE1375 | SERP1263 | 2.330294 | 672.912  | 269.088 | 672.612  | 269.388 | 673.850  | 268.150 | 2  | 3 | 0.0030 | 0.0111 | 0.0030 | 0.0112 | 0.2679 | 0.2113 | -1.2004 | 0.8850 |
| SE2156 | SERP2166 | 2.330294 | 632.202  | 255.798 | 632.002  | 255.998 | 633.190  | 254.810 | 2  | 3 | 0.0032 | 0.0117 | 0.0032 | 0.0118 | 0.2712 | 0.2133 | -1.2033 | 0.8856 |
| SE0581 | SERP0469 | 2.330294 | 530.835  | 213.165 | 530.835  | 213.165 | 531.923  | 212.077 | 2  | 3 | 0.0038 | 0.0141 | 0.0038 | 0.0142 | 0.2676 | 0.2111 | -1.2047 | 0.8858 |
| SE2077 | SERP2090 | 2.330294 | 349.543  | 142.457 | 349.843  | 142.157 | 350.781  | 141.219 | 2  | 3 | 0.0057 | 0.0211 | 0.0057 | 0.0214 | 0.2664 | 0.2103 | -1.2109 | 0.8870 |
| SE0216 | SERP2364 | 2.330294 | 868.132  | 346.868 | 868.932  | 346.068 | 869.620  | 345.380 | 2  | 3 | 0.0023 | 0.0087 | 0.0023 | 0.0087 | 0.2644 | 0.2091 | -1.2191 | 0.8886 |
| SE0474 | SERP0361 | 2.330294 | 969.684  | 377.316 | 969.684  | 377.316 | 970.773  | 376.227 | 2  | 3 | 0.0021 | 0.0080 | 0.0021 | 0.0080 | 0.2625 | 0.2079 | -1.2194 | 0.8887 |

|        |          |          |          |         |          |         |          |         |      |      |        |        |        |        |        |        |         |        |
|--------|----------|----------|----------|---------|----------|---------|----------|---------|------|------|--------|--------|--------|--------|--------|--------|---------|--------|
| SE1740 | SERP1750 | 2.330294 | 988.338  | 385.662 | 988.038  | 385.962 | 989.276  | 384.724 | 2    | 3    | 0.0020 | 0.0078 | 0.0020 | 0.0078 | 0.2564 | 0.2041 | -1.2307 | 0.8908 |
| SE2199 | SERP2210 | 2.330294 | 1682.076 | 648.924 | 1679.677 | 651.323 | 1681.965 | 649.035 | 7    | 6    | 0.0042 | 0.0092 | 0.0042 | 0.0093 | 0.4516 | 0.3111 | -1.2369 | 0.8919 |
| SE0631 | SERP0523 | 2.330294 | 230.814  | 87.186  | 231.814  | 86.186  | 232.402  | 85.598  | 2    | 3    | 0.0086 | 0.0346 | 0.0087 | 0.0354 | 0.2458 | 0.1973 | -1.2428 | 0.8930 |
| SE1607 | SERP1460 | 2.330294 | 1273.391 | 481.609 | 1272.992 | 482.008 | 1274.280 | 480.720 | 2    | 3    | 0.0016 | 0.0062 | 0.0016 | 0.0063 | 0.2540 | 0.2025 | -1.2486 | 0.8941 |
| SE1772 | SERP1781 | 2.330294 | 1406.515 | 552.485 | 1407.116 | 551.884 | 1407.904 | 551.096 | 2    | 3    | 0.0014 | 0.0054 | 0.0014 | 0.0055 | 0.2545 | 0.2029 | -1.2587 | 0.8959 |
| SE1881 | SERP1891 | 2.330294 | 568.434  | 205.566 | 568.084  | 205.916 | 569.348  | 204.652 | 2    | 3    | 0.0035 | 0.0146 | 0.0035 | 0.0147 | 0.2381 | 0.1923 | -1.2641 | 0.8969 |
| SE0867 | SERP0757 | 2.330294 | 468.661  | 185.339 | 469.760  | 184.240 | 470.298  | 183.702 | 5    | 5    | 0.0107 | 0.0271 | 0.0107 | 0.0276 | 0.3877 | 0.2794 | -1.2710 | 0.8981 |
| SE0273 | SERP2304 | 2.330294 | 407.522  | 168.478 | 406.122  | 169.878 | 406.822  | 169.178 | 3    | 4    | 0.0074 | 0.0236 | 0.0074 | 0.0240 | 0.3083 | 0.2357 | -1.2927 | 0.9019 |
| SE1981 | SERP1994 | 2.330294 | 1049.172 | 423.828 | 1049.322 | 423.678 | 1050.335 | 422.665 | 3    | 4    | 0.0029 | 0.0094 | 0.0029 | 0.0095 | 0.3053 | 0.2339 | -1.2961 | 0.9025 |
| SE0202 | SERP2374 | 2.330294 | 578.845  | 234.155 | 579.769  | 233.231 | 580.395  | 232.605 | 3    | 4    | 0.0052 | 0.0171 | 0.0052 | 0.0173 | 0.3006 | 0.2311 | -1.3148 | 0.9057 |
| SE1109 | SERP0992 | 2.330294 | 430.404  | 181.596 | 431.653  | 180.347 | 431.028  | 180.972 | 13.3 | 10.8 | 0.0307 | 0.0594 | 0.0314 | 0.0619 | 0.5073 | 0.3365 | -1.3177 | 0.9062 |
| SE1266 | SERP1147 | 2.330294 | 799.281  | 319.719 | 799.581  | 319.419 | 800.519  | 318.481 | 3    | 4    | 0.0038 | 0.0125 | 0.0038 | 0.0126 | 0.3016 | 0.2317 | -1.3187 | 0.9064 |
| SE0634 | SERP0526 | 2.330294 | 254.672  | 102.328 | 253.695  | 103.305 | 255.272  | 101.728 | 3    | 4    | 0.0118 | 0.0389 | 0.0119 | 0.0399 | 0.2982 | 0.2297 | -1.3196 | 0.9065 |
| SE1794 | SERP1802 | 2.330294 | 622.739  | 235.261 | 621.739  | 236.261 | 623.328  | 234.672 | 3    | 4    | 0.0048 | 0.0170 | 0.0048 | 0.0172 | 0.2791 | 0.2182 | -1.3710 | 0.9148 |
| SE0849 | SERP0739 | 2.330294 | 94.507   | 37.493  | 94.507   | 37.493  | 95.595   | 36.405  | 0    | 2    | 0.0000 | 0.0533 | 0.0000 | 0.0553 | 0.0000 | 0.0000 | -1.3791 | 0.9161 |
| SE0259 | SERP2320 | 2.330294 | 1128.688 | 461.312 | 1128.688 | 461.312 | 1129.776 | 460.224 | 0    | 2    | 0.0000 | 0.0043 | 0.0000 | 0.0043 | 0.0000 | 0.0000 | -1.3871 | 0.9173 |
| SE1744 | SERP1753 | 2.330294 | 106.834  | 40.166  | 106.834  | 40.166  | 107.922  | 39.078  | 0    | 2    | 0.0000 | 0.0498 | 0.0000 | 0.0515 | 0.0000 | 0.0000 | -1.3919 | 0.9180 |
| SE1990 | SERP2002 | 2.330294 | 103.830  | 40.170  | 103.830  | 40.170  | 104.918  | 39.082  | 0    | 2    | 0.0000 | 0.0498 | 0.0000 | 0.0515 | 0.0000 | 0.0000 | -1.3919 | 0.9180 |
| SE0834 | SERP0724 | 2.330294 | 191.036  | 72.964  | 191.586  | 72.414  | 192.399  | 71.601  | 0    | 2    | 0.0000 | 0.0275 | 0.0000 | 0.0280 | 0.0000 | 0.0000 | -1.3930 | 0.9182 |
| SE1548 | SERP1401 | 2.330294 | 909.673  | 377.327 | 910.296  | 376.704 | 911.073  | 375.927 | 0    | 2    | 0.0000 | 0.0053 | 0.0000 | 0.0053 | 0.0000 | 0.0000 | -1.3947 | 0.9185 |
| SE0473 | SERP0360 | 2.330294 | 836.275  | 333.725 | 836.275  | 333.725 | 837.363  | 332.637 | 0    | 2    | 0.0000 | 0.0060 | 0.0000 | 0.0060 | 0.0000 | 0.0000 | -1.3953 | 0.9185 |
| SE0406 | SERP0291 | 2.330294 | 586.387  | 247.613 | 586.387  | 247.613 | 587.475  | 246.525 | 0    | 2    | 0.0000 | 0.0081 | 0.0000 | 0.0081 | 0.0000 | 0.0000 | -1.3966 | 0.9187 |
| SE0208 | SERP2370 | 2.330294 | 628.758  | 247.242 | 628.758  | 247.242 | 629.846  | 246.154 | 0    | 2    | 0.0000 | 0.0081 | 0.0000 | 0.0081 | 0.0000 | 0.0000 | -1.3966 | 0.9187 |
| SE1093 | SERP0980 | 2.330294 | 145.909  | 55.091  | 145.909  | 55.091  | 146.997  | 54.003  | 0    | 2    | 0.0000 | 0.0363 | 0.0000 | 0.0372 | 0.0000 | 0.0000 | -1.3985 | 0.9190 |
| SE0472 | SERP0359 | 2.330294 | 1378.410 | 571.590 | 1378.410 | 571.590 | 1379.498 | 570.502 | 0    | 2    | 0.0000 | 0.0035 | 0.0000 | 0.0035 | 0.0000 | 0.0000 | -1.4000 | 0.9192 |
| SE1339 | SERP1228 | 2.330294 | 1908.921 | 719.079 | 1908.921 | 719.079 | 1910.009 | 717.991 | 0    | 2    | 0.0000 | 0.0028 | 0.0000 | 0.0028 | 0.0000 | 0.0000 | -1.4000 | 0.9192 |
| SE2407 | SERP0014 | 2.330294 | 798.680  | 317.320 | 798.680  | 317.320 | 799.769  | 316.231 | 0    | 2    | 0.0000 | 0.0063 | 0.0000 | 0.0063 | 0.0000 | 0.0000 | -1.4000 | 0.9192 |
| SE0136 | SERP2429 | 2.330294 | 218.703  | 93.297  | 218.703  | 93.297  | 219.791  | 92.209  | 0    | 2    | 0.0000 | 0.0214 | 0.0000 | 0.0217 | 0.0000 | 0.0000 | -1.4000 | 0.9192 |
| SE0788 | SERP0677 | 2.330294 | 155.436  | 60.564  | 155.436  | 60.564  | 156.524  | 59.476  | 0    | 2    | 0.0000 | 0.0330 | 0.0000 | 0.0338 | 0.0000 | 0.0000 | -1.4025 | 0.9196 |
| SE0405 | SERP0290 | 2.330294 | 675.274  | 251.726 | 675.274  | 251.726 | 676.362  | 250.638 | 0    | 2    | 0.0000 | 0.0079 | 0.0000 | 0.0080 | 0.0000 | 0.0000 | -1.4035 | 0.9198 |
| SE0907 | SERP0798 | 2.330294 | 165.713  | 65.287  | 165.713  | 65.287  | 166.802  | 64.198  | 0    | 2    | 0.0000 | 0.0306 | 0.0000 | 0.0313 | 0.0000 | 0.0000 | -1.4036 | 0.9198 |
| SE1767 | SERP1776 | 2.330294 | 726.957  | 302.043 | 726.656  | 302.344 | 727.895  | 301.105 | 0    | 2    | 0.0000 | 0.0066 | 0.0000 | 0.0066 | 0.0000 | 0.0000 | -1.4043 | 0.9199 |
| SE1595 | SERP1448 | 2.330294 | 442.472  | 181.528 | 442.472  | 181.528 | 443.560  | 180.440 | 0    | 2    | 0.0000 | 0.0110 | 0.0000 | 0.0111 | 0.0000 | 0.0000 | -1.4051 | 0.9200 |
| SE0225 | SERP2355 | 2.330294 | 451.298  | 193.702 | 451.298  | 193.702 | 452.387  | 192.613 | 0    | 2    | 0.0000 | 0.0103 | 0.0000 | 0.0104 | 0.0000 | 0.0000 | -1.4054 | 0.9200 |
| SE1438 | SERP1325 | 2.330294 | 324.194  | 134.806 | 323.344  | 135.656 | 324.857  | 134.143 | 0    | 2    | 0.0000 | 0.0148 | 0.0000 | 0.0149 | 0.0000 | 0.0000 | -1.4057 | 0.9201 |
| SE1449 | SERP1336 | 2.330294 | 503.885  | 207.115 | 503.885  | 207.115 | 504.973  | 206.027 | 0    | 2    | 0.0000 | 0.0097 | 0.0000 | 0.0097 | 0.0000 | 0.0000 | -1.4058 | 0.9201 |
| SE0686 | SERP0576 | 2.330294 | 275.776  | 117.224 | 275.776  | 117.224 | 276.864  | 116.136 | 0    | 2    | 0.0000 | 0.0171 | 0.0000 | 0.0173 | 0.0000 | 0.0000 | -1.4065 | 0.9202 |
| SE0900 | SERP0791 | 2.330294 | 265.586  | 106.414 | 265.586  | 106.414 | 266.674  | 105.326 | 0    | 2    | 0.0000 | 0.0188 | 0.0000 | 0.0190 | 0.0000 | 0.0000 | -1.4074 | 0.9203 |
| SE1087 | SERP0974 | 2.330294 | 191.387  | 75.613  | 191.387  | 75.613  | 192.475  | 74.525  | 0    | 2    | 0.0000 | 0.0265 | 0.0000 | 0.0269 | 0.0000 | 0.0000 | -1.4084 | 0.9205 |

|        |          |          |          |         |          |         |          |         |   |   |        |        |        |        |        |        |         |        |
|--------|----------|----------|----------|---------|----------|---------|----------|---------|---|---|--------|--------|--------|--------|--------|--------|---------|--------|
| SE2082 | SERP2096 | 2.330294 | 719.151  | 321.849 | 719.151  | 321.849 | 720.239  | 320.761 | 0 | 2 | 0.0000 | 0.0062 | 0.0000 | 0.0062 | 0.0000 | 0.0000 | -1.4091 | 0.9206 |
| SE1795 | SERP1803 | 2.330294 | 573.464  | 233.536 | 573.464  | 233.536 | 574.552  | 232.448 | 0 | 2 | 0.0000 | 0.0086 | 0.0000 | 0.0086 | 0.0000 | 0.0000 | -1.4098 | 0.9207 |
| SE0838 | SERP0728 | 2.330294 | 222.370  | 89.630  | 222.370  | 89.630  | 223.458  | 88.542  | 0 | 2 | 0.0000 | 0.0223 | 0.0000 | 0.0227 | 0.0000 | 0.0000 | -1.4099 | 0.9207 |
| SE1942 | SERP1954 | 2.330294 | 962.692  | 390.308 | 961.992  | 391.008 | 963.430  | 389.570 | 4 | 5 | 0.0042 | 0.0128 | 0.0042 | 0.0129 | 0.3256 | 0.2456 | -1.4104 | 0.9208 |
| SE1265 | SERP1146 | 2.330294 | 680.401  | 255.599 | 680.401  | 255.599 | 681.489  | 254.511 | 0 | 2 | 0.0000 | 0.0078 | 0.0000 | 0.0079 | 0.0000 | 0.0000 | -1.4107 | 0.9208 |
| SE1829 | SERP1838 | 2.330294 | 605.332  | 255.668 | 605.332  | 255.668 | 606.420  | 254.580 | 0 | 2 | 0.0000 | 0.0078 | 0.0000 | 0.0079 | 0.0000 | 0.0000 | -1.4107 | 0.9208 |
| SE0198 | SERP2378 | 2.330294 | 491.337  | 195.663 | 491.037  | 195.963 | 492.275  | 194.725 | 0 | 2 | 0.0000 | 0.0102 | 0.0000 | 0.0103 | 0.0000 | 0.0000 | -1.4110 | 0.9209 |
| SE0804 | SERP0693 | 2.330294 | 440.322  | 168.678 | 440.322  | 168.678 | 441.410  | 167.590 | 0 | 2 | 0.0000 | 0.0119 | 0.0000 | 0.0120 | 0.0000 | 0.0000 | -1.4118 | 0.9210 |
| SE2124 | SERP1880 | 2.330294 | 545.224  | 225.776 | 545.224  | 225.776 | 546.312  | 224.688 | 0 | 2 | 0.0000 | 0.0089 | 0.0000 | 0.0089 | 0.0000 | 0.0000 | -1.4127 | 0.9211 |
| SE2014 | SERP2027 | 2.330294 | 486.778  | 212.222 | 486.078  | 212.922 | 486.428  | 212.572 | 1 | 3 | 0.0021 | 0.0141 | 0.0021 | 0.0142 | 0.1479 | 0.1288 | -1.4133 | 0.9212 |
| SE2000 | SERP2013 | 2.330294 | 508.760  | 190.240 | 508.760  | 190.240 | 509.848  | 189.152 | 0 | 2 | 0.0000 | 0.0105 | 0.0000 | 0.0106 | 0.0000 | 0.0000 | -1.4133 | 0.9212 |
| SE2140 | SERP2151 | 2.330294 | 613.137  | 244.863 | 613.438  | 244.562 | 614.376  | 243.624 | 0 | 2 | 0.0000 | 0.0082 | 0.0000 | 0.0082 | 0.0000 | 0.0000 | -1.4138 | 0.9213 |
| SE0600 | SERP0489 | 2.330294 | 726.726  | 296.274 | 728.275  | 294.725 | 728.589  | 294.411 | 4 | 5 | 0.0055 | 0.0169 | 0.0055 | 0.0171 | 0.3216 | 0.2434 | -1.4158 | 0.9216 |
| SE0189 | SERP2385 | 2.330294 | 980.577  | 399.423 | 982.278  | 397.722 | 981.427  | 398.573 | 9 | 8 | 0.0092 | 0.0201 | 0.0092 | 0.0203 | 0.4532 | 0.3119 | -1.4160 | 0.9216 |
| SE1221 | SERP1101 | 2.330294 | 951.464  | 392.536 | 951.464  | 392.536 | 952.553  | 391.447 | 0 | 2 | 0.0000 | 0.0051 | 0.0000 | 0.0051 | 0.0000 | 0.0000 | -1.4167 | 0.9217 |
| SE1827 | SERP1835 | 2.330294 | 935.903  | 396.097 | 935.903  | 396.097 | 936.991  | 395.009 | 0 | 2 | 0.0000 | 0.0050 | 0.0000 | 0.0051 | 0.0000 | 0.0000 | -1.4167 | 0.9217 |
| SE2130 | SERP2142 | 2.330294 | 982.378  | 394.622 | 982.378  | 394.622 | 983.466  | 393.534 | 0 | 2 | 0.0000 | 0.0051 | 0.0000 | 0.0051 | 0.0000 | 0.0000 | -1.4167 | 0.9217 |
| SE2258 | SERP2288 | 2.330294 | 1096.032 | 436.968 | 1096.831 | 436.169 | 1097.520 | 435.480 | 4 | 5 | 0.0036 | 0.0115 | 0.0037 | 0.0115 | 0.3217 | 0.2434 | -1.4175 | 0.9218 |
| SE1933 | SERP1945 | 2.330294 | 465.228  | 179.772 | 465.228  | 179.772 | 466.317  | 178.683 | 0 | 2 | 0.0000 | 0.0111 | 0.0000 | 0.0112 | 0.0000 | 0.0000 | -1.4177 | 0.9219 |
| SE2017 | SERP2030 | 2.330294 | 440.703  | 192.297 | 440.403  | 192.597 | 441.641  | 191.359 | 0 | 2 | 0.0000 | 0.0104 | 0.0000 | 0.0105 | 0.0000 | 0.0000 | -1.4189 | 0.9220 |
| SE2089 | SERP2103 | 2.330294 | 1149.894 | 452.106 | 1149.894 | 452.106 | 1150.982 | 451.018 | 0 | 2 | 0.0000 | 0.0044 | 0.0000 | 0.0044 | 0.0000 | 0.0000 | -1.4194 | 0.9221 |
| SE1885 | SERP1895 | 2.330294 | 481.866  | 205.134 | 481.943  | 205.057 | 482.993  | 204.007 | 0 | 2 | 0.0000 | 0.0098 | 0.0000 | 0.0098 | 0.0000 | 0.0000 | -1.4203 | 0.9222 |
| SE2136 | SERP2148 | 2.330294 | 955.648  | 373.352 | 955.648  | 373.352 | 956.736  | 372.264 | 0 | 2 | 0.0000 | 0.0054 | 0.0000 | 0.0054 | 0.0000 | 0.0000 | -1.4211 | 0.9223 |
| SE0411 | SERP0296 | 2.330294 | 570.688  | 221.312 | 570.661  | 221.339 | 571.763  | 220.237 | 0 | 2 | 0.0000 | 0.0090 | 0.0000 | 0.0091 | 0.0000 | 0.0000 | -1.4219 | 0.9225 |
| SE1751 | SERP1760 | 2.330294 | 1262.462 | 540.538 | 1262.462 | 540.538 | 1263.550 | 539.450 | 0 | 2 | 0.0000 | 0.0037 | 0.0000 | 0.0037 | 0.0000 | 0.0000 | -1.4231 | 0.9226 |
| SE1555 | SERP1409 | 2.330294 | 1085.314 | 429.686 | 1085.314 | 429.686 | 1086.402 | 428.598 | 0 | 2 | 0.0000 | 0.0047 | 0.0000 | 0.0047 | 0.0000 | 0.0000 | -1.4242 | 0.9228 |
| SE1959 | SERP1968 | 2.330294 | 1017.485 | 425.515 | 1017.485 | 425.515 | 1018.574 | 424.426 | 0 | 2 | 0.0000 | 0.0047 | 0.0000 | 0.0047 | 0.0000 | 0.0000 | -1.4242 | 0.9228 |
| SE0916 | SERP0807 | 2.330294 | 241.586  | 106.414 | 241.886  | 106.114 | 242.824  | 105.176 | 0 | 2 | 0.0000 | 0.0188 | 0.0000 | 0.0191 | 0.0000 | 0.0000 | -1.4254 | 0.9230 |
| SE0816 | SERP0707 | 2.330294 | 321.743  | 137.257 | 321.443  | 137.557 | 322.681  | 136.319 | 0 | 2 | 0.0000 | 0.0146 | 0.0000 | 0.0147 | 0.0000 | 0.0000 | -1.4272 | 0.9232 |
| SE1680 | SERP1689 | 2.330294 | 972.122  | 380.878 | 972.122  | 380.878 | 973.210  | 379.790 | 0 | 2 | 0.0000 | 0.0053 | 0.0000 | 0.0053 | 0.0000 | 0.0000 | -1.4324 | 0.9240 |
| SE2354 | SERP0063 | 2.330294 | 972.799  | 413.201 | 972.799  | 413.201 | 973.887  | 412.113 | 0 | 2 | 0.0000 | 0.0048 | 0.0000 | 0.0049 | 0.0000 | 0.0000 | -1.4412 | 0.9252 |
| SE0613 | SERP0507 | 2.330294 | 729.947  | 293.053 | 729.920  | 293.080 | 731.022  | 291.978 | 4 | 5 | 0.0055 | 0.0171 | 0.0055 | 0.0173 | 0.3179 | 0.2412 | -1.4461 | 0.9259 |
| SE1199 | SERP1079 | 2.330294 | 1010.518 | 408.482 | 1009.969 | 409.031 | 1011.332 | 407.668 | 1 | 3 | 0.0010 | 0.0073 | 0.0010 | 0.0074 | 0.1351 | 0.1190 | -1.4497 | 0.9264 |
| SE2400 | SERP0021 | 2.330294 | 539.111  | 216.889 | 539.411  | 216.589 | 540.349  | 215.651 | 1 | 3 | 0.0019 | 0.0138 | 0.0019 | 0.0140 | 0.1357 | 0.1195 | -1.4544 | 0.9271 |
| SE0254 | SERP2326 | 2.330294 | 688.771  | 262.229 | 687.771  | 263.229 | 689.360  | 261.640 | 1 | 3 | 0.0015 | 0.0114 | 0.0015 | 0.0115 | 0.1304 | 0.1154 | -1.4565 | 0.9274 |
| SE2232 | SERP2264 | 2.330294 | 1456.506 | 571.494 | 1456.382 | 571.618 | 1456.444 | 571.556 | 7 | 7 | 0.0048 | 0.0122 | 0.0048 | 0.0123 | 0.3902 | 0.2807 | -1.4569 | 0.9274 |
| SE2117 | SERP2129 | 2.330294 | 616.383  | 250.617 | 616.383  | 250.617 | 617.472  | 249.528 | 1 | 3 | 0.0016 | 0.0120 | 0.0016 | 0.0121 | 0.1322 | 0.1168 | -1.4623 | 0.9282 |
| SE1737 | SERP1747 | 2.330294 | 508.253  | 199.747 | 508.553  | 199.447 | 509.491  | 198.509 | 1 | 3 | 0.0020 | 0.0150 | 0.0020 | 0.0152 | 0.1316 | 0.1163 | -1.4627 | 0.9282 |
| SE0267 | SERP2311 | 2.330294 | 370.624  | 145.376 | 370.624  | 145.376 | 371.713  | 144.287 | 1 | 3 | 0.0027 | 0.0206 | 0.0027 | 0.0209 | 0.1292 | 0.1144 | -1.4680 | 0.9290 |

|        |          |          |          |         |          |         |          |         |      |      |        |        |        |        |        |        |         |        |
|--------|----------|----------|----------|---------|----------|---------|----------|---------|------|------|--------|--------|--------|--------|--------|--------|---------|--------|
| SE2214 | SERP2246 | 2.330294 | 491.667  | 192.333 | 490.790  | 193.210 | 492.317  | 191.683 | 1    | 3    | 0.0020 | 0.0156 | 0.0020 | 0.0157 | 0.1274 | 0.1130 | -1.4704 | 0.9293 |
| SE1681 | SERP1690 | 2.330294 | 767.354  | 303.646 | 767.354  | 303.646 | 768.442  | 302.558 | 1    | 3    | 0.0013 | 0.0099 | 0.0013 | 0.0099 | 0.1313 | 0.1161 | -1.4710 | 0.9294 |
| SE0193 | SERP2383 | 2.330294 | 715.009  | 277.991 | 715.310  | 277.690 | 716.248  | 276.752 | 1    | 3    | 0.0014 | 0.0108 | 0.0014 | 0.0109 | 0.1284 | 0.1138 | -1.4720 | 0.9295 |
| SE0201 | SERP2375 | 2.330294 | 607.371  | 229.629 | 606.344  | 230.656 | 607.946  | 229.054 | 4    | 5    | 0.0066 | 0.0217 | 0.0066 | 0.0220 | 0.3000 | 0.2308 | -1.4757 | 0.9300 |
| SE1871 | SERP1879 | 2.330294 | 1426.461 | 544.539 | 1426.912 | 544.088 | 1427.775 | 543.225 | 4    | 5    | 0.0028 | 0.0092 | 0.0028 | 0.0092 | 0.3043 | 0.2333 | -1.4772 | 0.9302 |
| SE2397 | SERP0024 | 2.330294 | 414.923  | 161.077 | 415.724  | 160.276 | 416.412  | 159.588 | 1    | 3    | 0.0024 | 0.0187 | 0.0024 | 0.0189 | 0.1270 | 0.1127 | -1.4783 | 0.9303 |
| SE0494 | SERP0379 | 2.330294 | 1381.072 | 556.928 | 1381.222 | 556.778 | 1382.235 | 555.765 | 1    | 3    | 0.0007 | 0.0054 | 0.0007 | 0.0054 | 0.1296 | 0.1148 | -1.4789 | 0.9304 |
| SE2012 | SERP2025 | 2.330294 | 545.364  | 210.636 | 545.364  | 210.636 | 546.453  | 209.547 | 1    | 3    | 0.0018 | 0.0142 | 0.0018 | 0.0144 | 0.1250 | 0.1111 | -1.4836 | 0.9310 |
| SE0999 | SERP0887 | 2.330294 | 521.640  | 207.360 | 524.013  | 204.987 | 522.826  | 206.174 | 13.5 | 10.5 | 0.0258 | 0.0509 | 0.0263 | 0.0527 | 0.4991 | 0.3329 | -1.4858 | 0.9313 |
| SE1588 | SERP1441 | 2.330294 | 872.467  | 333.533 | 872.767  | 333.233 | 873.705  | 332.295 | 1    | 3    | 0.0011 | 0.0090 | 0.0011 | 0.0091 | 0.1209 | 0.1078 | -1.5052 | 0.9339 |
| SE2154 | SERP2165 | 2.330294 | 967.985  | 391.015 | 969.436  | 389.564 | 969.799  | 389.201 | 5    | 6    | 0.0052 | 0.0154 | 0.0052 | 0.0155 | 0.3355 | 0.2512 | -1.5145 | 0.9351 |
| SE1947 | SERP1959 | 2.330294 | 464.785  | 180.215 | 464.382  | 180.618 | 465.672  | 179.328 | 7    | 7    | 0.0151 | 0.0388 | 0.0152 | 0.0398 | 0.3819 | 0.2764 | -1.5154 | 0.9352 |
| SE0835 | SERP0725 | 2.330294 | 367.720  | 151.280 | 367.970  | 151.030 | 368.933  | 150.067 | 5    | 6    | 0.0136 | 0.0397 | 0.0137 | 0.0408 | 0.3358 | 0.2514 | -1.5162 | 0.9353 |
| SE0330 | SERP0206 | 2.330294 | 398.931  | 165.069 | 398.931  | 165.069 | 400.019  | 163.981 | 2    | 4    | 0.0050 | 0.0242 | 0.0050 | 0.0246 | 0.2033 | 0.1689 | -1.5212 | 0.9359 |
| SE0248 | SERP2333 | 2.330294 | 1207.422 | 493.578 | 1207.898 | 493.102 | 1208.748 | 492.252 | 2    | 4    | 0.0017 | 0.0081 | 0.0017 | 0.0082 | 0.2073 | 0.1717 | -1.5215 | 0.9359 |
| SE0182 | SERP2393 | 2.330294 | 484.638  | 199.362 | 484.939  | 199.061 | 485.877  | 198.123 | 2    | 4    | 0.0041 | 0.0201 | 0.0041 | 0.0204 | 0.2010 | 0.1673 | -1.5371 | 0.9379 |
| SE0266 | SERP2312 | 2.330294 | 1067.971 | 426.029 | 1067.820 | 426.180 | 1068.984 | 425.016 | 2    | 4    | 0.0019 | 0.0094 | 0.0019 | 0.0094 | 0.2021 | 0.1681 | -1.5380 | 0.9380 |
| SE1521 | SERP1376 | 2.330294 | 703.709  | 271.291 | 704.009  | 270.991 | 704.947  | 270.053 | 2    | 4    | 0.0028 | 0.0148 | 0.0028 | 0.0149 | 0.1879 | 0.1582 | -1.5589 | 0.9405 |
| SE1463 | SERP1357 | 2.330294 | 719.285  | 279.715 | 719.162  | 279.838 | 720.312  | 278.688 | 5    | 6    | 0.0070 | 0.0214 | 0.0070 | 0.0218 | 0.3211 | 0.2431 | -1.5704 | 0.9418 |
| SE2094 | SERP2108 | 2.330294 | 227.116  | 87.884  | 226.365  | 88.635  | 226.740  | 88.260  | 5    | 6    | 0.0221 | 0.0680 | 0.0224 | 0.0713 | 0.3142 | 0.2391 | -1.5715 | 0.9420 |
| SE2356 | SERP0061 | 2.330294 | 546.535  | 230.465 | 546.835  | 230.165 | 547.773  | 229.227 | 3    | 5    | 0.0055 | 0.0217 | 0.0055 | 0.0220 | 0.2500 | 0.2000 | -1.5859 | 0.9436 |
| SE0211 | SERP2367 | 2.330294 | 841.621  | 346.379 | 842.744  | 345.256 | 843.271  | 344.729 | 3    | 5    | 0.0036 | 0.0145 | 0.0036 | 0.0146 | 0.2466 | 0.1978 | -1.5882 | 0.9439 |
| SE0348 | SERP0222 | 2.330294 | 191.611  | 66.389  | 190.762  | 67.238  | 192.275  | 65.725  | 2    | 4    | 0.0105 | 0.0599 | 0.0105 | 0.0624 | 0.1683 | 0.1440 | -1.5991 | 0.9451 |
| SE2247 | SERP2279 | 2.330294 | 1124.694 | 429.306 | 1124.394 | 429.606 | 1125.632 | 428.368 | 8    | 8    | 0.0071 | 0.0186 | 0.0071 | 0.0189 | 0.3757 | 0.2731 | -1.6501 | 0.9505 |
| SE2075 | SERP2088 | 2.330294 | 584.017  | 222.983 | 583.141  | 223.859 | 584.667  | 222.333 | 6    | 7    | 0.0103 | 0.0313 | 0.0104 | 0.0320 | 0.3250 | 0.2453 | -1.6741 | 0.9529 |
| SE1587 | SERP1440 | 2.330294 | 1082.876 | 450.124 | 1083.876 | 449.124 | 1084.464 | 448.536 | 4    | 6    | 0.0037 | 0.0133 | 0.0037 | 0.0135 | 0.2741 | 0.2151 | -1.6934 | 0.9548 |
| SE0272 | SERP2305 | 2.330294 | 885.213  | 356.787 | 886.213  | 355.787 | 886.801  | 355.199 | 4    | 6    | 0.0045 | 0.0168 | 0.0045 | 0.0170 | 0.2647 | 0.2093 | -1.6965 | 0.9551 |
| SE0720 | SERP0609 | 2.330294 | 1131.370 | 428.630 | 1131.370 | 428.630 | 1132.458 | 427.542 | 0    | 3    | 0.0000 | 0.0070 | 0.0000 | 0.0070 | 0.0000 | 0.0000 | -1.7073 | 0.9561 |
| SE1248 | SERP1127 | 2.330294 | 784.152  | 319.848 | 784.152  | 319.848 | 785.240  | 318.760 | 0    | 3    | 0.0000 | 0.0094 | 0.0000 | 0.0094 | 0.0000 | 0.0000 | -1.7091 | 0.9563 |
| SE1603 | SERP1456 | 2.330294 | 984.320  | 392.680 | 983.269  | 393.731 | 984.882  | 392.118 | 4    | 6    | 0.0041 | 0.0153 | 0.0041 | 0.0154 | 0.2662 | 0.2103 | -1.7096 | 0.9563 |
| SE0782 | SERP0670 | 2.330294 | 1218.277 | 497.723 | 1217.727 | 498.273 | 1219.090 | 496.910 | 0    | 3    | 0.0000 | 0.0060 | 0.0000 | 0.0060 | 0.0000 | 0.0000 | -1.7143 | 0.9568 |
| SE1870 | SERP1878 | 2.330294 | 515.896  | 210.104 | 515.896  | 210.104 | 516.985  | 209.015 | 0    | 3    | 0.0000 | 0.0143 | 0.0000 | 0.0144 | 0.0000 | 0.0000 | -1.7143 | 0.9568 |
| SE0638 | SERP0530 | 2.330294 | 266.618  | 105.382 | 266.618  | 105.382 | 267.707  | 104.293 | 0    | 3    | 0.0000 | 0.0285 | 0.0000 | 0.0290 | 0.0000 | 0.0000 | -1.7160 | 0.9569 |
| SE0566 | SERP0451 | 2.330294 | 328.445  | 139.555 | 328.445  | 139.555 | 329.533  | 138.467 | 0    | 3    | 0.0000 | 0.0215 | 0.0000 | 0.0218 | 0.0000 | 0.0000 | -1.7165 | 0.9570 |
| SE0561 | SERP0446 | 2.330294 | 918.988  | 383.012 | 918.988  | 383.012 | 920.076  | 381.924 | 0    | 3    | 0.0000 | 0.0078 | 0.0000 | 0.0079 | 0.0000 | 0.0000 | -1.7174 | 0.9570 |
| SE1012 | SERP0900 | 2.330294 | 578.189  | 225.811 | 578.189  | 225.811 | 579.277  | 224.723 | 0    | 3    | 0.0000 | 0.0133 | 0.0000 | 0.0134 | 0.0000 | 0.0000 | -1.7179 | 0.9571 |
| SE2412 | SERP0009 | 2.330294 | 253.762  | 103.238 | 253.762  | 103.238 | 254.850  | 102.150 | 0    | 3    | 0.0000 | 0.0291 | 0.0000 | 0.0296 | 0.0000 | 0.0000 | -1.7209 | 0.9574 |
| SE0229 | SERP2351 | 2.330294 | 712.625  | 286.375 | 712.625  | 286.375 | 713.714  | 285.286 | 0    | 3    | 0.0000 | 0.0105 | 0.0000 | 0.0105 | 0.0000 | 0.0000 | -1.7213 | 0.9574 |
| SE0407 | SERP0292 | 2.330294 | 524.666  | 219.334 | 524.666  | 219.334 | 525.754  | 218.246 | 0    | 3    | 0.0000 | 0.0137 | 0.0000 | 0.0138 | 0.0000 | 0.0000 | -1.7250 | 0.9577 |



|        |          |          |          |         |          |         |          |         |      |      |        |        |        |        |        |        |         |        |
|--------|----------|----------|----------|---------|----------|---------|----------|---------|------|------|--------|--------|--------|--------|--------|--------|---------|--------|
| SE0560 | SERP0445 | 2.330294 | 1077.075 | 437.925 | 1077.075 | 437.925 | 1078.163 | 436.837 | 0    | 3    | 0.0000 | 0.0069 | 0.0000 | 0.0069 | 0.0000 | 0.0000 | -1.7250 | 0.9577 |
| SE2417 | SERP0003 | 2.330294 | 981.911  | 395.089 | 982.212  | 394.788 | 983.150  | 393.850 | 0    | 3    | 0.0000 | 0.0076 | 0.0000 | 0.0076 | 0.0000 | 0.0000 | -1.7273 | 0.9579 |
| SE1585 | SERP1438 | 2.330294 | 1021.867 | 433.133 | 1021.867 | 433.133 | 1022.955 | 432.045 | 1    | 4    | 0.0010 | 0.0092 | 0.0010 | 0.0093 | 0.1075 | 0.0971 | -1.7273 | 0.9579 |
| SE2195 | SERP2206 | 2.330294 | 472.590  | 190.410 | 472.590  | 190.410 | 473.678  | 189.322 | 0    | 3    | 0.0000 | 0.0158 | 0.0000 | 0.0159 | 0.0000 | 0.0000 | -1.7283 | 0.9580 |
| SE0223 | SERP2357 | 2.330294 | 443.599  | 189.401 | 443.299  | 189.701 | 444.537  | 188.463 | 1    | 4    | 0.0023 | 0.0211 | 0.0023 | 0.0214 | 0.1075 | 0.0970 | -1.7297 | 0.9582 |
| SE2256 | SERP2286 | 2.330294 | 677.650  | 276.350 | 677.650  | 276.350 | 678.738  | 275.262 | 0    | 3    | 0.0000 | 0.0109 | 0.0000 | 0.0109 | 0.0000 | 0.0000 | -1.7302 | 0.9582 |
| SE0224 | SERP2356 | 2.330294 | 679.349  | 277.651 | 679.349  | 277.651 | 680.437  | 276.563 | 0    | 3    | 0.0000 | 0.0108 | 0.0000 | 0.0109 | 0.0000 | 0.0000 | -1.7302 | 0.9582 |
| SE1028 | SERP0917 | 2.330294 | 810.231  | 311.769 | 810.231  | 311.769 | 811.319  | 310.681 | 0    | 3    | 0.0000 | 0.0096 | 0.0000 | 0.0097 | 0.0000 | 0.0000 | -1.7321 | 0.9584 |
| SE2146 | SERP2157 | 2.330294 | 632.222  | 246.778 | 632.523  | 246.477 | 633.461  | 245.539 | 0    | 3    | 0.0000 | 0.0122 | 0.0000 | 0.0123 | 0.0000 | 0.0000 | -1.7324 | 0.9584 |
| SE0648 | SERP0540 | 2.330294 | 427.328  | 163.672 | 427.328  | 163.672 | 428.416  | 162.584 | 0    | 3    | 0.0000 | 0.0183 | 0.0000 | 0.0186 | 0.0000 | 0.0000 | -1.7383 | 0.9589 |
| SE2159 | SERP2169 | 2.330294 | 577.618  | 238.382 | 577.968  | 238.032 | 578.881  | 237.119 | 0    | 3    | 0.0000 | 0.0126 | 0.0000 | 0.0127 | 0.0000 | 0.0000 | -1.7397 | 0.9590 |
| SE0244 | SERP2337 | 2.330294 | 444.787  | 176.213 | 447.160  | 173.840 | 445.973  | 175.027 | 11.5 | 10.5 | 0.0258 | 0.0600 | 0.0262 | 0.0625 | 0.4192 | 0.2954 | -1.7484 | 0.9598 |
| SE2358 | SERP0059 | 2.330294 | 1078.651 | 442.349 | 1078.350 | 442.650 | 1079.589 | 441.411 | 1    | 4    | 0.0009 | 0.0090 | 0.0009 | 0.0091 | 0.0989 | 0.0900 | -1.7494 | 0.9599 |
| SE1428 | SERP1315 | 2.330294 | 899.309  | 360.691 | 899.009  | 360.991 | 900.247  | 359.753 | 0    | 3    | 0.0000 | 0.0083 | 0.0000 | 0.0084 | 0.0000 | 0.0000 | -1.7500 | 0.9599 |
| SE1580 | SERP1433 | 2.330294 | 759.431  | 308.569 | 759.581  | 308.419 | 760.594  | 307.406 | 1    | 4    | 0.0013 | 0.0130 | 0.0013 | 0.0131 | 0.0992 | 0.0903 | -1.7542 | 0.9603 |
| SE1271 | SERP1152 | 2.330294 | 1298.020 | 522.980 | 1298.020 | 522.980 | 1299.108 | 521.892 | 0    | 3    | 0.0000 | 0.0057 | 0.0000 | 0.0058 | 0.0000 | 0.0000 | -1.7576 | 0.9606 |
| SE0507 | SERP0390 | 2.330294 | 660.322  | 260.678 | 660.996  | 260.004 | 661.747  | 259.253 | 1    | 4    | 0.0015 | 0.0154 | 0.0015 | 0.0155 | 0.0968 | 0.0882 | -1.7626 | 0.9610 |
| SE0855 | SERP0745 | 2.330294 | 287.190  | 111.810 | 287.190  | 111.810 | 288.278  | 110.722 | 1    | 4    | 0.0035 | 0.0358 | 0.0035 | 0.0367 | 0.0954 | 0.0871 | -1.7633 | 0.9611 |
| SE2377 | SERP0039 | 2.330294 | 620.835  | 252.165 | 621.135  | 251.865 | 622.073  | 250.927 | 1    | 4    | 0.0016 | 0.0159 | 0.0016 | 0.0160 | 0.1000 | 0.0909 | -1.7650 | 0.9612 |
| SE1574 | SERP1427 | 2.330294 | 695.353  | 288.647 | 695.326  | 288.674 | 696.428  | 287.572 | 1    | 4    | 0.0014 | 0.0139 | 0.0014 | 0.0140 | 0.1000 | 0.0909 | -1.7650 | 0.9612 |
| SE0347 | SERP0221 | 2.330294 | 263.922  | 96.078  | 263.372  | 96.628  | 264.735  | 95.265  | 1    | 4    | 0.0038 | 0.0415 | 0.0038 | 0.0427 | 0.0890 | 0.0817 | -1.7658 | 0.9613 |
| SE1932 | SERP1944 | 2.330294 | 1412.551 | 561.449 | 1412.851 | 561.149 | 1413.789 | 560.211 | 1    | 4    | 0.0007 | 0.0071 | 0.0007 | 0.0072 | 0.0972 | 0.0886 | -1.7724 | 0.9618 |
| SE2095 | SERP2109 | 2.330294 | 697.993  | 280.007 | 695.593  | 282.407 | 697.881  | 280.119 | 1    | 4    | 0.0014 | 0.0142 | 0.0014 | 0.0144 | 0.0972 | 0.0886 | -1.7724 | 0.9618 |
| SE0717 | SERP0606 | 2.330294 | 848.632  | 324.368 | 848.233  | 324.767 | 849.521  | 323.479 | 1    | 4    | 0.0012 | 0.0123 | 0.0012 | 0.0124 | 0.0968 | 0.0882 | -1.7735 | 0.9619 |
| SE0684 | SERP0574 | 2.330294 | 1171.302 | 469.698 | 1170.452 | 470.548 | 1170.877 | 470.123 | 8    | 9    | 0.0068 | 0.0191 | 0.0069 | 0.0194 | 0.3557 | 0.2624 | -1.7760 | 0.9621 |
| SE2409 | SERP0012 | 2.330294 | 416.200  | 150.800 | 415.650  | 151.350 | 417.013  | 149.987 | 1    | 4    | 0.0024 | 0.0265 | 0.0024 | 0.0270 | 0.0889 | 0.0816 | -1.7813 | 0.9626 |
| SE1970 | SERP1982 | 2.330294 | 743.977  | 288.023 | 743.526  | 288.474 | 744.840  | 287.160 | 1    | 4    | 0.0013 | 0.0139 | 0.0013 | 0.0140 | 0.0929 | 0.0850 | -1.7838 | 0.9628 |
| SE1964 | SERP1976 | 2.330294 | 898.011  | 379.989 | 897.861  | 380.139 | 899.024  | 378.976 | 2    | 5    | 0.0022 | 0.0132 | 0.0022 | 0.0133 | 0.1654 | 0.1419 | -1.7875 | 0.9631 |
| SE1736 | SERP1745 | 2.330294 | 468.732  | 191.268 | 468.732  | 191.268 | 468.732  | 191.268 | 2    | 5    | 0.0043 | 0.0261 | 0.0043 | 0.0266 | 0.1617 | 0.1392 | -1.8028 | 0.9643 |
| SE0269 | SERP2308 | 2.330294 | 297.377  | 116.623 | 298.051  | 115.949 | 297.714  | 116.286 | 2    | 6    | 0.0067 | 0.0516 | 0.0067 | 0.0535 | 0.1252 | 0.1113 | -1.8036 | 0.9644 |
| SE0197 | SERP2379 | 2.330294 | 547.438  | 223.562 | 547.438  | 223.562 | 548.526  | 222.474 | 2    | 5    | 0.0037 | 0.0224 | 0.0037 | 0.0227 | 0.1630 | 0.1402 | -1.8050 | 0.9645 |
| SE0275 | SERP2302 | 2.330294 | 498.785  | 203.215 | 499.184  | 202.816 | 500.073  | 201.927 | 2    | 5    | 0.0040 | 0.0246 | 0.0040 | 0.0250 | 0.1600 | 0.1379 | -1.8190 | 0.9655 |
| SE0274 | SERP2303 | 2.330294 | 413.029  | 162.971 | 412.330  | 163.670 | 413.768  | 162.232 | 2    | 5    | 0.0048 | 0.0306 | 0.0049 | 0.0313 | 0.1565 | 0.1354 | -1.8202 | 0.9656 |
| SE0898 | SERP0789 | 2.330294 | 451.531  | 181.469 | 449.681  | 183.319 | 450.606  | 182.394 | 11   | 11   | 0.0244 | 0.0603 | 0.0248 | 0.0629 | 0.3943 | 0.2828 | -1.8203 | 0.9656 |
| SE0685 | SERP0575 | 2.330294 | 705.500  | 281.500 | 706.049  | 280.951 | 706.863  | 280.137 | 2    | 5    | 0.0028 | 0.0178 | 0.0028 | 0.0180 | 0.1556 | 0.1346 | -1.8218 | 0.9658 |
| SE2257 | SERP2287 | 2.330294 | 1114.242 | 433.758 | 1113.942 | 434.058 | 1115.180 | 432.820 | 2    | 5    | 0.0018 | 0.0115 | 0.0018 | 0.0116 | 0.1552 | 0.1343 | -1.8283 | 0.9663 |
| SE1064 | SERP0954 | 2.330294 | 244.435  | 91.565  | 244.135  | 91.865  | 245.374  | 90.626  | 2    | 5    | 0.0082 | 0.0545 | 0.0082 | 0.0566 | 0.1449 | 0.1265 | -1.8303 | 0.9664 |
| SE0271 | SERP2306 | 2.330294 | 431.381  | 180.619 | 430.708  | 181.292 | 432.133  | 179.867 | 3    | 6    | 0.0070 | 0.0332 | 0.0070 | 0.0339 | 0.2065 | 0.1711 | -1.8598 | 0.9685 |
| SE0018 | SERP2534 | 2.330294 | 496.580  | 202.420 | 496.881  | 202.119 | 496.730  | 202.270 | 0    | 5    | 0.0000 | 0.0247 | 0.0000 | 0.0251 | 0.0000 | 0.0000 | -1.8731 | 0.9695 |

|        |          |          |          |         |          |         |          |         |     |     |        |        |        |        |        |        |         |        |
|--------|----------|----------|----------|---------|----------|---------|----------|---------|-----|-----|--------|--------|--------|--------|--------|--------|---------|--------|
| SE1062 | SERP0952 | 2.330294 | 608.112  | 243.888 | 609.536  | 242.464 | 609.912  | 242.088 | 6   | 8   | 0.0099 | 0.0329 | 0.0099 | 0.0336 | 0.2946 | 0.2276 | -1.8736 | 0.9695 |
| SE0354 | SERP0232 | 2.330294 | 1054.592 | 433.408 | 1053.343 | 434.657 | 1055.056 | 432.944 | 3   | 6   | 0.0028 | 0.0138 | 0.0029 | 0.0140 | 0.2071 | 0.1716 | -1.8749 | 0.9696 |
| SE0019 | SERP2533 | 2.330294 | 1320.357 | 509.643 | 1320.357 | 509.643 | 1321.445 | 508.555 | 0   | 4   | 0.0000 | 0.0078 | 0.0000 | 0.0079 | 0.0000 | 0.0000 | -1.9750 | 0.9759 |
| SE2376 | SERP0040 | 2.330294 | 150.662  | 50.338  | 150.662  | 50.338  | 151.750  | 49.250  | 0   | 4   | 0.0000 | 0.0795 | 0.0000 | 0.0840 | 0.0000 | 0.0000 | -1.9765 | 0.9759 |
| SE0853 | SERP0743 | 2.330294 | 315.247  | 113.753 | 315.274  | 113.726 | 316.349  | 112.651 | 0   | 4   | 0.0000 | 0.0352 | 0.0000 | 0.0360 | 0.0000 | 0.0000 | -1.9780 | 0.9760 |
| SE0509 | SERP0392 | 2.330294 | 1071.681 | 431.319 | 1071.681 | 431.319 | 1072.769 | 430.231 | 0   | 4   | 0.0000 | 0.0093 | 0.0000 | 0.0093 | 0.0000 | 0.0000 | -1.9787 | 0.9761 |
| SE0215 | SERP2365 | 2.330294 | 535.419  | 217.581 | 534.869  | 218.131 | 536.232  | 216.768 | 0   | 4   | 0.0000 | 0.0184 | 0.0000 | 0.0186 | 0.0000 | 0.0000 | -1.9787 | 0.9761 |
| SE0890 | SERP0781 | 2.330294 | 347.001  | 138.999 | 347.001  | 138.999 | 348.089  | 137.911 | 0   | 4   | 0.0000 | 0.0288 | 0.0000 | 0.0293 | 0.0000 | 0.0000 | -1.9797 | 0.9761 |
| SE0217 | SERP2363 | 2.330294 | 949.437  | 406.563 | 949.737  | 406.263 | 950.675  | 405.325 | 0   | 4   | 0.0000 | 0.0098 | 0.0000 | 0.0099 | 0.0000 | 0.0000 | -1.9800 | 0.9761 |
| SE1207 | SERP1087 | 2.330294 | 973.430  | 382.570 | 973.129  | 382.871 | 974.368  | 381.632 | 0   | 4   | 0.0000 | 0.0105 | 0.0000 | 0.0105 | 0.0000 | 0.0000 | -1.9811 | 0.9762 |
| SE1803 | SERP1811 | 2.330294 | 913.196  | 376.804 | 913.196  | 376.804 | 914.284  | 375.716 | 0   | 4   | 0.0000 | 0.0106 | 0.0000 | 0.0107 | 0.0000 | 0.0000 | -1.9815 | 0.9762 |
| SE1458 | SERP1352 | 2.330294 | 841.294  | 355.706 | 840.794  | 356.206 | 842.133  | 354.867 | 0   | 4   | 0.0000 | 0.0112 | 0.0000 | 0.0113 | 0.0000 | 0.0000 | -1.9825 | 0.9763 |
| SE1950 | SERP1962 | 2.330294 | 703.338  | 286.662 | 703.364  | 286.636 | 704.439  | 285.561 | 0   | 4   | 0.0000 | 0.0140 | 0.0000 | 0.0141 | 0.0000 | 0.0000 | -1.9859 | 0.9765 |
| SE0053 | SERP2503 | 2.330294 | 220.013  | 88.987  | 220.039  | 88.961  | 220.026  | 88.974  | 2   | 7   | 0.0091 | 0.0787 | 0.0091 | 0.0831 | 0.1095 | 0.0987 | -1.9864 | 0.9765 |
| SE0633 | SERP0525 | 2.330294 | 173.270  | 69.730  | 173.570  | 69.430  | 174.508  | 68.492  | 0   | 4   | 0.0000 | 0.0575 | 0.0000 | 0.0598 | 0.0000 | 0.0000 | -1.9867 | 0.9765 |
| SE1019 | SERP0906 | 2.330294 | 705.834  | 269.166 | 705.834  | 269.166 | 706.922  | 268.078 | 0   | 4   | 0.0000 | 0.0149 | 0.0000 | 0.0150 | 0.0000 | 0.0000 | -2.0000 | 0.9772 |
| SE0364 | SERP0241 | 2.330294 | 240.900  | 98.100  | 240.250  | 98.750  | 241.663  | 97.337  | 1   | 5   | 0.0042 | 0.0508 | 0.0042 | 0.0526 | 0.0798 | 0.0739 | -2.0109 | 0.9778 |
| SE2175 | SERP2186 | 2.330294 | 827.903  | 348.097 | 827.903  | 348.097 | 828.991  | 347.009 | 1   | 5   | 0.0012 | 0.0144 | 0.0012 | 0.0145 | 0.0828 | 0.0764 | -2.0122 | 0.9779 |
| SE0840 | SERP0730 | 2.330294 | 437.127  | 174.873 | 436.977  | 175.023 | 438.140  | 173.860 | 1   | 5   | 0.0023 | 0.0286 | 0.0023 | 0.0291 | 0.0790 | 0.0732 | -2.0150 | 0.9780 |
| SE2157 | SERP2167 | 2.330294 | 664.426  | 256.574 | 662.026  | 258.974 | 664.314  | 256.686 | 10  | 11  | 0.0151 | 0.0427 | 0.0152 | 0.0439 | 0.3462 | 0.2572 | -2.0163 | 0.9781 |
| SE0326 | SERP0203 | 2.330294 | 444.034  | 170.966 | 444.034  | 170.966 | 445.122  | 169.878 | 1   | 5   | 0.0023 | 0.0292 | 0.0023 | 0.0298 | 0.0772 | 0.0717 | -2.0227 | 0.9784 |
| SE0222 | SERP2358 | 2.330294 | 848.873  | 336.127 | 849.246  | 335.754 | 850.148  | 334.852 | 1   | 5   | 0.0012 | 0.0149 | 0.0012 | 0.0150 | 0.0800 | 0.0741 | -2.0274 | 0.9787 |
| SE1743 | SERP1752 | 2.330294 | 677.717  | 258.283 | 677.717  | 258.283 | 678.805  | 257.195 | 1   | 5   | 0.0015 | 0.0194 | 0.0015 | 0.0196 | 0.0765 | 0.0711 | -2.0276 | 0.9787 |
| SE2088 | SERP2102 | 2.330294 | 617.758  | 261.242 | 618.308  | 260.692 | 619.121  | 259.879 | 2   | 6   | 0.0032 | 0.0230 | 0.0032 | 0.0234 | 0.1368 | 0.1203 | -2.0463 | 0.9796 |
| SE0366 | SERP0243 | 2.330294 | 298.002  | 121.998 | 298.079  | 121.921 | 299.128  | 120.872 | 2   | 6   | 0.0067 | 0.0492 | 0.0067 | 0.0509 | 0.1316 | 0.1163 | -2.0518 | 0.9799 |
| SE0850 | SERP0740 | 2.330294 | 494.391  | 189.609 | 495.190  | 188.810 | 495.879  | 188.121 | 10  | 11  | 0.0202 | 0.0581 | 0.0205 | 0.0605 | 0.3388 | 0.2531 | -2.0533 | 0.9800 |
| SE1441 | SERP1328 | 2.330294 | 740.822  | 300.178 | 739.672  | 301.328 | 741.335  | 299.665 | 2   | 6   | 0.0027 | 0.0199 | 0.0027 | 0.0202 | 0.1337 | 0.1179 | -2.0553 | 0.9801 |
| SE0368 | SERP0250 | 2.330294 | 335.519  | 138.481 | 335.342  | 138.658 | 336.519  | 137.481 | 2   | 6   | 0.0060 | 0.0433 | 0.0060 | 0.0446 | 0.1345 | 0.1186 | -2.0558 | 0.9801 |
| SE1376 | SERP1264 | 2.330294 | 615.066  | 239.934 | 615.066  | 239.934 | 616.154  | 238.846 | 2   | 6   | 0.0033 | 0.0250 | 0.0033 | 0.0254 | 0.1299 | 0.1150 | -2.0560 | 0.9801 |
| SE1088 | SERP0975 | 2.330294 | 442.615  | 181.385 | 443.092  | 180.908 | 443.941  | 180.059 | 2   | 6   | 0.0045 | 0.0331 | 0.0045 | 0.0339 | 0.1327 | 0.1172 | -2.0612 | 0.9804 |
| SE2011 | SERP2024 | 2.330294 | 1258.284 | 514.716 | 1258.761 | 514.239 | 1259.611 | 513.389 | 2   | 6   | 0.0016 | 0.0117 | 0.0016 | 0.0118 | 0.1356 | 0.1194 | -2.0713 | 0.9808 |
| SE1273 | SERP1154 | 2.330294 | 692.255  | 279.745 | 692.255  | 279.745 | 693.343  | 278.657 | 2   | 6   | 0.0029 | 0.0214 | 0.0029 | 0.0218 | 0.1330 | 0.1174 | -2.0719 | 0.9809 |
| SE1785 | SERP1793 | 2.330294 | 662.271  | 267.729 | 663.195  | 266.805 | 663.821  | 266.179 | 2   | 6   | 0.0030 | 0.0224 | 0.0030 | 0.0228 | 0.1316 | 0.1163 | -2.0767 | 0.9811 |
| SE2093 | SERP2107 | 2.330294 | 824.899  | 330.101 | 824.350  | 330.650 | 825.713  | 329.287 | 2   | 6   | 0.0024 | 0.0182 | 0.0024 | 0.0184 | 0.1304 | 0.1154 | -2.0806 | 0.9813 |
| SE0694 | SERP0585 | 2.330294 | 249.220  | 95.780  | 247.420  | 97.580  | 248.320  | 96.680  | 1.5 | 5.5 | 0.0060 | 0.0569 | 0.0061 | 0.0592 | 0.1030 | 0.0934 | -2.0871 | 0.9816 |
| SE0140 | SERP2425 | 2.330294 | 625.789  | 256.211 | 627.339  | 254.661 | 626.564  | 255.436 | 3   | 7   | 0.0048 | 0.0274 | 0.0048 | 0.0279 | 0.1720 | 0.1468 | -2.1070 | 0.9824 |
| SE0500 | SERP0383 | 2.330294 | 1343.284 | 537.716 | 1344.384 | 536.616 | 1344.922 | 536.078 | 3   | 7   | 0.0022 | 0.0130 | 0.0022 | 0.0131 | 0.1679 | 0.1438 | -2.1099 | 0.9826 |
| SE1989 | SERP2001 | 2.330294 | 894.292  | 350.708 | 894.292  | 350.708 | 895.380  | 349.620 | 3   | 7   | 0.0034 | 0.0200 | 0.0034 | 0.0202 | 0.1683 | 0.1441 | -2.1183 | 0.9829 |
| SE0276 | SERP2301 | 2.330294 | 536.640  | 219.360 | 536.190  | 219.810 | 537.503  | 218.497 | 3   | 7   | 0.0056 | 0.0319 | 0.0056 | 0.0326 | 0.1718 | 0.1466 | -2.1244 | 0.9832 |

|        |          |          |          |         |          |         |          |         |      |      |        |        |        |        |        |        |         |        |
|--------|----------|----------|----------|---------|----------|---------|----------|---------|------|------|--------|--------|--------|--------|--------|--------|---------|--------|
| SE1379 | SERP1267 | 2.330294 | 672.472  | 263.528 | 672.996  | 263.004 | 673.822  | 262.178 | 3    | 7    | 0.0045 | 0.0266 | 0.0045 | 0.0271 | 0.1661 | 0.1424 | -2.1274 | 0.9833 |
| SE1059 | SERP0948 | 2.330294 | 547.066  | 214.934 | 545.192  | 216.808 | 546.129  | 215.871 | 11.5 | 13.5 | 0.0211 | 0.0625 | 0.0214 | 0.0653 | 0.3277 | 0.2468 | -2.1657 | 0.9848 |
| SE0693 | SERP0583 | 2.330294 | 422.583  | 165.417 | 422.210  | 165.790 | 423.485  | 164.515 | 12   | 13   | 0.0284 | 0.0785 | 0.0290 | 0.0829 | 0.3498 | 0.2592 | -2.1738 | 0.9851 |
| SE2378 | SERP0038 | 2.330294 | 597.716  | 242.284 | 598.265  | 241.735 | 599.079  | 240.921 | 4    | 8    | 0.0067 | 0.0331 | 0.0067 | 0.0338 | 0.1982 | 0.1654 | -2.1775 | 0.9853 |
| SE1377 | SERP1265 | 2.330294 | 880.373  | 346.627 | 880.223  | 346.777 | 881.386  | 345.614 | 4    | 8    | 0.0045 | 0.0231 | 0.0046 | 0.0234 | 0.1966 | 0.1643 | -2.1828 | 0.9855 |
| SE1061 | SERP0951 | 2.330294 | 557.118  | 216.882 | 557.641  | 216.359 | 558.468  | 215.532 | 7    | 10   | 0.0126 | 0.0462 | 0.0127 | 0.0476 | 0.2668 | 0.2106 | -2.1895 | 0.9857 |
| SE2375 | SERP0041 | 2.330294 | 782.028  | 312.972 | 782.028  | 312.972 | 783.116  | 311.884 | 0    | 5    | 0.0000 | 0.0160 | 0.0000 | 0.0161 | 0.0000 | 0.0000 | -2.2055 | 0.9863 |
| SE2353 | SERP0064 | 2.330294 | 645.453  | 254.547 | 645.453  | 254.547 | 646.541  | 253.459 | 0    | 5    | 0.0000 | 0.0196 | 0.0000 | 0.0199 | 0.0000 | 0.0000 | -2.2111 | 0.9865 |
| SE2083 | SERP2098 | 2.330294 | 558.674  | 224.326 | 558.674  | 224.326 | 559.762  | 223.238 | 0    | 5    | 0.0000 | 0.0223 | 0.0000 | 0.0226 | 0.0000 | 0.0000 | -2.2157 | 0.9866 |
| SE2255 | SERP2285 | 2.330294 | 546.259  | 224.741 | 546.259  | 224.741 | 547.347  | 223.653 | 0    | 5    | 0.0000 | 0.0222 | 0.0000 | 0.0226 | 0.0000 | 0.0000 | -2.2157 | 0.9866 |
| SE2076 | SERP2089 | 2.330294 | 440.377  | 168.623 | 440.377  | 168.623 | 441.465  | 167.535 | 0    | 5    | 0.0000 | 0.0297 | 0.0000 | 0.0303 | 0.0000 | 0.0000 | -2.2279 | 0.9871 |
| SE2259 | SERP2289 | 2.330294 | 827.178  | 345.822 | 826.628  | 346.372 | 827.991  | 345.009 | 1    | 6    | 0.0012 | 0.0173 | 0.0012 | 0.0175 | 0.0686 | 0.0642 | -2.2331 | 0.9872 |
| SE1945 | SERP1957 | 2.330294 | 1111.079 | 487.921 | 1111.079 | 487.921 | 1112.167 | 486.833 | 0    | 5    | 0.0000 | 0.0102 | 0.0000 | 0.0103 | 0.0000 | 0.0000 | -2.2391 | 0.9874 |
| SE0876 | SERP0766 | 2.330294 | 628.292  | 250.708 | 628.292  | 250.708 | 629.381  | 249.619 | 1    | 6    | 0.0016 | 0.0239 | 0.0016 | 0.0243 | 0.0658 | 0.0618 | -2.2415 | 0.9875 |
| SE0541 | SERP0426 | 2.330294 | 1418.560 | 564.440 | 1418.710 | 564.290 | 1419.723 | 563.277 | 1    | 6    | 0.0007 | 0.0106 | 0.0007 | 0.0107 | 0.0654 | 0.0614 | -2.2445 | 0.9876 |
| SE1373 | SERP1261 | 2.330294 | 1246.574 | 508.426 | 1246.574 | 508.426 | 1247.662 | 507.338 | 0    | 5    | 0.0000 | 0.0098 | 0.0000 | 0.0099 | 0.0000 | 0.0000 | -2.2500 | 0.9878 |
| SE1878 | SERP1887 | 2.330294 | 220.338  | 94.662  | 220.215  | 94.785  | 221.365  | 93.635  | 1    | 6    | 0.0045 | 0.0633 | 0.0046 | 0.0662 | 0.0695 | 0.0650 | -2.2504 | 0.9878 |
| SE1549 | SERP1402 | 2.330294 | 775.690  | 316.310 | 775.690  | 316.310 | 776.779  | 315.221 | 0    | 5    | 0.0000 | 0.0158 | 0.0000 | 0.0160 | 0.0000 | 0.0000 | -2.2535 | 0.9879 |
| SE0994 | SERP0882 | 2.330294 | 490.410  | 190.590 | 489.959  | 191.041 | 491.273  | 189.727 | 8    | 11   | 0.0163 | 0.0576 | 0.0165 | 0.0600 | 0.2750 | 0.2157 | -2.2548 | 0.9879 |
| SE1096 | SERP0985 | 2.330294 | 905.211  | 354.789 | 905.211  | 354.789 | 905.211  | 354.789 | 1    | 6    | 0.0011 | 0.0169 | 0.0011 | 0.0171 | 0.0643 | 0.0604 | -2.2580 | 0.9880 |
| SE0001 | SERP2553 | 2.330294 | 972.286  | 380.714 | 972.835  | 380.165 | 973.649  | 379.351 | 1    | 6    | 0.0010 | 0.0158 | 0.0010 | 0.0159 | 0.0629 | 0.0592 | -2.2657 | 0.9883 |
| SE1969 | SERP1981 | 2.330294 | 462.585  | 191.415 | 463.585  | 190.415 | 464.173  | 189.827 | 2    | 7    | 0.0043 | 0.0367 | 0.0043 | 0.0376 | 0.1144 | 0.1026 | -2.2758 | 0.9886 |
| SE1793 | SERP1801 | 2.330294 | 575.406  | 228.594 | 575.105  | 228.895 | 576.344  | 227.656 | 2    | 7    | 0.0035 | 0.0306 | 0.0035 | 0.0312 | 0.1122 | 0.1009 | -2.2780 | 0.9886 |
| SE0227 | SERP2353 | 2.330294 | 1110.237 | 452.763 | 1110.387 | 452.613 | 1111.400 | 451.600 | 2    | 7    | 0.0018 | 0.0155 | 0.0018 | 0.0156 | 0.1154 | 0.1034 | -2.2842 | 0.9888 |
| SE2197 | SERP2208 | 2.330294 | 1057.870 | 409.130 | 1057.170 | 409.830 | 1058.608 | 408.392 | 2    | 7    | 0.0019 | 0.0171 | 0.0019 | 0.0173 | 0.1098 | 0.0990 | -2.2893 | 0.9890 |
| SE1999 | SERP2012 | 2.330294 | 818.626  | 330.374 | 818.352  | 330.648 | 819.577  | 329.423 | 6    | 10   | 0.0073 | 0.0303 | 0.0074 | 0.0309 | 0.2395 | 0.1932 | -2.2929 | 0.9891 |
| SE2252 | SERP2282 | 2.330294 | 941.876  | 357.124 | 942.176  | 356.824 | 943.114  | 355.886 | 2    | 7    | 0.0021 | 0.0196 | 0.0021 | 0.0199 | 0.1055 | 0.0955 | -2.2978 | 0.9892 |
| SE1079 | SERP0969 | 2.330294 | 776.619  | 294.381 | 776.619  | 294.381 | 777.707  | 293.293 | 2    | 7    | 0.0026 | 0.0238 | 0.0026 | 0.0242 | 0.1074 | 0.0970 | -2.3041 | 0.9894 |
| SE0343 | SERP0218 | 2.330294 | 461.343  | 183.657 | 461.793  | 183.207 | 461.568  | 183.432 | 11.5 | 13.5 | 0.0249 | 0.0736 | 0.0253 | 0.0775 | 0.3265 | 0.2461 | -2.3178 | 0.9898 |
| SE1948 | SERP1960 | 2.330294 | 1548.653 | 614.347 | 1548.352 | 614.648 | 1549.591 | 613.409 | 2    | 7    | 0.0013 | 0.0114 | 0.0013 | 0.0115 | 0.1130 | 0.1016 | -2.3218 | 0.9899 |
| SE0185 | SERP2388 | 2.330294 | 1386.777 | 542.223 | 1384.678 | 544.322 | 1385.727 | 543.273 | 16.5 | 16.5 | 0.0119 | 0.0304 | 0.0120 | 0.0310 | 0.3871 | 0.2791 | -2.3254 | 0.9900 |
| SE1873 | SERP1881 | 2.330294 | 999.155  | 395.845 | 999.755  | 395.245 | 1000.543 | 394.457 | 3    | 8    | 0.0030 | 0.0202 | 0.0030 | 0.0205 | 0.1463 | 0.1277 | -2.3348 | 0.9902 |
| SE0894 | SERP0785 | 2.330294 | 531.337  | 209.663 | 530.337  | 210.663 | 531.925  | 209.075 | 3    | 8    | 0.0057 | 0.0381 | 0.0057 | 0.0391 | 0.1458 | 0.1272 | -2.3539 | 0.9907 |
| SE0340 | SERP0215 | 2.330294 | 515.441  | 213.559 | 515.392  | 213.608 | 515.416  | 213.584 | 17   | 18   | 0.0330 | 0.0843 | 0.0337 | 0.0894 | 0.3770 | 0.2738 | -2.3605 | 0.9909 |
| SE0845 | SERP0735 | 2.330294 | 363.278  | 143.722 | 363.479  | 143.521 | 363.379  | 143.621 | 7    | 11   | 0.0193 | 0.0766 | 0.0195 | 0.0808 | 0.2413 | 0.1944 | -2.3800 | 0.9913 |
| SE1940 | SERP1952 | 2.330294 | 764.572  | 285.428 | 764.572  | 285.428 | 765.661  | 284.339 | 3    | 8    | 0.0039 | 0.0280 | 0.0039 | 0.0286 | 0.1364 | 0.1200 | -2.3845 | 0.9914 |
| SE0889 | SERP0780 | 2.330294 | 141.011  | 59.989  | 140.711  | 60.289  | 141.949  | 59.051  | 0    | 6    | 0.0000 | 0.0998 | 0.0000 | 0.1071 | 0.0000 | 0.0000 | -2.3853 | 0.9915 |
| SE0619 | SERP0513 | 2.330294 | 192.987  | 71.013  | 192.438  | 71.562  | 193.801  | 70.199  | 0    | 6    | 0.0000 | 0.0842 | 0.0000 | 0.0893 | 0.0000 | 0.0000 | -2.3941 | 0.9917 |
| SE1006 | SERP0893 | 2.330294 | 627.944  | 242.056 | 628.868  | 241.132 | 629.494  | 240.506 | 4    | 9    | 0.0064 | 0.0373 | 0.0064 | 0.0382 | 0.1675 | 0.1435 | -2.4102 | 0.9920 |

|        |          |          |          |         |          |         |          |         |     |      |        |        |        |        |        |        |         |        |
|--------|----------|----------|----------|---------|----------|---------|----------|---------|-----|------|--------|--------|--------|--------|--------|--------|---------|--------|
| SE0688 | SERP0578 | 2.330294 | 528.562  | 191.438 | 528.012  | 191.988 | 529.375  | 190.625 | 0   | 6    | 0.0000 | 0.0313 | 0.0000 | 0.0320 | 0.0000 | 0.0000 | -2.4242 | 0.9923 |
| SE2348 | SERP0069 | 2.330294 | 1033.413 | 430.587 | 1033.413 | 430.587 | 1034.502 | 429.498 | 0   | 6    | 0.0000 | 0.0139 | 0.0000 | 0.0141 | 0.0000 | 0.0000 | -2.4310 | 0.9925 |
| SE0678 | SERP0568 | 2.330294 | 881.220  | 360.780 | 881.844  | 360.156 | 882.620  | 359.380 | 0   | 6    | 0.0000 | 0.0166 | 0.0000 | 0.0168 | 0.0000 | 0.0000 | -2.4348 | 0.9925 |
| SE0922 | SERP0812 | 2.330294 | 548.188  | 219.812 | 548.162  | 219.838 | 549.263  | 218.737 | 0   | 6    | 0.0000 | 0.0273 | 0.0000 | 0.0278 | 0.0000 | 0.0000 | -2.4386 | 0.9926 |
| SE0319 | SERP0196 | 2.330294 | 512.281  | 201.719 | 513.932  | 200.068 | 514.194  | 199.806 | 5   | 10   | 0.0097 | 0.0498 | 0.0098 | 0.0515 | 0.1903 | 0.1599 | -2.4419 | 0.9927 |
| SE2248 | SERP2280 | 2.330294 | 852.007  | 344.993 | 852.557  | 344.443 | 853.370  | 343.630 | 0   | 6    | 0.0000 | 0.0174 | 0.0000 | 0.0176 | 0.0000 | 0.0000 | -2.4444 | 0.9927 |
| SE1053 | SERP0942 | 2.330294 | 857.427  | 348.573 | 857.127  | 348.873 | 858.365  | 347.635 | 0   | 6    | 0.0000 | 0.0172 | 0.0000 | 0.0174 | 0.0000 | 0.0000 | -2.4507 | 0.9929 |
| SE1181 | SERP1060 | 2.330294 | 630.056  | 254.944 | 629.206  | 255.794 | 630.719  | 254.281 | 1   | 7    | 0.0016 | 0.0274 | 0.0016 | 0.0279 | 0.0573 | 0.0542 | -2.4533 | 0.9929 |
| SE1100 | SERP0989 | 2.330294 | 465.478  | 191.522 | 466.727  | 190.273 | 466.102  | 190.898 | 1   | 7    | 0.0021 | 0.0367 | 0.0021 | 0.0376 | 0.0559 | 0.0529 | -2.4562 | 0.9930 |
| SE0252 | SERP2328 | 2.330294 | 1004.555 | 411.445 | 1004.306 | 411.694 | 1005.519 | 410.481 | 1   | 7    | 0.0010 | 0.0170 | 0.0010 | 0.0172 | 0.0581 | 0.0549 | -2.4633 | 0.9931 |
| SE0387 | SERP0270 | 2.330294 | 361.272  | 145.728 | 361.272  | 145.728 | 361.272  | 145.728 | 2   | 8    | 0.0055 | 0.0549 | 0.0056 | 0.0570 | 0.0982 | 0.0895 | -2.4748 | 0.9933 |
| SE1946 | SERP1958 | 2.330294 | 1199.885 | 477.115 | 1199.735 | 477.265 | 1200.898 | 476.102 | 1   | 7    | 0.0008 | 0.0147 | 0.0008 | 0.0148 | 0.0541 | 0.0513 | -2.4749 | 0.9933 |
| SE1735 | SERP1744 | 2.330294 | 927.478  | 371.522 | 928.478  | 370.522 | 929.066  | 369.934 | 2   | 8    | 0.0022 | 0.0216 | 0.0022 | 0.0219 | 0.1005 | 0.0913 | -2.4802 | 0.9934 |
| SE1939 | SERP1951 | 2.330294 | 473.880  | 192.120 | 474.580  | 191.420 | 475.318  | 190.682 | 2   | 8    | 0.0042 | 0.0417 | 0.0042 | 0.0429 | 0.0979 | 0.0892 | -2.4821 | 0.9935 |
| SE0327 | SERP0204 | 2.330294 | 361.756  | 142.244 | 361.305  | 142.695 | 362.619  | 141.381 | 2   | 8    | 0.0055 | 0.0562 | 0.0056 | 0.0584 | 0.0959 | 0.0875 | -2.4834 | 0.9935 |
| SE2158 | SERP2168 | 2.330294 | 1071.776 | 425.224 | 1072.077 | 424.923 | 1073.015 | 423.985 | 2   | 8    | 0.0019 | 0.0188 | 0.0019 | 0.0191 | 0.0995 | 0.0905 | -2.4844 | 0.9935 |
| SE0636 | SERP0528 | 2.330294 | 1051.270 | 427.730 | 1052.120 | 426.880 | 1051.695 | 427.305 | 9.5 | 13.5 | 0.0090 | 0.0316 | 0.0091 | 0.0323 | 0.2817 | 0.2198 | -2.4866 | 0.9936 |
| SE1731 | SERP1740 | 2.330294 | 835.475  | 346.525 | 835.802  | 346.198 | 836.727  | 345.273 | 2   | 8    | 0.0024 | 0.0231 | 0.0024 | 0.0235 | 0.1021 | 0.0927 | -2.4905 | 0.9936 |
| SE0262 | SERP2316 | 2.330294 | 688.380  | 271.620 | 689.681  | 270.319 | 690.119  | 269.881 | 2   | 8    | 0.0029 | 0.0295 | 0.0029 | 0.0301 | 0.0963 | 0.0879 | -2.4945 | 0.9937 |
| SE0342 | SERP0217 | 2.330294 | 385.601  | 160.399 | 386.052  | 159.948 | 385.827  | 160.173 | 7   | 12   | 0.0181 | 0.0749 | 0.0184 | 0.0789 | 0.2332 | 0.1891 | -2.4996 | 0.9938 |
| SE0630 | SERP0522 | 2.330294 | 169.789  | 70.211  | 168.990  | 71.010  | 170.478  | 69.522  | 0   | 7    | 0.0000 | 0.0991 | 0.0000 | 0.1063 | 0.0000 | 0.0000 | -2.5492 | 0.9946 |
| SE0277 | SERP2300 | 2.330294 | 455.112  | 177.888 | 456.212  | 176.788 | 455.662  | 177.338 | 4   | 10   | 0.0088 | 0.0564 | 0.0088 | 0.0586 | 0.1502 | 0.1306 | -2.5712 | 0.9949 |
| SE1009 | SERP0897 | 2.330294 | 906.760  | 371.240 | 907.309  | 370.691 | 908.123  | 369.877 | 4   | 10   | 0.0044 | 0.0270 | 0.0044 | 0.0275 | 0.1600 | 0.1379 | -2.5741 | 0.9950 |
| SE0382 | SERP0264 | 2.330294 | 542.773  | 207.227 | 541.923  | 208.077 | 542.348  | 207.652 | 9.5 | 13.5 | 0.0175 | 0.0650 | 0.0177 | 0.0680 | 0.2603 | 0.2065 | -2.5777 | 0.9950 |
| SE1875 | SERP1883 | 2.330294 | 347.355  | 144.645 | 349.454  | 142.546 | 349.493  | 142.507 | 8   | 13   | 0.0230 | 0.0905 | 0.0233 | 0.0965 | 0.2415 | 0.1945 | -2.5853 | 0.9951 |
| SE1267 | SERP1148 | 2.330294 | 1293.667 | 533.333 | 1293.367 | 533.633 | 1293.517 | 533.483 | 1   | 8    | 0.0008 | 0.0150 | 0.0008 | 0.0151 | 0.0530 | 0.0503 | -2.6196 | 0.9956 |
| SE0873 | SERP0764 | 2.330294 | 368.594  | 156.406 | 368.567  | 156.433 | 368.581  | 156.419 | 3   | 10   | 0.0081 | 0.0639 | 0.0082 | 0.0668 | 0.1228 | 0.1093 | -2.6221 | 0.9956 |
| SE0004 | SERP2549 | 2.330294 | 1368.051 | 560.949 | 1368.401 | 560.599 | 1369.314 | 559.686 | 0   | 7    | 0.0000 | 0.0125 | 0.0000 | 0.0126 | 0.0000 | 0.0000 | -2.6250 | 0.9957 |
| SE2193 | SERP2204 | 2.330294 | 535.811  | 211.189 | 535.811  | 211.189 | 536.899  | 210.101 | 0   | 7    | 0.0000 | 0.0331 | 0.0000 | 0.0339 | 0.0000 | 0.0000 | -2.6279 | 0.9957 |
| SE0817 | SERP0708 | 2.330294 | 750.975  | 299.025 | 750.625  | 299.375 | 751.888  | 298.112 | 1   | 8    | 0.0013 | 0.0267 | 0.0013 | 0.0272 | 0.0478 | 0.0456 | -2.6464 | 0.9959 |
| SE0180 | SERP2395 | 2.330294 | 962.651  | 390.349 | 963.451  | 389.549 | 964.139  | 388.861 | 2   | 9    | 0.0021 | 0.0231 | 0.0021 | 0.0234 | 0.0897 | 0.0824 | -2.6489 | 0.9960 |
| SE0803 | SERP0692 | 2.330294 | 959.289  | 399.711 | 960.538  | 398.462 | 961.001  | 397.999 | 2   | 9    | 0.0021 | 0.0226 | 0.0021 | 0.0229 | 0.0917 | 0.0840 | -2.6515 | 0.9960 |
| SE1874 | SERP1882 | 2.330294 | 757.178  | 310.822 | 757.002  | 310.998 | 758.178  | 309.822 | 1   | 8    | 0.0013 | 0.0257 | 0.0013 | 0.0262 | 0.0496 | 0.0473 | -2.6516 | 0.9960 |
| SE0908 | SERP0799 | 2.330294 | 522.664  | 212.336 | 522.664  | 212.336 | 523.752  | 211.248 | 2   | 9    | 0.0038 | 0.0424 | 0.0038 | 0.0436 | 0.0872 | 0.0802 | -2.6629 | 0.9961 |
| SE2416 | SERP0004 | 2.330294 | 1322.930 | 552.070 | 1322.630 | 552.370 | 1323.868 | 551.132 | 0   | 7    | 0.0000 | 0.0127 | 0.0000 | 0.0128 | 0.0000 | 0.0000 | -2.6667 | 0.9962 |
| SE0635 | SERP0527 | 2.330294 | 851.740  | 354.260 | 852.191  | 353.809 | 853.054  | 352.946 | 3   | 10   | 0.0035 | 0.0282 | 0.0035 | 0.0288 | 0.1215 | 0.1084 | -2.6872 | 0.9964 |
| SE0863 | SERP0753 | 2.330294 | 480.179  | 185.821 | 480.053  | 185.947 | 481.204  | 184.796 | 6   | 12   | 0.0125 | 0.0646 | 0.0126 | 0.0675 | 0.1867 | 0.1573 | -2.6979 | 0.9965 |
| SE0844 | SERP0734 | 2.330294 | 417.508  | 167.492 | 417.258  | 167.742 | 418.471  | 166.529 | 3   | 10   | 0.0072 | 0.0597 | 0.0072 | 0.0622 | 0.1158 | 0.1037 | -2.7042 | 0.9966 |
| SE1880 | SERP1889 | 2.330294 | 801.624  | 320.376 | 799.975  | 322.025 | 801.888  | 320.112 | 3   | 10   | 0.0037 | 0.0311 | 0.0038 | 0.0318 | 0.1195 | 0.1067 | -2.7088 | 0.9966 |

|        |          |          |          |         |          |         |          |         |      |      |        |        |        |        |        |        |         |        |
|--------|----------|----------|----------|---------|----------|---------|----------|---------|------|------|--------|--------|--------|--------|--------|--------|---------|--------|
| SE0565 | SERP0450 | 2.330294 | 1709.106 | 666.894 | 1708.256 | 667.744 | 1709.769 | 666.231 | 3    | 10   | 0.0018 | 0.0150 | 0.0018 | 0.0151 | 0.1192 | 0.1065 | -2.7126 | 0.9967 |
| SE0322 | SERP0199 | 2.330294 | 498.305  | 194.695 | 498.803  | 194.197 | 499.642  | 193.358 | 7    | 13   | 0.0140 | 0.0669 | 0.0142 | 0.0700 | 0.2029 | 0.1686 | -2.7223 | 0.9968 |
| SE0878 | SERP0768 | 2.330294 | 779.065  | 318.935 | 777.941  | 320.059 | 779.591  | 318.409 | 4    | 11   | 0.0051 | 0.0344 | 0.0052 | 0.0352 | 0.1477 | 0.1287 | -2.7245 | 0.9968 |
| SE2187 | SERP2198 | 2.330294 | 901.386  | 352.614 | 901.386  | 352.614 | 902.474  | 351.526 | 3    | 10   | 0.0033 | 0.0284 | 0.0033 | 0.0289 | 0.1142 | 0.1025 | -2.7251 | 0.9968 |
| SE0881 | SERP0771 | 2.330294 | 432.502  | 176.498 | 431.652  | 177.348 | 432.077  | 176.923 | 3.5  | 10.5 | 0.0081 | 0.0593 | 0.0081 | 0.0618 | 0.1311 | 0.1159 | -2.7267 | 0.9968 |
| SE0869 | SERP0760 | 2.330294 | 567.112  | 227.888 | 566.511  | 228.489 | 567.900  | 227.100 | 3    | 10   | 0.0053 | 0.0438 | 0.0053 | 0.0452 | 0.1173 | 0.1050 | -2.7269 | 0.9968 |
| SE0372 | SERP0254 | 2.330294 | 547.562  | 226.438 | 546.163  | 227.837 | 547.951  | 226.049 | 4    | 11   | 0.0073 | 0.0484 | 0.0074 | 0.0501 | 0.1477 | 0.1287 | -2.7295 | 0.9968 |
| SE0914 | SERP0805 | 2.330294 | 363.650  | 137.350 | 362.350  | 138.650 | 364.088  | 136.912 | 4    | 11   | 0.0110 | 0.0797 | 0.0111 | 0.0843 | 0.1317 | 0.1164 | -2.7443 | 0.9970 |
| SE0851 | SERP0741 | 2.330294 | 313.318  | 124.682 | 316.120  | 121.880 | 314.719  | 123.281 | 4    | 11   | 0.0127 | 0.0892 | 0.0128 | 0.0950 | 0.1347 | 0.1187 | -2.7862 | 0.9973 |
| SE0055 | SERP2501 | 2.330294 | 246.518  | 101.482 | 248.094  | 99.906  | 247.306  | 100.694 | 15   | 19   | 0.0607 | 0.1887 | 0.0632 | 0.2174 | 0.2907 | 0.2252 | -2.7976 | 0.9974 |
| SE0885 | SERP0776 | 2.330294 | 444.122  | 176.878 | 444.848  | 176.152 | 445.573  | 175.427 | 1    | 9    | 0.0022 | 0.0510 | 0.0023 | 0.0528 | 0.0436 | 0.0417 | -2.7982 | 0.9974 |
| SE1511 | SERP1366 | 2.330294 | 1034.286 | 411.714 | 1035.986 | 410.014 | 1036.224 | 409.776 | 1    | 9    | 0.0010 | 0.0219 | 0.0010 | 0.0222 | 0.0450 | 0.0431 | -2.8019 | 0.9975 |
| SE2162 | SERP2173 | 2.330294 | 320.042  | 123.958 | 319.692  | 124.308 | 319.867  | 124.133 | 5    | 12   | 0.0156 | 0.0967 | 0.0158 | 0.1035 | 0.1527 | 0.1324 | -2.8025 | 0.9975 |
| SE2148 | SERP2159 | 2.330294 | 949.209  | 385.791 | 950.209  | 384.791 | 950.797  | 384.203 | 6    | 13   | 0.0063 | 0.0337 | 0.0063 | 0.0345 | 0.1826 | 0.1544 | -2.8081 | 0.9975 |
| SE1867 | SERP1875 | 2.330294 | 597.010  | 236.990 | 597.183  | 236.817 | 598.184  | 235.816 | 5    | 12   | 0.0084 | 0.0507 | 0.0084 | 0.0524 | 0.1603 | 0.1382 | -2.8126 | 0.9975 |
| SE0883 | SERP0774 | 2.330294 | 295.644  | 109.356 | 295.344  | 109.656 | 296.582  | 108.418 | 1    | 9    | 0.0034 | 0.0822 | 0.0034 | 0.0870 | 0.0391 | 0.0376 | -2.8342 | 0.9977 |
| SE1879 | SERP1888 | 2.330294 | 674.812  | 276.188 | 674.662  | 276.338 | 675.825  | 275.175 | 2    | 10   | 0.0030 | 0.0362 | 0.0030 | 0.0371 | 0.0809 | 0.0748 | -2.8451 | 0.9978 |
| SE0383 | SERP0266 | 2.330294 | 637.973  | 247.027 | 637.496  | 247.504 | 638.822  | 246.178 | 6    | 13   | 0.0094 | 0.0526 | 0.0095 | 0.0545 | 0.1743 | 0.1484 | -2.8545 | 0.9978 |
| SE2005 | SERP2018 | 2.330294 | 1278.171 | 548.829 | 1278.871 | 548.129 | 1279.609 | 547.391 | 2    | 10   | 0.0016 | 0.0182 | 0.0016 | 0.0185 | 0.0865 | 0.0796 | -2.8628 | 0.9979 |
| SE1041 | SERP0930 | 2.330294 | 1779.359 | 740.641 | 1778.536 | 741.464 | 1780.036 | 739.964 | 3    | 11   | 0.0017 | 0.0148 | 0.0017 | 0.0150 | 0.1133 | 0.1018 | -2.8852 | 0.9980 |
| SE0029 | SERP2468 | 2.330294 | 158.937  | 60.063  | 160.665  | 58.335  | 160.801  | 58.199  | 20.6 | 22.4 | 0.1288 | 0.3787 | 0.1413 | 0.5272 | 0.2680 | 0.2114 | -2.8918 | 0.9981 |
| SE0997 | SERP0885 | 2.330294 | 1050.045 | 419.955 | 1050.144 | 419.856 | 1050.095 | 419.905 | 4    | 12   | 0.0038 | 0.0286 | 0.0038 | 0.0291 | 0.1306 | 0.1155 | -2.9048 | 0.9982 |
| SE1094 | SERP0981 | 2.330294 | 575.686  | 231.314 | 576.286  | 230.714 | 575.986  | 231.014 | 4    | 12   | 0.0069 | 0.0519 | 0.0070 | 0.0538 | 0.1301 | 0.1151 | -2.9095 | 0.9982 |
| SE1076 | SERP0966 | 2.330294 | 508.057  | 211.943 | 508.730  | 211.270 | 508.393  | 211.607 | 8    | 15   | 0.0157 | 0.0709 | 0.0159 | 0.0745 | 0.2134 | 0.1759 | -2.9160 | 0.9982 |
| SE0862 | SERP0752 | 2.330294 | 563.587  | 225.413 | 563.736  | 225.264 | 564.750  | 224.250 | 8    | 15   | 0.0142 | 0.0666 | 0.0143 | 0.0697 | 0.2052 | 0.1702 | -2.9203 | 0.9983 |
| SE0622 | SERP0516 | 2.330294 | 692.894  | 276.106 | 693.417  | 275.583 | 693.155  | 275.845 | 15   | 20   | 0.0216 | 0.0725 | 0.0220 | 0.0763 | 0.2883 | 0.2238 | -2.9289 | 0.9983 |
| SE0358 | SERP0235 | 2.330294 | 537.438  | 209.562 | 537.588  | 209.412 | 537.513  | 209.487 | 2    | 12   | 0.0037 | 0.0573 | 0.0037 | 0.0596 | 0.0621 | 0.0585 | -2.9454 | 0.9984 |
| SE0696 | SERP0587 | 2.330294 | 578.678  | 228.322 | 578.378  | 228.622 | 579.616  | 227.384 | 0    | 9    | 0.0000 | 0.0394 | 0.0000 | 0.0405 | 0.0000 | 0.0000 | -2.9779 | 0.9985 |
| SE0716 | SERP0605 | 2.330294 | 849.868  | 341.132 | 849.868  | 341.132 | 850.956  | 340.044 | 0    | 9    | 0.0000 | 0.0264 | 0.0000 | 0.0269 | 0.0000 | 0.0000 | -2.9889 | 0.9986 |
| SE0206 | SERP2371 | 2.330294 | 659.309  | 273.691 | 659.009  | 273.991 | 660.247  | 272.753 | 1    | 10   | 0.0015 | 0.0365 | 0.0015 | 0.0374 | 0.0401 | 0.0386 | -2.9931 | 0.9986 |
| SE1077 | SERP0967 | 2.330294 | 510.854  | 209.146 | 510.854  | 209.146 | 511.942  | 208.058 | 2    | 11   | 0.0039 | 0.0526 | 0.0039 | 0.0545 | 0.0716 | 0.0668 | -3.0057 | 0.9987 |
| SE1866 | SERP1874 | 2.330294 | 436.979  | 175.021 | 436.679  | 175.321 | 436.829  | 175.171 | 2    | 11   | 0.0046 | 0.0628 | 0.0046 | 0.0656 | 0.0701 | 0.0655 | -3.0117 | 0.9987 |
| SE0385 | SERP0268 | 2.330294 | 522.438  | 203.562 | 523.216  | 202.784 | 523.915  | 202.085 | 1    | 10   | 0.0019 | 0.0492 | 0.0019 | 0.0509 | 0.0373 | 0.0360 | -3.0225 | 0.9987 |
| SE0360 | SERP0237 | 2.330294 | 598.774  | 238.226 | 598.824  | 238.176 | 599.887  | 237.113 | 3    | 12   | 0.0050 | 0.0504 | 0.0050 | 0.0521 | 0.0960 | 0.0876 | -3.0246 | 0.9988 |
| SE0318 | SERP0195 | 2.330294 | 756.693  | 317.307 | 756.693  | 317.307 | 757.781  | 316.219 | 2    | 11   | 0.0026 | 0.0347 | 0.0026 | 0.0355 | 0.0732 | 0.0682 | -3.0274 | 0.9988 |
| SE0196 | SERP2380 | 2.330294 | 960.859  | 413.141 | 961.409  | 412.591 | 962.222  | 411.778 | 5    | 14   | 0.0052 | 0.0339 | 0.0052 | 0.0347 | 0.1499 | 0.1303 | -3.0484 | 0.9988 |
| SE0843 | SERP0733 | 2.330294 | 569.582  | 231.418 | 570.055  | 230.945 | 570.907  | 230.093 | 3    | 12   | 0.0053 | 0.0519 | 0.0053 | 0.0538 | 0.0985 | 0.0897 | -3.0530 | 0.9989 |
| SE2231 | SERP2263 | 2.330294 | 1417.707 | 547.293 | 1418.857 | 546.143 | 1419.371 | 545.629 | 3    | 12   | 0.0021 | 0.0219 | 0.0021 | 0.0223 | 0.0942 | 0.0861 | -3.0560 | 0.9989 |
| SE0325 | SERP0202 | 2.330294 | 477.807  | 182.193 | 477.381  | 182.619 | 478.683  | 181.317 | 3    | 12   | 0.0063 | 0.0658 | 0.0063 | 0.0689 | 0.0914 | 0.0838 | -3.0656 | 0.9989 |

|        |          |          |          |         |          |         |          |         |    |    |        |        |        |        |        |        |         |        |
|--------|----------|----------|----------|---------|----------|---------|----------|---------|----|----|--------|--------|--------|--------|--------|--------|---------|--------|
| SE0023 | SERP2529 | 2.330294 | 344.122  | 132.878 | 345.122  | 131.878 | 345.710  | 131.290 | 0  | 10 | 0.0000 | 0.0755 | 0.0000 | 0.0796 | 0.0000 | 0.0000 | -3.1094 | 0.9991 |
| SE0341 | SERP0216 | 2.330294 | 441.710  | 188.290 | 442.333  | 187.667 | 443.109  | 186.891 | 1  | 11 | 0.0023 | 0.0585 | 0.0023 | 0.0609 | 0.0378 | 0.0364 | -3.1103 | 0.9991 |
| SE0146 | SERP2421 | 2.330294 | 634.160  | 250.840 | 633.460  | 251.540 | 634.898  | 250.102 | 0  | 10 | 0.0000 | 0.0398 | 0.0000 | 0.0409 | 0.0000 | 0.0000 | -3.1221 | 0.9991 |
| SE0363 | SERP0240 | 2.330294 | 768.534  | 305.466 | 768.534  | 305.466 | 769.622  | 304.378 | 0  | 10 | 0.0000 | 0.0327 | 0.0000 | 0.0335 | 0.0000 | 0.0000 | -3.1308 | 0.9991 |
| SE1089 | SERP0976 | 2.330294 | 813.583  | 314.417 | 812.157  | 315.843 | 813.958  | 314.042 | 9  | 17 | 0.0111 | 0.0539 | 0.0112 | 0.0560 | 0.2000 | 0.1667 | -3.1356 | 0.9991 |
| SE0281 | SERP2297 | 2.330294 | 1480.609 | 583.391 | 1481.108 | 582.892 | 1481.947 | 582.053 | 15 | 21 | 0.0101 | 0.0360 | 0.0102 | 0.0369 | 0.2764 | 0.2166 | -3.1386 | 0.9992 |
| SE0389 | SERP0273 | 2.330294 | 554.665  | 219.335 | 554.842  | 219.158 | 555.842  | 218.158 | 2  | 12 | 0.0036 | 0.0547 | 0.0036 | 0.0568 | 0.0634 | 0.0596 | -3.1477 | 0.9992 |
| SE0329 | SERP0205 | 2.330294 | 628.061  | 247.939 | 627.362  | 248.638 | 628.800  | 247.200 | 6  | 15 | 0.0096 | 0.0604 | 0.0096 | 0.0630 | 0.1524 | 0.1322 | -3.1496 | 0.9992 |
| SE0135 | SERP2430 | 2.330294 | 913.195  | 373.805 | 914.195  | 372.805 | 914.783  | 372.217 | 2  | 12 | 0.0022 | 0.0321 | 0.0022 | 0.0329 | 0.0669 | 0.0627 | -3.1596 | 0.9992 |
| SE0356 | SERP0233 | 2.330294 | 318.872  | 131.128 | 319.296  | 130.704 | 320.173  | 129.827 | 1  | 11 | 0.0031 | 0.0840 | 0.0031 | 0.0891 | 0.0348 | 0.0336 | -3.1644 | 0.9992 |
| SE0830 | SERP0720 | 2.330294 | 527.082  | 210.918 | 525.859  | 212.141 | 526.470  | 211.530 | 7  | 16 | 0.0133 | 0.0756 | 0.0134 | 0.0797 | 0.1681 | 0.1439 | -3.1712 | 0.9992 |
| SE0165 | SERP2406 | 2.330294 | 537.244  | 215.756 | 534.170  | 218.830 | 536.795  | 216.205 | 11 | 19 | 0.0205 | 0.0874 | 0.0208 | 0.0930 | 0.2237 | 0.1828 | -3.1856 | 0.9993 |
| SE0833 | SERP0723 | 2.330294 | 658.599  | 265.401 | 661.098  | 262.902 | 659.848  | 264.152 | 8  | 17 | 0.0121 | 0.0644 | 0.0122 | 0.0673 | 0.1813 | 0.1535 | -3.1886 | 0.9993 |
| SE0214 | SERP2366 | 2.330294 | 1605.991 | 638.009 | 1605.991 | 638.009 | 1607.079 | 636.921 | 2  | 12 | 0.0012 | 0.0188 | 0.0012 | 0.0190 | 0.0632 | 0.0594 | -3.1939 | 0.9993 |
| SE1075 | SERP0965 | 2.330294 | 624.614  | 257.386 | 624.690  | 257.310 | 624.652  | 257.348 | 10 | 19 | 0.0160 | 0.0738 | 0.0162 | 0.0777 | 0.2085 | 0.1725 | -3.2460 | 0.9994 |
| SE0367 | SERP0244 | 2.330294 | 661.348  | 274.652 | 662.148  | 273.852 | 661.748  | 274.252 | 7  | 17 | 0.0106 | 0.0620 | 0.0107 | 0.0647 | 0.1654 | 0.1419 | -3.2624 | 0.9994 |
| SE0995 | SERP0883 | 2.330294 | 730.375  | 292.625 | 730.924  | 292.076 | 731.738  | 291.262 | 0  | 11 | 0.0000 | 0.0376 | 0.0000 | 0.0386 | 0.0000 | 0.0000 | -3.2712 | 0.9995 |
| SE0351 | SERP0228 | 2.330294 | 463.003  | 184.997 | 462.153  | 185.847 | 463.666  | 184.334 | 2  | 13 | 0.0043 | 0.0701 | 0.0043 | 0.0736 | 0.0584 | 0.0552 | -3.3109 | 0.9995 |
| SE0381 | SERP0263 | 2.330294 | 456.179  | 176.821 | 455.879  | 177.121 | 457.117  | 175.883 | 4  | 15 | 0.0088 | 0.0848 | 0.0088 | 0.0899 | 0.0979 | 0.0892 | -3.3238 | 0.9996 |
| SE1734 | SERP1743 | 2.330294 | 850.049  | 337.951 | 849.500  | 338.500 | 850.863  | 337.137 | 2  | 13 | 0.0024 | 0.0384 | 0.0024 | 0.0395 | 0.0608 | 0.0573 | -3.3332 | 0.9996 |
| SE0384 | SERP0267 | 2.330294 | 665.790  | 276.210 | 664.214  | 277.786 | 666.090  | 275.910 | 8  | 18 | 0.0120 | 0.0650 | 0.0121 | 0.0680 | 0.1779 | 0.1511 | -3.3351 | 0.9996 |
| SE1092 | SERP0979 | 2.330294 | 563.691  | 225.309 | 563.541  | 225.459 | 564.704  | 224.296 | 4  | 15 | 0.0071 | 0.0666 | 0.0071 | 0.0697 | 0.1019 | 0.0924 | -3.3389 | 0.9996 |
| SE0860 | SERP0750 | 2.330294 | 996.418  | 395.582 | 996.418  | 395.582 | 997.506  | 394.494 | 3  | 14 | 0.0030 | 0.0354 | 0.0030 | 0.0363 | 0.0826 | 0.0763 | -3.3480 | 0.9996 |
| SE0278 | SERP2299 | 2.330294 | 560.238  | 222.762 | 559.611  | 223.389 | 559.925  | 223.075 | 4  | 15 | 0.0071 | 0.0672 | 0.0072 | 0.0704 | 0.1023 | 0.0928 | -3.3533 | 0.9996 |
| SE0915 | SERP0806 | 2.330294 | 527.436  | 207.564 | 528.587  | 206.413 | 529.100  | 205.900 | 1  | 13 | 0.0019 | 0.0628 | 0.0019 | 0.0656 | 0.0290 | 0.0281 | -3.4070 | 0.9997 |
| SE0323 | SERP0200 | 2.330294 | 927.586  | 374.414 | 928.535  | 373.465 | 929.149  | 372.851 | 10 | 20 | 0.0108 | 0.0535 | 0.0109 | 0.0555 | 0.1964 | 0.1642 | -3.4429 | 0.9997 |
| SE0861 | SERP0751 | 2.330294 | 840.014  | 341.986 | 840.564  | 341.436 | 841.377  | 340.623 | 1  | 13 | 0.0012 | 0.0380 | 0.0012 | 0.0390 | 0.0308 | 0.0299 | -3.4471 | 0.9997 |
| SE0005 | SERP2548 | 2.330294 | 1898.033 | 780.967 | 1898.433 | 780.567 | 1899.321 | 779.679 | 1  | 13 | 0.0005 | 0.0167 | 0.0005 | 0.0168 | 0.0298 | 0.0289 | -3.4486 | 0.9997 |
| SE0627 | SERP0521 | 2.330294 | 891.652  | 344.348 | 892.253  | 343.747 | 891.953  | 344.047 | 6  | 17 | 0.0067 | 0.0494 | 0.0068 | 0.0511 | 0.1331 | 0.1174 | -3.4583 | 0.9997 |
| SE0388 | SERP0272 | 2.330294 | 514.932  | 202.068 | 514.133  | 202.867 | 514.533  | 202.467 | 2  | 14 | 0.0039 | 0.0691 | 0.0039 | 0.0725 | 0.0538 | 0.0510 | -3.4648 | 0.9997 |
| SE0320 | SERP0197 | 2.330294 | 732.225  | 296.775 | 732.150  | 296.850 | 733.276  | 295.724 | 3  | 15 | 0.0041 | 0.0505 | 0.0041 | 0.0523 | 0.0784 | 0.0727 | -3.4655 | 0.9997 |
| SE0359 | SERP0236 | 2.330294 | 693.222  | 293.778 | 692.922  | 294.078 | 694.161  | 292.839 | 2  | 14 | 0.0029 | 0.0476 | 0.0029 | 0.0492 | 0.0589 | 0.0557 | -3.4680 | 0.9997 |
| SE1067 | SERP0957 | 2.330294 | 623.116  | 249.884 | 623.417  | 249.583 | 624.355  | 248.645 | 3  | 15 | 0.0048 | 0.0601 | 0.0048 | 0.0626 | 0.0767 | 0.0712 | -3.4741 | 0.9997 |
| SE0338 | SERP0213 | 2.330294 | 475.601  | 187.399 | 475.702  | 187.298 | 475.652  | 187.348 | 3  | 15 | 0.0063 | 0.0801 | 0.0063 | 0.0847 | 0.0744 | 0.0692 | -3.4860 | 0.9998 |
| SE0195 | SERP2381 | 2.330294 | 2157.034 | 857.966 | 2155.562 | 859.438 | 2157.386 | 857.614 | 2  | 14 | 0.0009 | 0.0163 | 0.0009 | 0.0165 | 0.0545 | 0.0517 | -3.5014 | 0.9998 |
| SE1008 | SERP0896 | 2.330294 | 980.872  | 393.128 | 981.395  | 392.605 | 982.221  | 391.779 | 4  | 16 | 0.0041 | 0.0407 | 0.0041 | 0.0419 | 0.0979 | 0.0891 | -3.5042 | 0.9998 |
| SE0625 | SERP0519 | 2.330294 | 871.176  | 340.824 | 872.176  | 339.824 | 872.764  | 339.236 | 3  | 15 | 0.0034 | 0.0441 | 0.0034 | 0.0454 | 0.0749 | 0.0697 | -3.5093 | 0.9998 |
| SE2188 | SERP2199 | 2.330294 | 803.191  | 303.809 | 803.191  | 303.809 | 804.279  | 302.721 | 3  | 15 | 0.0037 | 0.0494 | 0.0037 | 0.0511 | 0.0724 | 0.0675 | -3.5161 | 0.9998 |
| SE0891 | SERP0782 | 2.330294 | 662.662  | 267.338 | 662.911  | 267.089 | 662.787  | 267.213 | 6  | 18 | 0.0091 | 0.0674 | 0.0091 | 0.0706 | 0.1289 | 0.1142 | -3.5267 | 0.9998 |

|        |          |          |          |         |          |         |          |         |      |      |        |        |        |        |        |        |         |        |
|--------|----------|----------|----------|---------|----------|---------|----------|---------|------|------|--------|--------|--------|--------|--------|--------|---------|--------|
| SE0697 | SERP0588 | 2.330294 | 600.271  | 251.729 | 600.371  | 251.629 | 601.409  | 250.591 | 11   | 22   | 0.0183 | 0.0874 | 0.0186 | 0.0929 | 0.2002 | 0.1668 | -3.5490 | 0.9998 |
| SE0639 | SERP0531 | 2.330294 | 828.477  | 323.523 | 827.576  | 324.424 | 828.026  | 323.974 | 6    | 18   | 0.0072 | 0.0556 | 0.0073 | 0.0577 | 0.1265 | 0.1123 | -3.5688 | 0.9998 |
| SE0621 | SERP0515 | 2.330294 | 551.706  | 225.294 | 552.006  | 224.994 | 552.944  | 224.056 | 3    | 16   | 0.0054 | 0.0711 | 0.0055 | 0.0747 | 0.0736 | 0.0686 | -3.5946 | 0.9998 |
| SE1070 | SERP0960 | 2.330294 | 701.926  | 273.074 | 702.227  | 272.773 | 703.165  | 271.835 | 2    | 15   | 0.0028 | 0.0550 | 0.0029 | 0.0571 | 0.0508 | 0.0483 | -3.6053 | 0.9998 |
| SE0191 | SERP2384 | 2.330294 | 783.648  | 320.352 | 784.646  | 319.354 | 784.147  | 319.853 | 12.5 | 23.5 | 0.0159 | 0.0735 | 0.0161 | 0.0773 | 0.2083 | 0.1724 | -3.6489 | 0.9999 |
| SE0371 | SERP0253 | 2.330294 | 851.534  | 333.466 | 851.510  | 333.490 | 852.610  | 332.390 | 12   | 23   | 0.0141 | 0.0690 | 0.0142 | 0.0724 | 0.1961 | 0.1640 | -3.6520 | 0.9999 |
| SE2161 | SERP2172 | 2.330294 | 1135.632 | 457.368 | 1135.632 | 457.368 | 1135.632 | 457.368 | 6    | 19   | 0.0053 | 0.0415 | 0.0053 | 0.0427 | 0.1241 | 0.1104 | -3.6628 | 0.9999 |
| SE1066 | SERP0956 | 2.330294 | 461.550  | 183.450 | 461.850  | 183.150 | 462.788  | 182.212 | 1    | 15   | 0.0022 | 0.0818 | 0.0022 | 0.0867 | 0.0254 | 0.0247 | -3.6730 | 0.9999 |
| SE0897 | SERP0788 | 2.330294 | 457.911  | 184.089 | 457.034  | 184.966 | 458.561  | 183.439 | 2    | 16   | 0.0044 | 0.0867 | 0.0044 | 0.0921 | 0.0478 | 0.0456 | -3.6999 | 0.9999 |
| SE0021 | SERP2531 | 2.330294 | 568.066  | 220.934 | 566.366  | 222.634 | 567.216  | 221.784 | 3    | 17   | 0.0053 | 0.0767 | 0.0053 | 0.0809 | 0.0655 | 0.0615 | -3.7172 | 0.9999 |
| SE0163 | SERP2408 | 2.330294 | 343.701  | 148.299 | 343.053  | 148.947 | 343.377  | 148.623 | 13   | 25   | 0.0379 | 0.1682 | 0.0388 | 0.1905 | 0.2037 | 0.1692 | -3.7185 | 0.9999 |
| SE0542 | SERP0427 | 2.330294 | 1995.186 | 836.814 | 1995.235 | 836.765 | 1996.299 | 835.701 | 1    | 15   | 0.0005 | 0.0179 | 0.0005 | 0.0181 | 0.0276 | 0.0269 | -3.7237 | 0.9999 |
| SE0877 | SERP0767 | 2.330294 | 901.631  | 373.369 | 901.782  | 373.218 | 902.795  | 372.205 | 2    | 16   | 0.0022 | 0.0429 | 0.0022 | 0.0441 | 0.0499 | 0.0475 | -3.7362 | 0.9999 |
| SE0887 | SERP0778 | 2.330294 | 851.252  | 345.748 | 850.952  | 346.048 | 852.190  | 344.810 | 3    | 17   | 0.0035 | 0.0491 | 0.0035 | 0.0508 | 0.0689 | 0.0645 | -3.7365 | 0.9999 |
| SE0375 | SERP0257 | 2.330294 | 720.321  | 299.679 | 720.745  | 299.255 | 721.621  | 298.379 | 5    | 19   | 0.0069 | 0.0634 | 0.0070 | 0.0663 | 0.1056 | 0.0955 | -3.7515 | 0.9999 |
| SE0332 | SERP0208 | 2.330294 | 1075.096 | 424.904 | 1073.622 | 426.378 | 1074.359 | 425.641 | 18   | 28   | 0.0168 | 0.0658 | 0.0169 | 0.0688 | 0.2456 | 0.1972 | -3.7628 | 0.9999 |
| SE2042 | SERP2055 | 2.330294 | 1162.974 | 475.026 | 1161.324 | 476.676 | 1163.237 | 474.763 | 5    | 19   | 0.0043 | 0.0399 | 0.0043 | 0.0410 | 0.1049 | 0.0949 | -3.7881 | 0.9999 |
| SE2041 | SERP2054 | 2.330294 | 1074.693 | 413.307 | 1074.644 | 413.356 | 1075.757 | 412.243 | 4    | 18   | 0.0037 | 0.0435 | 0.0037 | 0.0449 | 0.0824 | 0.0761 | -3.7912 | 0.9999 |
| SE0787 | SERP0676 | 2.330294 | 1190.552 | 489.448 | 1189.852 | 490.148 | 1191.290 | 488.710 | 0    | 15   | 0.0000 | 0.0306 | 0.0000 | 0.0313 | 0.0000 | 0.0000 | -3.8171 | 0.9999 |
| SE0637 | SERP0529 | 2.330294 | 930.625  | 383.375 | 929.126  | 384.874 | 929.875  | 384.125 | 7    | 21   | 0.0075 | 0.0547 | 0.0076 | 0.0568 | 0.1338 | 0.1180 | -3.8342 | 0.9999 |
| SE0245 | SERP2336 | 2.330294 | 1575.543 | 608.457 | 1575.693 | 608.307 | 1575.618 | 608.382 | 6    | 20   | 0.0038 | 0.0329 | 0.0038 | 0.0336 | 0.1131 | 0.1016 | -3.8369 | 0.9999 |
| SE2147 | SERP2158 | 2.330294 | 1011.527 | 437.473 | 1012.076 | 436.924 | 1012.890 | 436.110 | 3    | 18   | 0.0030 | 0.0412 | 0.0030 | 0.0423 | 0.0709 | 0.0662 | -3.8371 | 0.9999 |
| SE0337 | SERP0212 | 2.330294 | 622.401  | 253.599 | 622.401  | 253.599 | 623.489  | 252.511 | 2    | 17   | 0.0032 | 0.0670 | 0.0032 | 0.0702 | 0.0456 | 0.0436 | -3.8391 | 0.9999 |
| SE0016 | SERP2536 | 2.330294 | 898.488  | 382.512 | 899.465  | 381.535 | 900.065  | 380.935 | 1    | 16   | 0.0011 | 0.0419 | 0.0011 | 0.0431 | 0.0255 | 0.0249 | -3.8689 | 0.9999 |
| SE0350 | SERP0227 | 2.330294 | 696.047  | 281.953 | 697.498  | 280.502 | 696.772  | 281.228 | 5    | 20   | 0.0072 | 0.0711 | 0.0072 | 0.0747 | 0.0964 | 0.0879 | -3.8750 | 0.9999 |
| SE0831 | SERP0721 | 2.330294 | 753.663  | 302.337 | 753.663  | 302.337 | 754.751  | 301.249 | 4    | 19   | 0.0053 | 0.0628 | 0.0053 | 0.0656 | 0.0808 | 0.0748 | -3.8812 | 0.9999 |
| SE2220 | SERP2253 | 2.330294 | 889.256  | 352.744 | 889.355  | 352.645 | 890.394  | 351.606 | 3    | 18   | 0.0034 | 0.0510 | 0.0034 | 0.0529 | 0.0643 | 0.0604 | -3.8847 | 0.9999 |
| SE0695 | SERP0586 | 2.330294 | 459.126  | 173.874 | 457.577  | 175.423 | 459.440  | 173.560 | 1    | 17   | 0.0022 | 0.0973 | 0.0022 | 0.1043 | 0.0211 | 0.0207 | -3.8981 | 1.0000 |
| SE0037 | SERP2498 | 2.330294 | 965.603  | 381.397 | 968.051  | 378.949 | 966.827  | 380.173 | 24   | 33   | 0.0248 | 0.0868 | 0.0252 | 0.0923 | 0.2730 | 0.2145 | -3.8996 | 1.0000 |
| SE0022 | SERP2530 | 2.330294 | 583.314  | 214.686 | 582.765  | 215.235 | 584.128  | 213.872 | 0    | 16   | 0.0000 | 0.0744 | 0.0000 | 0.0784 | 0.0000 | 0.0000 | -3.9005 | 1.0000 |
| SE2192 | SERP2203 | 2.330294 | 1446.970 | 563.030 | 1447.420 | 562.580 | 1448.283 | 561.717 | 3    | 18   | 0.0021 | 0.0320 | 0.0021 | 0.0327 | 0.0642 | 0.0603 | -3.9266 | 1.0000 |
| SE0698 | SERP0589 | 2.330294 | 985.969  | 397.031 | 986.518  | 396.482 | 987.332  | 395.668 | 2    | 18   | 0.0020 | 0.0454 | 0.0020 | 0.0468 | 0.0427 | 0.0410 | -3.9691 | 1.0000 |
| SE2160 | SERP2170 | 2.330294 | 1869.951 | 755.049 | 1871.076 | 753.924 | 1871.602 | 753.398 | 6    | 21   | 0.0032 | 0.0278 | 0.0032 | 0.0284 | 0.1127 | 0.1013 | -3.9780 | 1.0000 |
| SE0852 | SERP0742 | 2.330294 | 1161.045 | 449.955 | 1163.347 | 447.653 | 1162.196 | 448.804 | 20   | 31   | 0.0172 | 0.0691 | 0.0174 | 0.0725 | 0.2400 | 0.1935 | -4.0032 | 1.0000 |
| SE0910 | SERP0801 | 2.330294 | 876.786  | 347.214 | 876.437  | 347.563 | 877.700  | 346.300 | 5    | 21   | 0.0057 | 0.0605 | 0.0057 | 0.0630 | 0.0905 | 0.0830 | -4.0241 | 1.0000 |
| SE1074 | SERP0964 | 2.330294 | 697.521  | 289.479 | 696.572  | 290.428 | 698.135  | 288.865 | 7    | 23   | 0.0100 | 0.0793 | 0.0101 | 0.0838 | 0.1205 | 0.1076 | -4.0492 | 1.0000 |
| SE0858 | SERP0748 | 2.330294 | 949.641  | 397.359 | 948.717  | 398.283 | 950.267  | 396.733 | 6    | 22   | 0.0063 | 0.0553 | 0.0063 | 0.0574 | 0.1098 | 0.0989 | -4.0647 | 1.0000 |
| SE0632 | SERP0524 | 2.330294 | 747.623  | 314.377 | 747.747  | 314.253 | 747.685  | 314.315 | 5    | 23   | 0.0067 | 0.0732 | 0.0067 | 0.0770 | 0.0870 | 0.0800 | -4.0724 | 1.0000 |
| SE1078 | SERP0968 | 2.330294 | 819.413  | 329.587 | 818.513  | 330.487 | 818.963  | 330.037 | 5    | 22   | 0.0061 | 0.0667 | 0.0061 | 0.0698 | 0.0874 | 0.0804 | -4.1527 | 1.0000 |

|        |          |          |          |          |          |          |          |          |      |      |        |        |        |        |        |        |         |        |
|--------|----------|----------|----------|----------|----------|----------|----------|----------|------|------|--------|--------|--------|--------|--------|--------|---------|--------|
| SE0857 | SERP0747 | 2.330294 | 687.671  | 275.329  | 687.371  | 275.629  | 688.609  | 274.391  | 1    | 19   | 0.0015 | 0.0690 | 0.0015 | 0.0724 | 0.0207 | 0.0203 | -4.1788 | 1.0000 |
| SE1068 | SERP0958 | 2.330294 | 626.184  | 276.816  | 625.184  | 277.816  | 626.772  | 276.228  | 4    | 22   | 0.0064 | 0.0793 | 0.0064 | 0.0838 | 0.0764 | 0.0710 | -4.1885 | 1.0000 |
| SE0854 | SERP0744 | 2.330294 | 658.120  | 274.880  | 657.220  | 275.780  | 658.758  | 274.242  | 3    | 21   | 0.0046 | 0.0763 | 0.0046 | 0.0804 | 0.0572 | 0.0541 | -4.2137 | 1.0000 |
| SE0901 | SERP0792 | 2.330294 | 1193.463 | 462.537  | 1191.463 | 464.537  | 1192.963 | 463.037  | 15   | 30   | 0.0126 | 0.0647 | 0.0127 | 0.0677 | 0.1876 | 0.1580 | -4.2227 | 1.0000 |
| SE1130 | SERP1012 | 2.330294 | 628.415  | 247.585  | 628.265  | 247.735  | 629.428  | 246.572  | 0    | 19   | 0.0000 | 0.0767 | 0.0000 | 0.0809 | 0.0000 | 0.0000 | -4.2579 | 1.0000 |
| SE0906 | SERP0797 | 2.330294 | 523.033  | 208.967  | 522.183  | 209.817  | 523.696  | 208.304  | 0    | 19   | 0.0000 | 0.0907 | 0.0000 | 0.0967 | 0.0000 | 0.0000 | -4.2788 | 1.0000 |
| SE0842 | SERP0732 | 2.330294 | 603.529  | 236.471  | 604.153  | 235.847  | 604.929  | 235.071  | 1    | 20   | 0.0017 | 0.0847 | 0.0017 | 0.0899 | 0.0189 | 0.0186 | -4.2877 | 1.0000 |
| SE0362 | SERP0239 | 2.330294 | 697.024  | 283.976  | 696.874  | 284.126  | 698.037  | 282.963  | 3    | 22   | 0.0043 | 0.0775 | 0.0043 | 0.0817 | 0.0526 | 0.0500 | -4.3299 | 1.0000 |
| SE1080 | SERP0970 | 2.330294 | 897.206  | 365.794  | 897.529  | 365.471  | 898.455  | 364.545  | 4    | 23   | 0.0045 | 0.0629 | 0.0045 | 0.0657 | 0.0685 | 0.0641 | -4.3487 | 1.0000 |
| SE1071 | SERP0961 | 2.330294 | 641.690  | 252.310  | 639.889  | 254.111  | 640.790  | 253.210  | 6    | 26   | 0.0094 | 0.1027 | 0.0094 | 0.1104 | 0.0851 | 0.0785 | -4.5040 | 1.0000 |
| SE0893 | SERP0784 | 2.330294 | 783.725  | 308.275  | 783.495  | 308.505  | 784.698  | 307.302  | 2    | 23   | 0.0026 | 0.0746 | 0.0026 | 0.0786 | 0.0331 | 0.0320 | -4.5247 | 1.0000 |
| SE1065 | SERP0955 | 2.330294 | 1288.831 | 520.169  | 1288.159 | 520.841  | 1288.495 | 520.505  | 15   | 33   | 0.0116 | 0.0634 | 0.0117 | 0.0662 | 0.1767 | 0.1502 | -4.5291 | 1.0000 |
| SE0624 | SERP0518 | 2.330294 | 1037.945 | 417.055  | 1040.871 | 414.129  | 1039.408 | 415.592  | 10   | 30   | 0.0096 | 0.0722 | 0.0097 | 0.0759 | 0.1278 | 0.1133 | -4.5855 | 1.0000 |
| SE0836 | SERP0726 | 2.330294 | 1222.830 | 484.170  | 1223.257 | 483.743  | 1224.132 | 482.868  | 12   | 32   | 0.0098 | 0.0661 | 0.0099 | 0.0692 | 0.1431 | 0.1252 | -4.6648 | 1.0000 |
| SE0892 | SERP0783 | 2.330294 | 937.316  | 367.684  | 939.115  | 365.885  | 938.216  | 366.784  | 9    | 30   | 0.0096 | 0.0818 | 0.0097 | 0.0866 | 0.1120 | 0.1007 | -4.7129 | 1.0000 |
| SE0369 | SERP0251 | 2.330294 | 925.015  | 370.985  | 924.391  | 371.609  | 924.703  | 371.297  | 2    | 25   | 0.0022 | 0.0673 | 0.0022 | 0.0705 | 0.0312 | 0.0303 | -4.7502 | 1.0000 |
| SE1090 | SERP0977 | 2.330294 | 952.203  | 388.797  | 949.904  | 391.096  | 951.053  | 389.947  | 8.5  | 31.5 | 0.0089 | 0.0808 | 0.0090 | 0.0855 | 0.1053 | 0.0952 | -4.8440 | 1.0000 |
| SE1072 | SERP0962 | 2.330294 | 1145.346 | 459.654  | 1145.097 | 459.903  | 1146.309 | 458.691  | 2    | 26   | 0.0017 | 0.0565 | 0.0017 | 0.0588 | 0.0289 | 0.0281 | -4.8549 | 1.0000 |
| SE0912 | SERP0803 | 2.330294 | 981.845  | 383.155  | 982.020  | 382.980  | 983.020  | 381.980  | 1    | 26   | 0.0010 | 0.0679 | 0.0010 | 0.0711 | 0.0141 | 0.0139 | -4.9244 | 1.0000 |
| SE1099 | SERP0988 | 2.330294 | 982.113  | 385.887  | 980.740  | 387.260  | 982.515  | 385.485  | 4    | 29   | 0.0041 | 0.0750 | 0.0041 | 0.0790 | 0.0519 | 0.0493 | -4.9495 | 1.0000 |
| SE0321 | SERP0198 | 2.330294 | 1215.702 | 476.298  | 1215.075 | 476.925  | 1216.477 | 475.523  | 14   | 37   | 0.0115 | 0.0776 | 0.0116 | 0.0819 | 0.1416 | 0.1241 | -4.9703 | 1.0000 |
| SE1069 | SERP0959 | 2.330294 | 648.728  | 275.272  | 648.702  | 275.298  | 649.803  | 274.197  | 0    | 26   | 0.0000 | 0.0944 | 0.0000 | 0.1009 | 0.0000 | 0.0000 | -5.0199 | 1.0000 |
| SE0346 | SERP0220 | 2.330294 | 815.849  | 330.151  | 815.246  | 330.754  | 815.548  | 330.452  | 6    | 32   | 0.0074 | 0.0968 | 0.0074 | 0.1037 | 0.0714 | 0.0666 | -5.0583 | 1.0000 |
| SE0888 | SERP0779 | 2.330294 | 1714.963 | 691.037  | 1715.790 | 690.210  | 1716.465 | 689.535  | 12   | 37   | 0.0070 | 0.0536 | 0.0070 | 0.0556 | 0.1259 | 0.1118 | -5.1090 | 1.0000 |
| SE0380 | SERP0262 | 2.330294 | 1185.003 | 473.997  | 1185.329 | 473.671  | 1186.254 | 472.746  | 8    | 34   | 0.0068 | 0.0718 | 0.0068 | 0.0754 | 0.0902 | 0.0827 | -5.1131 | 1.0000 |
| SE0904 | SERP0795 | 2.330294 | 695.796  | 279.204  | 696.096  | 278.904  | 697.034  | 277.966  | 2    | 29   | 0.0029 | 0.1039 | 0.0029 | 0.1119 | 0.0259 | 0.0253 | -5.1188 | 1.0000 |
| SE0856 | SERP0746 | 2.330294 | 1685.205 | 639.795  | 1684.304 | 640.696  | 1684.754 | 640.246  | 12   | 37   | 0.0071 | 0.0578 | 0.0072 | 0.0601 | 0.1198 | 0.1070 | -5.1664 | 1.0000 |
| SE0832 | SERP0722 | 2.330294 | 1694.652 | 705.348  | 1694.776 | 705.224  | 1694.714 | 705.286  | 19.5 | 44.5 | 0.0115 | 0.0631 | 0.0116 | 0.0659 | 0.1760 | 0.1497 | -5.2289 | 1.0000 |
| SE0884 | SERP0775 | 2.330294 | 1220.748 | 474.252  | 1222.597 | 472.403  | 1222.761 | 472.239  | 4    | 32   | 0.0033 | 0.0676 | 0.0033 | 0.0709 | 0.0465 | 0.0445 | -5.2405 | 1.0000 |
| SE1091 | SERP0978 | 2.330294 | 1361.776 | 525.224  | 1361.377 | 525.623  | 1362.665 | 524.335  | 9    | 37   | 0.0066 | 0.0704 | 0.0066 | 0.0739 | 0.0893 | 0.0820 | -5.3440 | 1.0000 |
| SE0841 | SERP0731 | 2.330294 | 1258.950 | 505.050  | 1258.473 | 505.527  | 1259.800 | 504.200  | 1    | 33   | 0.0008 | 0.0653 | 0.0008 | 0.0683 | 0.0117 | 0.0116 | -5.6125 | 1.0000 |
| SE0909 | SERP0800 | 2.330294 | 2539.242 | 1027.758 | 2540.492 | 1026.508 | 2539.867 | 1027.133 | 19.5 | 54.5 | 0.0077 | 0.0531 | 0.0077 | 0.0550 | 0.1400 | 0.1228 | -6.1135 | 1.0000 |
| SE0902 | SERP0793 | 2.330294 | 1457.848 | 588.152  | 1459.147 | 586.853  | 1458.497 | 587.503  | 10.5 | 49.5 | 0.0072 | 0.0843 | 0.0072 | 0.0894 | 0.0805 | 0.0745 | -6.1348 | 1.0000 |
| SE0699 | SERP0590 | 2.330294 | 1303.657 | 538.343  | 1304.407 | 537.593  | 1305.120 | 536.880  | 4    | 43   | 0.0031 | 0.0799 | 0.0031 | 0.0845 | 0.0367 | 0.0354 | -6.1734 | 1.0000 |
| SE1097 | SERP0986 | 2.330294 | 2003.770 | 798.230  | 2003.520 | 798.480  | 2004.733 | 797.267  | 4    | 43   | 0.0020 | 0.0539 | 0.0020 | 0.0559 | 0.0358 | 0.0345 | -6.2255 | 1.0000 |
| SE0837 | SERP0727 | 2.330294 | 1672.805 | 673.195  | 1671.554 | 674.446  | 1673.267 | 672.733  | 15   | 58   | 0.0090 | 0.0861 | 0.0090 | 0.0914 | 0.0985 | 0.0896 | -6.5850 | 1.0000 |
| SE0036 | SERP2499 | 2.330294 | 1173.611 | 452.389  | 1177.382 | 448.618  | 1175.496 | 450.504  | 50   | 81   | 0.0425 | 0.1798 | 0.0438 | 0.2056 | 0.2130 | 0.1756 | -6.6026 | 1.0000 |
| SE0690 | SERP0580 | 2.330294 | 1284.015 | 521.985  | 1281.967 | 524.033  | 1282.991 | 523.009  | 4    | 53   | 0.0031 | 0.1013 | 0.0031 | 0.1089 | 0.0285 | 0.0277 | -6.7467 | 1.0000 |
| SE0868 | SERP0758 | 2.330294 | 1971.136 | 776.864  | 1970.486 | 777.514  | 1971.899 | 776.101  | 8    | 54   | 0.0041 | 0.0695 | 0.0041 | 0.0729 | 0.0562 | 0.0532 | -6.7474 | 1.0000 |



|        |          |          |          |         |          |         |          |         |    |    |        |        |        |        |        |        |         |        |
|--------|----------|----------|----------|---------|----------|---------|----------|---------|----|----|--------|--------|--------|--------|--------|--------|---------|--------|
| SE1131 | SERP1013 | 2.330294 | 2462.809 | 972.191 | 2468.585 | 966.415 | 2465.697 | 969.303 | 34 | 75 | 0.0138 | 0.0774 | 0.0139 | 0.0817 | 0.1701 | 0.1454 | -6.8346 | 1.0000 |
| SE0879 | SERP0769 | 2.330294 | 2248.866 | 922.134 | 2247.067 | 923.933 | 2247.966 | 923.034 | 9  | 74 | 0.0040 | 0.0802 | 0.0040 | 0.0848 | 0.0472 | 0.0450 | -7.9345 | 1.0000 |

---
