# Supplementary material for: Conserved genes in a path from commensalism to pathogenicity: comparative phylogenetic profiles of Staphylococcus epidermidis RP62A and ATCC12228
Source: PubMed Central journal article supplement (PMC1482698; doi:10.1186/1471-2164-7-112), 2006-05-10

Additional file 7 – Comparison the sensitivity to H<sub>2</sub>O<sub>2</sub> (5%) of both *Staphylococcus epidermidis* strains.

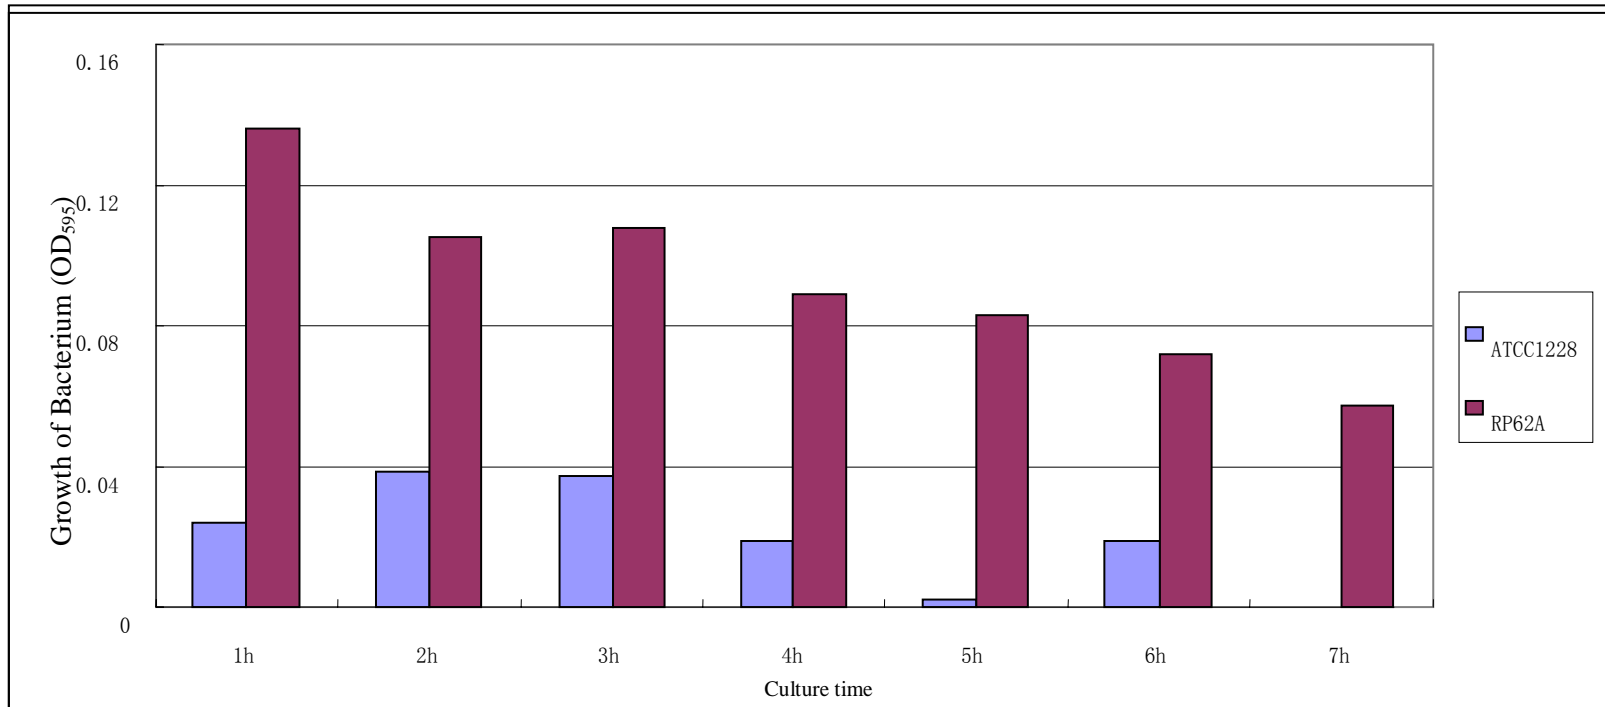

Supplement: 1471-2164-7-112-S7.pdf [file 1471-2164-7-112-S7.pdf]
