# Supplementary material for: Conserved genes in a path from commensalism to pathogenicity: comparative phylogenetic profiles of Staphylococcus epidermidis RP62A and ATCC12228
Source: PubMed Central journal article supplement (PMC1482698; doi:10.1186/1471-2164-7-112), 2006-05-10
Supplement: 1471-2164-7-112-S8.pdf [file 1471-2164-7-112-S8.pdf]

### Additional file 8 –Primers used in the PCR experiments.

| Number          |          | Primer |                              | Products |
|-----------------|----------|--------|------------------------------|----------|
| ATCC12228 RP62A |          |        |                              |          |
| SE1029          | SERP0918 | Sense  | 5'-GGCGTTAATGCTGAACAATTT-3'  | 2192     |
|                 |          | Anti   | 5'-TCGTTGATTTCGCTTGAAAAA-3'  |          |
| SE0231          | SERP2349 | Sense  | 5'-TCCTGTGATCATTTCGTTTGG-3'  | 760      |
|                 |          | Anti   | 5'-AGGTTGGGGTCATTTTGATG-3'   |          |
| SE0800          | SERP0689 | Sense  | 5'-ACCCACTCAAATGAGAAGTTA-3'  | 981      |
|                 |          | Anti   | 5'-ACCATTTGCTATTTTAAAGAC-3'  |          |
| SE1546          | SERP1399 | Sense  | 5'-TGAGCACTTCCTCATCAACAA-3'  | 846      |
|                 |          | Anti   | 5'-TTTGGCAAGGAGAATATGGG-3'   |          |
| SE2085          | SERP2099 | Sense  | 5'-CTACTCTTAGCACCACCACCG-3'  | 1224     |
|                 |          | Anti   | 5'-AGGGTGAACGATGGTGAAAG-3'   |          |
| SE1042          | SERP0931 | Sense  | 5'-TCAATTGTTGTTCCAGGCAT-3'   | 424      |
|                 |          | Anti   | 5'-ATCGATCCTTTGGATGATGG-3'   |          |
| SE0977          | SERP0866 | Sense  | 5'-ACGTAGGGGTCTCCCTGTTT-3'   | 421      |
|                 |          | Anti   | 5'-TTTAATGGCTGGTGCTGTTG-3'   |          |
| SE1170          | SERP1049 | Sense  | 5'-CACTGCTTAATTGGGTCTACA-3'  | 1422     |
|                 |          | Anti   | 5'-GGAATGGTTTGGTTTGTGATGA-3' |          |
| SE0502          | SERP0385 | Sense  | 5'-CCCCAAATGAAAAAGTGGAA-3'   | 394      |
|                 |          | Anti   | 5'-AGTCACTTTTAGGTTCGCGTTC-3' |          |
| SE0546          | SERP0431 | Sense  | 5'-TAAACGAGCCAAACAAGGC-3'    | 1083     |
|                 |          | Anti   | 5'-GCCTCTTGGTAAGTGGTTGG-3'   |          |
| SE0265          |          | Sense  | 5'-TGTTGATTTGAGGTTGCTCAT-3'  | 422      |
|                 |          | Anti   | 5'-CGAACGGAACCTTGAACAAT-3'   |          |
|                 | SERP2313 | Sense  | 5'-CGAACGGAACCTTCAACAAT-3'   |          |
|                 |          | Anti   | 5'-TGTTGATTTGAGGTTGCTCAT-3'  |          |
| SE0378          |          | Sense  | 5'-TTTGAAGATGGGCATTTCCCT-3'  | 470      |
|                 |          | Anti   | 5'-GCATAAACTGCTATTGCTTG-3'   |          |
|                 | SERP0259 | Sense  | 5'-TGAAAAAGACAATGTTTCATCA-3' |          |
|                 |          | Anti   | 5'-CGAATTTCAAAAGGCGAGAG-3'   |          |
| SE0039          |          | Sense  | 5'-AGATGGCAGTTTTTGTGTCG-3'   | 392      |
|                 |          | Anti   | 5'-GGACGTTGGTTCGCATATTT-3'   |          |
|                 | SERP2495 | Sense  | 5'-GGACGTTGGTTCGCATATTT-3'   |          |
|                 |          | Anti   | 5'-AAGATGGCAGTTTTTGTGTTG-3'  |          |
