# Supplementary material for: Conserved genes in a path from commensalism to pathogenicity: comparative phylogenetic profiles of Staphylococcus epidermidis RP62A and ATCC12228
Source: PubMed Central journal article supplement (PMC1482698; doi:10.1186/1471-2164-7-112), 2006-05-10
Supplement: 1471-2164-7-112-S9.pdf [file 1471-2164-7-112-S9.pdf]

**Additional file 9 – Comparison of identical and non-identical distribution of different functional groups of orthologous genes**

| Groups <sup>a</sup> | No.CDS | Non-identical <sup>b</sup> | Identical <sup>b</sup> | Ratio <sup>b</sup> | $P_I$ <sup>c</sup> | $P_{II}$             | $P_{III}$            |
|---------------------|--------|----------------------------|------------------------|--------------------|--------------------|----------------------|----------------------|
| I                   | 28     | 15                         | 13                     | 1.461538           |                    |                      |                      |
| II                  | 12     | 12                         | 0                      | -                  | 0.004*             |                      |                      |
| III                 | 139    | 60                         | 79                     | 0.898734           | 0.313              | 0.000*               |                      |
| Total               | 2053   | 1194                       | 859                    | 1.816065           | 0.544 <sup>d</sup> | 0.003 <sup>d</sup> * | 0.000 <sup>d</sup> * |

<sup>a</sup> Groups defines as ( I ) orthologous genes whose products are virulence factors and genomic islands in two *S. epidermidis* genome; ( II ) orthologous genes whose products are surface proteins; ( III ) orthologous genes whose products belong to translation, ribosomal structure and biogenesis catalog according to COG.

<sup>b</sup> (Non-identical) number of non-identical orthologs; (Identical) number of identical orthologs; (Ratio) ratios of non-identical orthologs vs. identical orthologs.

<sup>c</sup>  $P$ -value from  $\chi^2$  test for the difference in ratios in all the pairwise comparisons among the three functional groups (\* indicates  $p < 0.05$ ).

<sup>d</sup>  $P$ -value from  $\chi^2$  test for the difference in ratios between the three functional groups and total without themselves (\* indicates  $p < 0.05$ ).
